# Supplementary material for: Stem cell topography splits growth and homeostatic functions in the fish gill
Source: eLife. 2019 May 16;8:e43747. doi: 10.7554/eLife.43747 (PMC6534379; doi:10.7554/eLife.43747)
Supplement: Figure 3—source data 1. [file elife-43747-fig3-data1.xlsx]

## Sheet: All Values
test_id	gene_id	gene	locus	sample_1	sample_2	status	value_1	value_2	v1+v2	log2(fold_change)	test_stat	p_value	q_value	significant
ENSORLG00000000002	ENSORLG00000000002	-	chr2:1626018-1641228	medial	apical	NOTEST	0	0		0	0	1	1	no
ENSORLG00000000003	ENSORLG00000000003	-	chr1:1081658-1083695	medial	apical	NOTEST	0	0		0	0	1	1	no
ENSORLG00000000005	ENSORLG00000000005	cyp20a1	chr2:1641329-1646350	medial	apical	NOTEST	0	0		0	0	1	1	no
ENSORLG00000000006	ENSORLG00000000006	-	chr3:1880382-1905200	medial	apical	NOTEST	1.99089	0.767747		-1.37471	0	1	1	no
ENSORLG00000000007	ENSORLG00000000007	si:ch211-113e8.3	chr1:1092087-1101211	medial	apical	NOTEST	0.053848	0.143769		1.41679	0	1	1	no
ENSORLG00000000008	ENSORLG00000000008	tmem237b	chr2:1646719-1664407	medial	apical	NOTEST	0	0		0	0	1	1	no
ENSORLG00000000009	ENSORLG00000000009	slc43a1b	chr1:1130193-1144185	medial	apical	NOTEST	0	0		0	0	1	1	no
ENSORLG00000000010	ENSORLG00000000010	slc22a18	chr3:1905470-1916741	medial	apical	NOTEST	0	0.110502		inf	0	1	1	no
ENSORLG00000000011	ENSORLG00000000011	NR2E3	chr3:1961331-1965158	medial	apical	NOTEST	0	0		0	0	1	1	no
ENSORLG00000000012	ENSORLG00000000012	si:ch211-222n4.6	chr2:1646719-1664407	medial	apical	NOTEST	0	0		0	0	1	1	no
ENSORLG00000000013	ENSORLG00000000013	si:dkey-28b4.8	chr1:1147824-1161563	medial	apical	NOTEST	0	0		0	0	1	1	no
ENSORLG00000000016	ENSORLG00000000016	-	chr1:1191751-1198900	medial	apical	OK	3.91053	1.89467		-1.04542	-1.67156	0.00535	0.0822803	no
ENSORLG00000000017	ENSORLG00000000017	-	chr3:744314-746507	medial	apical	NOTEST	0	0.138601		inf	0	1	1	no
ENSORLG00000000021	ENSORLG00000000021	Orla-DCA	chr3:2050930-2062150	medial	apical	NOTEST	0	0		0	0	1	1	no
ENSORLG00000000024	ENSORLG00000000024	als2b	chr2:1665929-1685769	medial	apical	NOTEST	0	0		0	0	1	1	no
ENSORLG00000000025	ENSORLG00000000025	-	chr3:2050930-2062150	medial	apical	NOTEST	0	0		0	0	1	1	no
ENSORLG00000000026	ENSORLG00000000026	zgc:113142	chr2:1689137-1691779	medial	apical	NOTEST	0	0		0	0	1	1	no
ENSORLG00000000027	ENSORLG00000000027	ENTPD7	chr1:1304571-1311041	medial	apical	NOTEST	0.320601	0.263751		-0.281602	0	1	1	no
ENSORLG00000000029	ENSORLG00000000029	PPFIA1	chr3:2090751-2154832	medial	apical	NOTEST	0.295722	0.42786		0.5329	0	1	1	no
ENSORLG00000000030	ENSORLG00000000030	inpp4ab	chr2:1694598-1727114	medial	apical	NOTEST	0	0		0	0	1	1	no
ENSORLG00000000031	ENSORLG00000000031	GOT1 (1 of many)	chr1:1367512-1373413	medial	apical	NOTEST	0.878502	1.04938		0.256422	0	1	1	no
ENSORLG00000000034	ENSORLG00000000034	cttn	chr3:2167730-2177181	medial	apical	NOTEST	0.191263	0		#NAME?	0	1	1	no
ENSORLG00000000036	ENSORLG00000000036	CNNM1 (1 of many)	chr1:1378258-1388982	medial	apical	OK	5.56209	7.73164		0.475148	0.971547	0.09295	0.451794	no
ENSORLG00000000038	ENSORLG00000000038	shank2	chr3:2186362-2321929	medial	apical	OK	823.128	712.221		-0.208791	-0.702241	0.22025	0.647725	no
ENSORLG00000000039	ENSORLG00000000039	hoga1	chr1:1390631-1396316	medial	apical	NOTEST	0	0		0	0	1	1	no
ENSORLG00000000040	ENSORLG00000000040	-	chr2:1990111-2038696	medial	apical	NOTEST	0	0		0	0	1	1	no
ENSORLG00000000041	ENSORLG00000000041	ect2	chr4:1836568-1879304	medial	apical	NOTEST	0.0247303	0		#NAME?	0	1	1	no
ENSORLG00000000043	ENSORLG00000000043	-	chr1:1412628-1433530	medial	apical	NOTEST	0	0		0	0	1	1	no
ENSORLG00000000044	ENSORLG00000000044	lcor	chr1:1437256-1519746	medial	apical	NOTEST	0.0389601	0		#NAME?	0	1	1	no
ENSORLG00000000045	ENSORLG00000000045	-	chr3:2513114-2552317	medial	apical	OK	30.0892	34.8401		0.211504	0.742437	0.19245	0.612514	no
ENSORLG00000000046	ENSORLG00000000046	-	chr2:2046819-2052018	medial	apical	NOTEST	0	0		0	0	1	1	no
ENSORLG00000000049	ENSORLG00000000049	mcf2l2	chr4:1770315-1831903	medial	apical	NOTEST	0.127801	0.135635		0.0858323	0	1	1	no
ENSORLG00000000050	ENSORLG00000000050	-	chr2:2066048-2102945	medial	apical	NOTEST	0	0		0	0	1	1	no
ENSORLG00000000052	ENSORLG00000000052	gpd2	chr2:2066048-2102945	medial	apical	NOTEST	0	0		0	0	1	1	no
ENSORLG00000000053	ENSORLG00000000053	rfc4	chr4:1758497-1767275	medial	apical	NOTEST	2.15985	3.36611		0.640152	0	1	1	no
ENSORLG00000000054	ENSORLG00000000054	guca1g	chr3:2582475-2586316	medial	apical	NOTEST	0.193996	0		#NAME?	0	1	1	no
ENSORLG00000000055	ENSORLG00000000055	-	chr1:1576628-1604541	medial	apical	NOTEST	0	0		0	0	1	1	no
ENSORLG00000000057	ENSORLG00000000057	-	chr3:2587957-2590425	medial	apical	NOTEST	0.29885	0		#NAME?	0	1	1	no
ENSORLG00000000058	ENSORLG00000000058	rassf7b	chr3:2604403-2613685	medial	apical	OK	10.8526	10.2716		-0.0793859	-0.169367	0.76755	0.951356	no
ENSORLG00000000059	ENSORLG00000000059	pcbp3	chr2:2179379-2195121	medial	apical	NOTEST	0	0		0	0	1	1	no
ENSORLG00000000060	ENSORLG00000000060	brsk2b	chr3:2628946-2760331	medial	apical	OK	23.6115	24.9915		0.0819515	0.249963	0.65565	0.919904	no
ENSORLG00000000061	ENSORLG00000000061	LRRC3	chr2:2208056-2208836	medial	apical	NOTEST	0	0		0	0	1	1	no
ENSORLG00000000062	ENSORLG00000000062	arhgap19	chr1:1606038-1615290	medial	apical	NOTEST	0.0233138	0		#NAME?	0	1	1	no
ENSORLG00000000063	ENSORLG00000000063	atp7b	chr2:2221932-2262892	medial	apical	NOTEST	0	0		0	0	1	1	no
ENSORLG00000000064	ENSORLG00000000064	si:ch211-133l11.10	chr1:1618264-1620401	medial	apical	NOTEST	0	0		0	0	1	1	no
ENSORLG00000000065	ENSORLG00000000065	abtb2a	chr3:2760726-2783887	medial	apical	NOTEST	3.54158	3.19195		-0.149954	0	1	1	no
ENSORLG00000000066	ENSORLG00000000066	pwp2h	chr2:2263154-2274686	medial	apical	NOTEST	0	0		0	0	1	1	no
ENSORLG00000000068	ENSORLG00000000068	pjvk	chr2:2275603-2284624	medial	apical	NOTEST	0	0		0	0	1	1	no
ENSORLG00000000069	ENSORLG00000000069	HK1 (1 of many)	chr1:1661828-1685594	medial	apical	NOTEST	0	0		0	0	1	1	no
ENSORLG00000000070	ENSORLG00000000070	large2	chr3:3085867-3196787	medial	apical	NOTEST	0	0		0	0	1	1	no
ENSORLG00000000072	ENSORLG00000000072	KIAA0895L	chr3:3733240-3747937	medial	apical	NOTEST	0.409093	0.623891		0.608864	0	1	1	no
ENSORLG00000000073	ENSORLG00000000073	-	chr4:1679538-1727610	medial	apical	NOTEST	0.945002	0.202876		-2.21972	0	1	1	no
ENSORLG00000000074	ENSORLG00000000074	csnk2a2a	chr3:3749465-3753268	medial	apical	NOTEST	0	0		0	0	1	1	no
ENSORLG00000000075	ENSORLG00000000075	myom2a	chr1:1691147-1724828	medial	apical	NOTEST	0.0179263	0		#NAME?	0	1	1	no
ENSORLG00000000076	ENSORLG00000000076	ZNF319	chr3:3758205-3759957	medial	apical	NOTEST	0	0		0	0	1	1	no
ENSORLG00000000077	ENSORLG00000000077	-	chr3:3764428-3784523	medial	apical	NOTEST	0.0245812	0		#NAME?	0	1	1	no
ENSORLG00000000078	ENSORLG00000000078	-	chr1:1691147-1724828	medial	apical	NOTEST	0	0		0	0	1	1	no
ENSORLG00000000079	ENSORLG00000000079	col5a2b	chr2:2299452-2312948	medial	apical	NOTEST	0	0		0	0	1	1	no
ENSORLG00000000080	ENSORLG00000000080	lgsn	chr1:1730291-1732739	medial	apical	NOTEST	0	0		0	0	1	1	no
ENSORLG00000000081	ENSORLG00000000081	ptp4a1	chr1:1740812-1761725	medial	apical	NOTEST	0	0		0	0	1	1	no
ENSORLG00000000083	ENSORLG00000000083	si:dkey-23f9.4	chr1:1762284-1779298	medial	apical	NOTEST	0	0		0	0	1	1	no
ENSORLG00000000084	ENSORLG00000000084	psmd13	chr3:3789148-3800407	medial	apical	NOTEST	0	0		0	0	1	1	no
ENSORLG00000000085	ENSORLG00000000085	mrpl4	chr1:1762284-1779298	medial	apical	NOTEST	0	0		0	0	1	1	no
ENSORLG00000000086	ENSORLG00000000086	sirt3	chr3:3800675-3806777	medial	apical	NOTEST	0	0		0	0	1	1	no
ENSORLG00000000087	ENSORLG00000000087	-	chr4:1679538-1727610	medial	apical	NOTEST	0.255987	0.433842		0.761099	0	1	1	no
ENSORLG00000000088	ENSORLG00000000088	drd4b	chr3:3811498-3834732	medial	apical	NOTEST	0.0247995	0		#NAME?	0	1	1	no
ENSORLG00000000089	ENSORLG00000000089	-	chr1:1762284-1779298	medial	apical	NOTEST	0	0		0	0	1	1	no
ENSORLG00000000091	ENSORLG00000000091	-	chr2:2330481-2339496	medial	apical	NOTEST	0	0		0	0	1	1	no
ENSORLG00000000092	ENSORLG00000000092	ctsd	chr3:3850360-3901851	medial	apical	OK	4.21707	4.45285		0.078488	0.111719	0.84345	0.966357	no
ENSORLG00000000093	ENSORLG00000000093	stx6	chr4:1647088-1656913	medial	apical	NOTEST	0	0		0	0	1	1	no
ENSORLG00000000094	ENSORLG00000000094	abcc10	chr1:1783946-1807257	medial	apical	OK	54.7159	52.9281		-0.0479253	-0.164708	0.77385	0.952041	no
ENSORLG00000000095	ENSORLG00000000095	march7	chr2:2356014-2361537	medial	apical	NOTEST	0	0		0	0	1	1	no
ENSORLG00000000097	ENSORLG00000000097	-	chr3:3948301-3965171	medial	apical	OK	4.56051	5.77639		0.340971	0.742297	0.19665	0.618347	no
ENSORLG00000000098	ENSORLG00000000098	zeb2b	chr2:2770451-2851517	medial	apical	NOTEST	0	0		0	0	1	1	no
ENSORLG00000000099	ENSORLG00000000099	acvr2ab	chr2:3424453-3472574	medial	apical	NOTEST	0	0		0	0	1	1	no
ENSORLG00000000100	ENSORLG00000000100	-	chr3:4008175-4043450	medial	apical	NOTEST	1.4407	1.71256		0.24938	0	1	1	no
ENSORLG00000000101	ENSORLG00000000101	wdr18	chr4:1621132-1646160	medial	apical	OK	5.83905	1.77256	7.61161	-1.7199	-2.79066	5e-05	0.00225489	yes
ENSORLG00000000102	ENSORLG00000000102	sp2	chr1:1810971-1823091	medial	apical	NOTEST	0.404173	0.599711		0.569296	0	1	1	no
ENSORLG00000000103	ENSORLG00000000103	orc4	chr2:3472592-3475685	medial	apical	NOTEST	0	0		0	0	1	1	no
ENSORLG00000000104	ENSORLG00000000104	mbd5	chr2:3490441-3513888	medial	apical	NOTEST	0	0		0	0	1	1	no
ENSORLG00000000105	ENSORLG00000000105	tmem259	chr4:1621132-1646160	medial	apical	NOTEST	2.31191	0.890423		-1.37652	0	1	1	no
ENSORLG00000000106	ENSORLG00000000106	mrpl45	chr1:1896164-1901763	medial	apical	NOTEST	0.107362	0.145058		0.434152	0	1	1	no
ENSORLG00000000107	ENSORLG00000000107	ppip5k1a	chr3:4054260-4097564	medial	apical	NOTEST	0.416426	0.466822		0.164812	0	1	1	no
ENSORLG00000000108	ENSORLG00000000108	KIF5C	chr2:3515310-3540309	medial	apical	NOTEST	0	0		0	0	1	1	no
ENSORLG00000000109	ENSORLG00000000109	med16	chr4:1603798-1619927	medial	apical	NOTEST	1.75102	1.16177		-0.591869	0	1	1	no
ENSORLG00000000110	ENSORLG00000000110	si:ch73-74h11.1	chr4:1573162-1597989	medial	apical	NOTEST	1.4154	0.763905		-0.889747	0	1	1	no
ENSORLG00000000111	ENSORLG00000000111	npepps	chr1:1906135-1925791	medial	apical	OK	10.2015	9.63531		-0.082382	-0.230674	0.6918	0.928641	no
ENSORLG00000000112	ENSORLG00000000112	-	chr2:3549881-3552714	medial	apical	NOTEST	0	0		0	0	1	1	no
ENSORLG00000000115	ENSORLG00000000115	-	chr2:3561806-3575638	medial	apical	NOTEST	0	0		0	0	1	1	no
ENSORLG00000000116	ENSORLG00000000116	tp53bp1	chr3:4150944-4409089	medial	apical	NOTEST	0.026365	0.0410827		0.639907	0	1	1	no
ENSORLG00000000117	ENSORLG00000000117	bzw1a	chr2:3582385-3594943	medial	apical	NOTEST	0	0		0	0	1	1	no
ENSORLG00000000118	ENSORLG00000000118	trappc8	chr4:1513707-1558606	medial	apical	NOTEST	1.14776	0.879449		-0.384145	0	1	1	no
ENSORLG00000000119	ENSORLG00000000119	zgc:77929	chr1:1926671-1927232	medial	apical	NOTEST	1.16622	0.787853		-0.565848	0	1	1	no
ENSORLG00000000120	ENSORLG00000000120	MRPL21	chr1:1928196-1941593	medial	apical	NOTEST	1.73797	2.49809		0.523421	0	1	1	no
ENSORLG00000000122	ENSORLG00000000122	wipf2a	chr1:1928196-1941593	medial	apical	OK	28.7494	26.1133		-0.138749	-0.351881	0.5359	0.870056	no
ENSORLG00000000123	ENSORLG00000000123	tubgcp4	chr3:4150944-4409089	medial	apical	NOTEST	0.449867	0.752981		0.743115	0	1	1	no
ENSORLG00000000125	ENSORLG00000000125	aox1	chr2:3599880-3625359	medial	apical	NOTEST	0	0		0	0	1	1	no
ENSORLG00000000128	ENSORLG00000000128	slc5a9	chr4:1469082-1512628	medial	apical	NOTEST	0	0		0	0	1	1	no
ENSORLG00000000130	ENSORLG00000000130	cdc6	chr1:2064770-2068195	medial	apical	OK	16.8996	15.5741		-0.117847	-0.286088	0.6164	0.908166	no
ENSORLG00000000133	ENSORLG00000000133	sh3bp4a	chr2:3663770-3693864	medial	apical	NOTEST	0	0		0	0	1	1	no
ENSORLG00000000135	ENSORLG00000000135	-	chr2:3757632-3807339	medial	apical	NOTEST	0	0		0	0	1	1	no
ENSORLG00000000136	ENSORLG00000000136	ACTA1	chr1:2075634-2078906	medial	apical	NOTEST	3.03081	2.65556		-0.190687	0	1	1	no
ENSORLG00000000137	ENSORLG00000000137	ahr	chr2:3814167-3852448	medial	apical	NOTEST	0	0		0	0	1	1	no
ENSORLG00000000138	ENSORLG00000000138	cherp	chr4:1437109-1468883	medial	apical	OK	6.00459	8.06179		0.425034	1.07176	0.06115	0.371609	no
ENSORLG00000000140	ENSORLG00000000140	mfsd6a	chr2:3888952-3902564	medial	apical	NOTEST	0	0		0	0	1	1	no
ENSORLG00000000142	ENSORLG00000000142	-	chr24:149410-149782	medial	apical	NOTEST	0	0		0	0	1	1	no
ENSORLG00000000144	ENSORLG00000000144	nab1a	chr2:3942604-3959921	medial	apical	NOTEST	0	0		0	0	1	1	no
ENSORLG00000000145	ENSORLG00000000145	slc13a1	chr6:5536368-5581856	medial	apical	NOTEST	0.0260683	0.0936265		1.84462	0	1	1	no
ENSORLG00000000146	ENSORLG00000000146	nup133	chr1:2082103-2095088	medial	apical	NOTEST	0.648263	0.420554		-0.624288	0	1	1	no
ENSORLG00000000147	ENSORLG00000000147	NBL1	chr5:2063414-2075336	medial	apical	OK	46.5354	43.6872		-0.0911179	-0.184758	0.7445	0.944726	no
ENSORLG00000000149	ENSORLG00000000149	iqgap1	chr3:4150944-4409089	medial	apical	NOTEST	0	0		0	0	1	1	no
ENSORLG00000000151	ENSORLG00000000151	glsa	chr2:3970183-3980587	medial	apical	NOTEST	0	0		0	0	1	1	no
ENSORLG00000000152	ENSORLG00000000152	dohh	chr4:1424357-1434514	medial	apical	NOTEST	0.0228724	0.0726816		1.66798	0	1	1	no
ENSORLG00000000153	ENSORLG00000000153	mib2	chr7:815954-840317	medial	apical	NOTEST	0.73809	0.630752		-0.226725	0	1	1	no
ENSORLG00000000154	ENSORLG00000000154	capzb	chr5:2076195-2109963	medial	apical	NOTEST	0.886423	0.534953		-0.728583	0	1	1	no
ENSORLG00000000155	ENSORLG00000000155	-	chr6:5596799-5622967	medial	apical	NOTEST	0.0278285	0.103494		1.89491	0	1	1	no
ENSORLG00000000157	ENSORLG00000000157	-	chr1:3310671-3317636	medial	apical	NOTEST	0.37418	0.41247		0.140555	0	1	1	no
ENSORLG00000000158	ENSORLG00000000158	spata18	chr4:1385087-1419652	medial	apical	NOTEST	0.0956953	0		#NAME?	0	1	1	no
ENSORLG00000000159	ENSORLG00000000159	-	chr1:2116552-2118478	medial	apical	OK	11.2324	10.3201		-0.122211	-0.175424	0.75325	0.947162	no
ENSORLG00000000160	ENSORLG00000000160	ubiad1	chr7:844963-849382	medial	apical	OK	7.16868	7.67964		0.0993303	0.213163	0.70875	0.932715	no
ENSORLG00000000162	ENSORLG00000000162	stat1a	chr2:3983710-3994593	medial	apical	NOTEST	0	0		0	0	1	1	no
ENSORLG00000000164	ENSORLG00000000164	MMP23B	chr7:853271-902971	medial	apical	NOTEST	0.382731	0.602418		0.654435	0	1	1	no
ENSORLG00000000170	ENSORLG00000000170	-	chr1:1258968-1270156	medial	apical	NOTEST	0	0		0	0	1	1	no
ENSORLG00000000171	ENSORLG00000000171	sgcb	chr4:1357816-1366485	medial	apical	NOTEST	0.280816	0		#NAME?	0	1	1	no
ENSORLG00000000174	ENSORLG00000000174	crtc3	chr3:4150944-4409089	medial	apical	OK	4.8968	2.77114		-0.821359	-0.728848	0.1912	0.612283	no
ENSORLG00000000176	ENSORLG00000000176	-	chr1:2172484-2217605	medial	apical	NOTEST	0.85928	0		#NAME?	0	1	1	no
ENSORLG00000000178	ENSORLG00000000178	adamtsl5	chr3:4150944-4409089	medial	apical	NOTEST	1.52585	1.03697		-0.557239	0	1	1	no
ENSORLG00000000179	ENSORLG00000000179	dcun1d4	chr4:1330621-1339765	medial	apical	NOTEST	0.251088	0.0706247		-1.82995	0	1	1	no
ENSORLG00000000180	ENSORLG00000000180	-	chr3:4519846-4525838	medial	apical	NOTEST	0.994883	2.00015		1.00751	0	1	1	no
ENSORLG00000000181	ENSORLG00000000181	cdk11b	chr7:853271-902971	medial	apical	NOTEST	3.20585	3.32452		0.0524387	0	1	1	no
ENSORLG00000000182	ENSORLG00000000182	celsr2	chr5:2111989-2197553	medial	apical	NOTEST	0.736352	0.670219		-0.135763	0	1	1	no
ENSORLG00000000184	ENSORLG00000000184	tbc1d15	chr6:5629934-5648403	medial	apical	NOTEST	0	0.062437		inf	0	1	1	no
ENSORLG00000000187	ENSORLG00000000187	ociad2	chr4:1318308-1325433	medial	apical	NOTEST	0	0.384693		inf	0	1	1	no
ENSORLG00000000189	ENSORLG00000000189	doc2a	chr8:565548-668518	medial	apical	OK	30.5786	29.6725		-0.0433951	-0.0308208	0.952	0.985844	no
ENSORLG00000000190	ENSORLG00000000190	lingo2a	chr10:5093283-5095125	medial	apical	NOTEST	0	0		0	0	1	1	no
ENSORLG00000000191	ENSORLG00000000191	-	chr2:4412196-4644555	medial	apical	NOTEST	2.45113	3.15974		0.366356	0	1	1	no
ENSORLG00000000197	ENSORLG00000000197	-	chr2:10399657-10404728	medial	apical	NOTEST	0	0		0	0	1	1	no
ENSORLG00000000198	ENSORLG00000000198	armc3	chr1:2219127-2227302	medial	apical	NOTEST	0.555065	1.12876		1.02401	0	1	1	no
ENSORLG00000000200	ENSORLG00000000200	-	chr8:715729-795333	medial	apical	OK	27.9134	33.189		0.249749	0.242074	0.6715	0.925445	no
ENSORLG00000000201	ENSORLG00000000201	cxcl14	chr10:5476271-5484985	medial	apical	OK	244.065	279.064		0.193327	0.684119	0.22285	0.650757	no
ENSORLG00000000203	ENSORLG00000000203	mtch2	chr3:4532926-4545795	medial	apical	OK	55.1262	48.7833		-0.17635	-0.450051	0.4344	0.820898	no
ENSORLG00000000204	ENSORLG00000000204	nlk1	chr8:715729-795333	medial	apical	NOTEST	0.826553	0.35926		-1.20208	0	1	1	no
ENSORLG00000000205	ENSORLG00000000205	-	chr2:4654949-4661348	medial	apical	NOTEST	0	0.676545		inf	0	1	1	no
ENSORLG00000000207	ENSORLG00000000207	fam13b	chr10:5488446-5568731	medial	apical	OK	60.3931	82.4401		0.448961	1.43293	0.0137	0.15161	no
ENSORLG00000000208	ENSORLG00000000208	szrd1	chr7:853271-902971	medial	apical	NOTEST	0	0		0	0	1	1	no
ENSORLG00000000211	ENSORLG00000000211	-	chr2:1863886-1892016	medial	apical	NOTEST	0	0		0	0	1	1	no
ENSORLG00000000212	ENSORLG00000000212	-	chr1:2228257-2239293	medial	apical	OK	33.2081	34.6161		0.0599084	0.139471	0.80965	0.957626	no
ENSORLG00000000213	ENSORLG00000000213	-	chr2:6027745-6031587	medial	apical	NOTEST	0	1.46427		inf	0	1	1	no
ENSORLG00000000214	ENSORLG00000000214	klhl3	chr10:5488446-5568731	medial	apical	OK	5.85094	5.55679		-0.0744163	-0.0723504	0.89845	0.97749	no
ENSORLG00000000216	ENSORLG00000000216	-	chr8:15782019-15782646	medial	apical	OK	8.35174	6.79562		-0.297472	-0.356478	0.51635	0.863896	no
ENSORLG00000000217	ENSORLG00000000217	-	chr9:1418411-1419785	medial	apical	NOTEST	0.199174	0		#NAME?	0	1	1	no
ENSORLG00000000218	ENSORLG00000000218	cdipt	chr8:715729-795333	medial	apical	OK	20.849	24.2911		0.220451	0.140665	0.8051	0.957209	no
ENSORLG00000000219	ENSORLG00000000219	dstyk	chr5:2202290-2235169	medial	apical	OK	21.4594	17.9078		-0.261019	-0.712426	0.2138	0.641424	no
ENSORLG00000000220	ENSORLG00000000220	mnep	chr3:4553506-4559840	medial	apical	NOTEST	2.16942	0.729376		-1.57257	0	1	1	no
ENSORLG00000000222	ENSORLG00000000222	-	chr9:1423222-1430884	medial	apical	NOTEST	0.0399479	0		#NAME?	0	1	1	no
ENSORLG00000000223	ENSORLG00000000223	tph2	chr6:5650539-5678590	medial	apical	NOTEST	0	0		0	0	1	1	no
ENSORLG00000000224	ENSORLG00000000224	-	chr9:1566458-1591358	medial	apical	NOTEST	0	0		0	0	1	1	no
ENSORLG00000000225	ENSORLG00000000225	-	chr2:6052179-6055758	medial	apical	NOTEST	0.0899963	0.0967689		0.104677	0	1	1	no
ENSORLG00000000227	ENSORLG00000000227	-	chr2:6047984-6052154	medial	apical	NOTEST	0.367064	0.46197		0.331766	0	1	1	no
ENSORLG00000000228	ENSORLG00000000228	taok2a	chr8:715729-795333	medial	apical	OK	35.7852	33.7164		-0.0859099	-0.199339	0.72335	0.937705	no
ENSORLG00000000229	ENSORLG00000000229	nuak2	chr5:2247680-2257591	medial	apical	OK	9.99942	8.61779		-0.214526	-0.463835	0.40495	0.808719	no
ENSORLG00000000230	ENSORLG00000000230	maea	chr10:5610754-5622088	medial	apical	OK	12.3891	7.61174		-0.70277	-1.35059	0.0167	0.172701	no
ENSORLG00000000232	ENSORLG00000000232	mphosph6	chr6:5686637-5690028	medial	apical	NOTEST	1.1504	0		#NAME?	0	1	1	no
ENSORLG00000000234	ENSORLG00000000234	fryl	chr4:1214786-1315655	medial	apical	NOTEST	0.0954904	0.127988		0.422584	0	1	1	no
ENSORLG00000000235	ENSORLG00000000235	ccnd3	chr5:2259203-2283749	medial	apical	NOTEST	0	0		0	0	1	1	no
ENSORLG00000000238	ENSORLG00000000238	-	chr8:814864-844301	medial	apical	NOTEST	2.21469	2.79708		0.336818	0	1	1	no
ENSORLG00000000239	ENSORLG00000000239	mc6ast2	chr3:4570940-4589077	medial	apical	NOTEST	0.148233	0		#NAME?	0	1	1	no
ENSORLG00000000240	ENSORLG00000000240	-	chr1:2611046-2624286	medial	apical	NOTEST	0.721938	1.60871		1.15596	0	1	1	no
ENSORLG00000000242	ENSORLG00000000242	-	chr8:858229-876913	medial	apical	NOTEST	1.74143	3.5108		1.01153	0	1	1	no
ENSORLG00000000244	ENSORLG00000000244	atp13a2	chr7:853271-902971	medial	apical	OK	4.13375	4.40669		0.0922443	0.215749	0.70825	0.932715	no
ENSORLG00000000246	ENSORLG00000000246	-	chr9:1595497-1658443	medial	apical	NOTEST	0.234246	0		#NAME?	0	1	1	no
ENSORLG00000000247	ENSORLG00000000247	-	chr2:5414480-5689233	medial	apical	NOTEST	0	0		0	0	1	1	no
ENSORLG00000000248	ENSORLG00000000248	bysl	chr5:2259203-2283749	medial	apical	NOTEST	0	0		0	0	1	1	no
ENSORLG00000000249	ENSORLG00000000249	gpia	chr6:5690651-5699503	medial	apical	NOTEST	0.103056	0		#NAME?	0	1	1	no
ENSORLG00000000251	ENSORLG00000000251	zar1	chr4:1214786-1315655	medial	apical	NOTEST	0.604315	0.32853		-0.879276	0	1	1	no
ENSORLG00000000252	ENSORLG00000000252	-	chr8:881943-893070	medial	apical	NOTEST	0.300699	0		#NAME?	0	1	1	no
ENSORLG00000000253	ENSORLG00000000253	-	chr2:6676926-6745188	medial	apical	OK	5.24555	7.57411		0.529981	0.70025	0.21185	0.639968	no
ENSORLG00000000255	ENSORLG00000000255	slc10a4	chr4:1214786-1315655	medial	apical	NOTEST	0.0919932	0		#NAME?	0	1	1	no
ENSORLG00000000256	ENSORLG00000000256	-	chr8:895182-930972	medial	apical	NOTEST	0.158546	1.29738		3.03263	0	1	1	no
ENSORLG00000000258	ENSORLG00000000258	med20	chr5:2259203-2283749	medial	apical	NOTEST	0.420099	0.908233		1.11233	0	1	1	no
ENSORLG00000000259	ENSORLG00000000259	zgc:136929	chr10:5633643-5663183	medial	apical	NOTEST	0.517727	0.215562		-1.26409	0	1	1	no
ENSORLG00000000260	ENSORLG00000000260	slain2	chr4:1194707-1212862	medial	apical	OK	7.59044	14.9348	22.5252	0.976422	2.35878	5e-05	0.00225489	yes
ENSORLG00000000262	ENSORLG00000000262	-	chr2:5730666-5952931	medial	apical	NOTEST	0.18128	0		#NAME?	0	1	1	no
ENSORLG00000000264	ENSORLG00000000264	-	chr6:5703592-5726378	medial	apical	NOTEST	0.337918	0.0789878		-2.09697	0	1	1	no
ENSORLG00000000265	ENSORLG00000000265	si:dkey-174n20.1	chr9:1669583-1670827	medial	apical	NOTEST	0.504658	0		#NAME?	0	1	1	no
ENSORLG00000000267	ENSORLG00000000267	-	chr7:904712-913781	medial	apical	NOTEST	0.154332	2.62166		4.08638	0	1	1	no
ENSORLG00000000268	ENSORLG00000000268	JMJD8	chr8:895182-930972	medial	apical	NOTEST	0.42014	0.766964		0.868288	0	1	1	no
ENSORLG00000000269	ENSORLG00000000269	usp49	chr5:2288437-2293452	medial	apical	NOTEST	0.0246286	0.234787		3.25294	0	1	1	no
ENSORLG00000000271	ENSORLG00000000271	-	chr6:5734047-5735509	medial	apical	NOTEST	0	0		0	0	1	1	no
ENSORLG00000000272	ENSORLG00000000272	-	chr18:25506216-25509104	medial	apical	NOTEST	0	0		0	0	1	1	no
ENSORLG00000000273	ENSORLG00000000273	npy8ar	chr12:980889-998198	medial	apical	OK	4.06314	8.64166	12.7048	1.08871	1.87938	0.00145	0.0333222	yes
ENSORLG00000000274	ENSORLG00000000274	otud3	chr7:933266-935771	medial	apical	OK	43.2372	51.8989		0.26343	0.697001	0.22235	0.649613	no
ENSORLG00000000275	ENSORLG00000000275	spon2b	chr10:5701115-5717675	medial	apical	OK	18.7358	23.5271		0.328525	1.01465	0.0751	0.4095	no
ENSORLG00000000277	ENSORLG00000000277	tmcc2	chr5:2296532-2305537	medial	apical	NOTEST	0	0		0	0	1	1	no
ENSORLG00000000279	ENSORLG00000000279	ddx39aa	chr1:2611046-2624286	medial	apical	NOTEST	1.77304	2.70667		0.610294	0	1	1	no
ENSORLG00000000280	ENSORLG00000000280	march5l	chr12:1017543-1021633	medial	apical	OK	32.5719	35.4977		0.124099	0.281097	0.62755	0.912717	no
ENSORLG00000000281	ENSORLG00000000281	kmt2ba	chr11:698798-729648	medial	apical	OK	12.9078	12.2361		-0.0770985	-0.241631	0.6727	0.925445	no
ENSORLG00000000282	ENSORLG00000000282	-	chr8:895182-930972	medial	apical	NOTEST	0	0		0	0	1	1	no
ENSORLG00000000283	ENSORLG00000000283	ano1	chr3:4614796-4671922	medial	apical	OK	6.59445	5.48863		-0.264808	-0.598194	0.2899	0.722702	no
ENSORLG00000000284	ENSORLG00000000284	cdkn1a	chr5:2309277-2310258	medial	apical	OK	153.062	176.404		0.204769	0.567361	0.3292	0.758456	no
ENSORLG00000000285	ENSORLG00000000285	igsf9bb	chr14:1549856-1680439	medial	apical	NOTEST	0.041601	0		#NAME?	0	1	1	no
ENSORLG00000000286	ENSORLG00000000286	-	chr11:730939-732761	medial	apical	NOTEST	0.0901968	0.360152		1.99746	0	1	1	no
ENSORLG00000000287	ENSORLG00000000287	bcas2	chr7:943750-946013	medial	apical	OK	82.8165	100.361		0.277207	0.860826	0.1313	0.526077	no
ENSORLG00000000288	ENSORLG00000000288	-	chr9:1672118-1691062	medial	apical	NOTEST	0	0		0	0	1	1	no
ENSORLG00000000289	ENSORLG00000000289	fgf19	chr3:4727632-4737903	medial	apical	NOTEST	0	0		0	0	1	1	no
ENSORLG00000000290	ENSORLG00000000290	-	chr8:895182-930972	medial	apical	NOTEST	0.387515	0.245209		-0.660239	0	1	1	no
ENSORLG00000000292	ENSORLG00000000292	srsf3b	chr5:2320343-2326013	medial	apical	NOTEST	2.54668	2.34506		-0.118993	0	1	1	no
ENSORLG00000000293	ENSORLG00000000293	si:ch211-255i20.3	chr10:5717898-5721528	medial	apical	NOTEST	0.742808	0.823763		0.149241	0	1	1	no
ENSORLG00000000294	ENSORLG00000000294	kctd9b	chr12:1022739-1027315	medial	apical	NOTEST	2.2084	2.64918		0.262539	0	1	1	no
ENSORLG00000000295	ENSORLG00000000295	fgf4	chr3:4760560-4767114	medial	apical	NOTEST	0	1.28067		inf	0	1	1	no
ENSORLG00000000297	ENSORLG00000000297	ndufv1	chr11:733373-739613	medial	apical	NOTEST	1.77343	1.39141		-0.35	0	1	1	no
ENSORLG00000000299	ENSORLG00000000299	kremen1	chr9:1733666-1762813	medial	apical	NOTEST	0	0		0	0	1	1	no
ENSORLG00000000300	ENSORLG00000000300	si:ch211-239f4.1	chr1:2635047-2659563	medial	apical	NOTEST	0.782254	1.2112		0.630728	0	1	1	no
ENSORLG00000000301	ENSORLG00000000301	ecm1a	chr11:763323-764336	medial	apical	NOTEST	1.53961	2.0553		0.416788	0	1	1	no
ENSORLG00000000302	ENSORLG00000000302	fgf3	chr3:4772078-4774258	medial	apical	NOTEST	0.448183	0.169338		-1.40418	0	1	1	no
ENSORLG00000000303	ENSORLG00000000303	-	chr15:1696608-1733188	medial	apical	NOTEST	0	0		0	0	1	1	no
ENSORLG00000000304	ENSORLG00000000304	-	chr9:1667368-1668793	medial	apical	NOTEST	0.0804134	0		#NAME?	0	1	1	no
ENSORLG00000000305	ENSORLG00000000305	fgfrl1a	chr10:5743524-5829770	medial	apical	NOTEST	1	1.55601		0.637845	0	1	1	no
ENSORLG00000000306	ENSORLG00000000306	-	chr22:316711-329038	medial	apical	OK	146.924	151.789		0.0469946	0.161386	0.7709	0.951792	no
ENSORLG00000000310	ENSORLG00000000310	pigq	chr8:937439-945907	medial	apical	NOTEST	0.0324831	0		#NAME?	0	1	1	no
ENSORLG00000000311	ENSORLG00000000311	emb	chr9:1772021-1782437	medial	apical	NOTEST	0.260745	0.0289539		-3.17081	0	1	1	no
ENSORLG00000000312	ENSORLG00000000312	arhgap32b	chr14:1883730-1938253	medial	apical	OK	7.18271	5.07371		-0.501489	-1.36998	0.0149	0.161027	no
ENSORLG00000000313	ENSORLG00000000313	-	chr1:2665882-2668918	medial	apical	NOTEST	0.747051	1.60406		1.10245	0	1	1	no
ENSORLG00000000314	ENSORLG00000000314	-	chr19:13570-31320	medial	apical	NOTEST	0	0		0	0	1	1	no
ENSORLG00000000315	ENSORLG00000000315	-	chr1:2671719-2677227	medial	apical	NOTEST	0	0		0	0	1	1	no
ENSORLG00000000316	ENSORLG00000000316	eef2kmt	chr8:946332-954780	medial	apical	NOTEST	0.129742	0		#NAME?	0	1	1	no
ENSORLG00000000317	ENSORLG00000000317	ccnd1	chr3:4926156-4932457	medial	apical	NOTEST	0.404331	0.387057		-0.062988	0	1	1	no
ENSORLG00000000318	ENSORLG00000000318	anapc4	chr4:1186185-1193087	medial	apical	OK	25.1614	28.2512		0.167099	0.494334	0.3847	0.793204	no
ENSORLG00000000320	ENSORLG00000000320	psmd4a	chr11:776024-779412	medial	apical	NOTEST	0.495372	0.422772		-0.22863	0	1	1	no
ENSORLG00000000321	ENSORLG00000000321	fgfr1b	chr12:1041295-1049532	medial	apical	NOTEST	0.213334	0.35208		0.722788	0	1	1	no
ENSORLG00000000322	ENSORLG00000000322	-	chr15:1696608-1733188	medial	apical	NOTEST	0	0		0	0	1	1	no
ENSORLG00000000323	ENSORLG00000000323	hsd11b2	chr3:5151446-5174483	medial	apical	NOTEST	0.944128	1.01056		0.0981056	0	1	1	no
ENSORLG00000000324	ENSORLG00000000324	-	chr14:1957753-1960533	medial	apical	NOTEST	0.108412	0.282806		1.38328	0	1	1	no
ENSORLG00000000325	ENSORLG00000000325	trim33	chr7:952845-977536	medial	apical	OK	15.7653	17.5877		0.157818	0.46005	0.4158	0.812176	no
ENSORLG00000000326	ENSORLG00000000326	-	chr15:1738752-1741744	medial	apical	NOTEST	0	0		0	0	1	1	no
ENSORLG00000000328	ENSORLG00000000328	stc1l	chr12:1050866-1054758	medial	apical	NOTEST	0	0		0	0	1	1	no
ENSORLG00000000329	ENSORLG00000000329	zdhhc1	chr3:5203204-5221919	medial	apical	OK	17.5459	18.3083		0.0613617	0.14351	0.80105	0.95637	no
ENSORLG00000000330	ENSORLG00000000330	malt1	chr9:1784065-1795754	medial	apical	OK	83.1975	71.2558		-0.223533	-0.759987	0.18345	0.601438	no
ENSORLG00000000332	ENSORLG00000000332	alg1	chr8:946332-954780	medial	apical	NOTEST	0.0941576	0.299204		1.66798	0	1	1	no
ENSORLG00000000334	ENSORLG00000000334	tppp3	chr3:5243141-5250946	medial	apical	NOTEST	0	0		0	0	1	1	no
ENSORLG00000000335	ENSORLG00000000335	slit3	chr10:5909835-6207081	medial	apical	NOTEST	0.155068	0.178267		0.201135	0	1	1	no
ENSORLG00000000336	ENSORLG00000000336	-	chr13:711832-759798	medial	apical	NOTEST	0	0		0	0	1	1	no
ENSORLG00000000337	ENSORLG00000000337	kptn	chr14:1967097-1978439	medial	apical	NOTEST	0.320163	0.388373		0.278637	0	1	1	no
ENSORLG00000000338	ENSORLG00000000338	prlrb	chr9:1808607-1821032	medial	apical	NOTEST	2.09147	0.972061		-1.1054	0	1	1	no
ENSORLG00000000339	ENSORLG00000000339	aqp10b	chr11:787373-793862	medial	apical	NOTEST	0.02245	0.0547397		1.28587	0	1	1	no
ENSORLG00000000341	ENSORLG00000000341	pqlc2	chr7:978491-980854	medial	apical	OK	5.81121	3.02593		-0.941461	-1.03348	0.07145	0.39968	no
ENSORLG00000000342	ENSORLG00000000342	flr	chr8:960880-970550	medial	apical	NOTEST	0	0.081077		inf	0	1	1	no
ENSORLG00000000343	ENSORLG00000000343	secisbp2	chr9:1824697-1836892	medial	apical	OK	6.45959	3.45373	9.91332	-0.903287	-1.8691	0.0013	0.0306984	yes
ENSORLG00000000344	ENSORLG00000000344	P2RY14 (1 of many)	chr13:788110-795985	medial	apical	NOTEST	3.27161	1.17345		-1.47924	0	1	1	no
ENSORLG00000000345	ENSORLG00000000345	palld	chr4:1070884-1182687	medial	apical	OK	20.321	21.6433		0.0909505	0.267057	0.64305	0.914826	no
ENSORLG00000000346	ENSORLG00000000346	-	chr9:1847205-1848928	medial	apical	NOTEST	0	0		0	0	1	1	no
ENSORLG00000000347	ENSORLG00000000347	P2RY14 (1 of many)	chr13:807165-812045	medial	apical	NOTEST	0	0.522245		inf	0	1	1	no
ENSORLG00000000348	ENSORLG00000000348	-	chr10:6271797-6273237	medial	apical	NOTEST	0	0		0	0	1	1	no
ENSORLG00000000349	ENSORLG00000000349	si:ch211-76l23.4	chr8:972296-976105	medial	apical	NOTEST	0	0		0	0	1	1	no
ENSORLG00000000350	ENSORLG00000000350	nova1	chr14:1980905-2023262	medial	apical	NOTEST	0.0531825	0.129711		1.28627	0	1	1	no
ENSORLG00000000351	ENSORLG00000000351	mcoln1a	chr1:2680407-2699572	medial	apical	NOTEST	0.0233349	0		#NAME?	0	1	1	no
ENSORLG00000000352	ENSORLG00000000352	gsg1l	chr8:1006141-1023180	medial	apical	NOTEST	0.227164	0		#NAME?	0	1	1	no
ENSORLG00000000353	ENSORLG00000000353	-	chr9:1851687-1866218	medial	apical	NOTEST	0	0		0	0	1	1	no
ENSORLG00000000355	ENSORLG00000000355	AHCYL1	chr5:2327418-2350444	medial	apical	OK	123.74	128.085		0.0497848	0.175974	0.76245	0.950244	no
ENSORLG00000000356	ENSORLG00000000356	lamb1a	chr6:5738098-5784235	medial	apical	NOTEST	0.416001	0.353037		-0.23677	0	1	1	no
ENSORLG00000000357	ENSORLG00000000357	-	chr10:6280232-6284680	medial	apical	NOTEST	0.0685161	0.26951		1.97582	0	1	1	no
ENSORLG00000000358	ENSORLG00000000358	brpf3b	chr7:989014-1001978	medial	apical	OK	335.842	334.347		-0.00643551	-0.0210287	0.97215	0.991096	no
ENSORLG00000000359	ENSORLG00000000359	cbr4	chr4:1070884-1182687	medial	apical	NOTEST	0.490662	0.826526		0.75233	0	1	1	no
ENSORLG00000000360	ENSORLG00000000360	si:ch211-214c7.5	chr1:2700814-2727179	medial	apical	NOTEST	0	0		0	0	1	1	no
ENSORLG00000000361	ENSORLG00000000361	pcca	chr15:1746673-1766930	medial	apical	NOTEST	0	0		0	0	1	1	no
ENSORLG00000000363	ENSORLG00000000363	gpr171	chr13:828130-835640	medial	apical	NOTEST	0.169167	0.191089		0.175795	0	1	1	no
ENSORLG00000000364	ENSORLG00000000364	-	chr12:1070076-1090366	medial	apical	OK	4.31906	2.00696	6.32602	-1.10571	-2.00301	0.00105	0.0260244	yes
ENSORLG00000000365	ENSORLG00000000365	-	chr3:5283851-5304338	medial	apical	NOTEST	0.877626	1.48297		0.756808	0	1	1	no
ENSORLG00000000366	ENSORLG00000000366	-	chr10:6288530-6316378	medial	apical	NOTEST	0.590479	0.283213		-1.06	0	1	1	no
ENSORLG00000000367	ENSORLG00000000367	nitr20	chr10:6288530-6316378	medial	apical	OK	41.3577	34.5512		-0.25942	-0.744036	0.19495	0.616075	no
ENSORLG00000000368	ENSORLG00000000368	triap1	chr13:944462-944687	medial	apical	NOTEST	0	0		0	0	1	1	no
ENSORLG00000000369	ENSORLG00000000369	CAPNS1	chr14:2038988-2044214	medial	apical	NOTEST	1.09057	0.709705		-0.619789	0	1	1	no
ENSORLG00000000371	ENSORLG00000000371	-	chr3:5317970-5336143	medial	apical	NOTEST	0.40425	0.396261		-0.0287941	0	1	1	no
ENSORLG00000000372	ENSORLG00000000372	zenzai	chr9:1875738-1888290	medial	apical	NOTEST	0.117808	0.0490325		-1.26462	0	1	1	no
ENSORLG00000000375	ENSORLG00000000375	cetp	chr6:5801804-5823927	medial	apical	OK	6.22586	7.43248		0.255571	0.449654	0.4371	0.821952	no
ENSORLG00000000378	ENSORLG00000000378	dlb	chr14:2066737-2071913	medial	apical	NOTEST	2.48	2.09647		-0.242372	0	1	1	no
ENSORLG00000000379	ENSORLG00000000379	sh3rf1	chr4:1070884-1182687	medial	apical	OK	3.33863	3.80601		0.18902	0.175652	0.76455	0.950583	no
ENSORLG00000000381	ENSORLG00000000381	nitr22	chr10:6340681-6346934	medial	apical	OK	42.5104	23.2417	65.7521	-0.871101	-2.1549	0.0002	0.00685486	yes
ENSORLG00000000382	ENSORLG00000000382	-	chr14:2079850-2086391	medial	apical	OK	80.2432	72.8205		-0.140033	-0.419339	0.4589	0.831747	no
ENSORLG00000000384	ENSORLG00000000384	-	chr9:1919061-1922638	medial	apical	NOTEST	0	0		0	0	1	1	no
ENSORLG00000000385	ENSORLG00000000385	pkn1a	chr1:2729374-2778575	medial	apical	OK	20.4374	30.0594	50.4968	0.556604	1.7608	0.0015	0.0342091	yes
ENSORLG00000000386	ENSORLG00000000386	wdr45	chr12:1090447-1097679	medial	apical	OK	14.6435	10.3796		-0.496507	-1.30587	0.0186	0.184401	no
ENSORLG00000000388	ENSORLG00000000388	herpud1	chr6:5826531-5832089	medial	apical	OK	38.6542	37.5925		-0.0401785	-0.102077	0.8568	0.968002	no
ENSORLG00000000389	ENSORLG00000000389	-	chr10:6352108-6353330	medial	apical	NOTEST	0	0		0	0	1	1	no
ENSORLG00000000391	ENSORLG00000000391	zgc:136461	chr3:5351804-5353360	medial	apical	NOTEST	1.29853	0.853419		-0.605555	0	1	1	no
ENSORLG00000000393	ENSORLG00000000393	mapk13	chr7:1002262-1020306	medial	apical	OK	10.6709	8.86639		-0.267268	-0.466265	0.41535	0.812176	no
ENSORLG00000000394	ENSORLG00000000394	supt5h	chr13:946086-959852	medial	apical	NOTEST	0	0		0	0	1	1	no
ENSORLG00000000395	ENSORLG00000000395	ppp1r14aa	chr14:2102771-2111637	medial	apical	NOTEST	1.51265	2.05066		0.439018	0	1	1	no
ENSORLG00000000397	ENSORLG00000000397	strip1	chr5:2351229-2365065	medial	apical	NOTEST	1.1644	1.37958		0.244635	0	1	1	no
ENSORLG00000000398	ENSORLG00000000398	agrp	chr3:5353846-5356433	medial	apical	NOTEST	1.56665	2.99233		0.933586	0	1	1	no
ENSORLG00000000400	ENSORLG00000000400	bcl7a	chr12:1210968-1214680	medial	apical	NOTEST	0.193994	0		#NAME?	0	1	1	no
ENSORLG00000000401	ENSORLG00000000401	siat8c2	chr9:1923927-1930131	medial	apical	NOTEST	0	0		0	0	1	1	no
ENSORLG00000000402	ENSORLG00000000402	piezo1	chr15:1771527-1811903	medial	apical	NOTEST	0	0		0	0	1	1	no
ENSORLG00000000403	ENSORLG00000000403	fam19a5l	chr7:1067668-1119681	medial	apical	OK	7.02926	7.06705		0.00773607	0.00663163	0.926	0.982228	no
ENSORLG00000000408	ENSORLG00000000408	map2k7	chr1:2779424-2799133	medial	apical	NOTEST	0	0		0	0	1	1	no
ENSORLG00000000410	ENSORLG00000000410	chp2	chr13:970035-972249	medial	apical	NOTEST	0	0		0	0	1	1	no
ENSORLG00000000411	ENSORLG00000000411	cdt1	chr15:1823797-1829302	medial	apical	NOTEST	0	0		0	0	1	1	no
ENSORLG00000000412	ENSORLG00000000412	slc12a3	chr6:5833499-5848993	medial	apical	OK	13.6191	12.108		-0.169673	-0.452818	0.43685	0.821952	no
ENSORLG00000000415	ENSORLG00000000415	dlc	chr13:997779-1067456	medial	apical	NOTEST	0.0592775	0.112665		0.92648	0	1	1	no
ENSORLG00000000417	ENSORLG00000000417	-	chr9:1935526-1940777	medial	apical	NOTEST	0.0580198	0.0902009		0.636597	0	1	1	no
ENSORLG00000000418	ENSORLG00000000418	ubap2l	chr11:793978-813379	medial	apical	NOTEST	0.0806841	0.044367		-0.862796	0	1	1	no
ENSORLG00000000419	ENSORLG00000000419	-	chr6:5860831-5862727	medial	apical	NOTEST	0.318795	0.220665		-0.530771	0	1	1	no
ENSORLG00000000420	ENSORLG00000000420	-	chr2:4847777-4851864	medial	apical	OK	6.10493	4.16736		-0.550841	-0.706887	0.2112	0.638819	no
ENSORLG00000000421	ENSORLG00000000421	-	chr5:2367225-2383220	medial	apical	NOTEST	0.0829667	0.196069		1.24076	0	1	1	no
ENSORLG00000000423	ENSORLG00000000423	eif2b1	chr12:1217108-1243147	medial	apical	NOTEST	0.530406	0.585948		0.143677	0	1	1	no
ENSORLG00000000427	ENSORLG00000000427	timm50	chr13:1069231-1084233	medial	apical	NOTEST	0.205569	0.191496		-0.102307	0	1	1	no
ENSORLG00000000429	ENSORLG00000000429	-	chr6:3735251-3738272	medial	apical	NOTEST	0	0		0	0	1	1	no
ENSORLG00000000433	ENSORLG00000000433	-	chr5:2402390-2404865	medial	apical	OK	6.76174	3.31277	10.0745	-1.02936	-1.89041	0.00135	0.031507	yes
ENSORLG00000000434	ENSORLG00000000434	SETD4	chr15:1829981-1845415	medial	apical	NOTEST	0	0		0	0	1	1	no
ENSORLG00000000437	ENSORLG00000000437	-	chr5:2416403-2417852	medial	apical	OK	4.35707	2.92755		-0.573661	-0.801363	0.16175	0.569194	no
ENSORLG00000000438	ENSORLG00000000438	GPR61 (1 of many)	chr5:2430733-2437422	medial	apical	NOTEST	1.19797	1.66537		0.475247	0	1	1	no
ENSORLG00000000439	ENSORLG00000000439	-	chr4:1040494-1044496	medial	apical	NOTEST	0.592813	0.769384		0.376127	0	1	1	no
ENSORLG00000000441	ENSORLG00000000441	-	chr10:6563011-6603954	medial	apical	NOTEST	0.0726767	0		#NAME?	0	1	1	no
ENSORLG00000000442	ENSORLG00000000442	zgc:123238	chr11:816292-818526	medial	apical	NOTEST	0	0.421654		inf	0	1	1	no
ENSORLG00000000444	ENSORLG00000000444	-	chr11:819741-823143	medial	apical	NOTEST	0	0		0	0	1	1	no
ENSORLG00000000445	ENSORLG00000000445	mark4a	chr14:2147731-2169437	medial	apical	NOTEST	0	0		0	0	1	1	no
ENSORLG00000000447	ENSORLG00000000447	clip3	chr13:1099734-1126374	medial	apical	NOTEST	0	0.11454		inf	0	1	1	no
ENSORLG00000000449	ENSORLG00000000449	ckma	chr14:2169760-2175494	medial	apical	NOTEST	0	0		0	0	1	1	no
ENSORLG00000000450	ENSORLG00000000450	-	chr6:5913503-5920103	medial	apical	NOTEST	0.22694	0		#NAME?	0	1	1	no
ENSORLG00000000451	ENSORLG00000000451	usp46	chr4:989366-1013911	medial	apical	NOTEST	0.317288	0.353462		0.155764	0	1	1	no
ENSORLG00000000452	ENSORLG00000000452	cbr1	chr15:1829981-1845415	medial	apical	NOTEST	0	0		0	0	1	1	no
ENSORLG00000000453	ENSORLG00000000453	ampd2a	chr5:2439778-2474587	medial	apical	OK	30.8754	31.8034		0.0427225	0.134948	0.82175	0.960005	no
ENSORLG00000000455	ENSORLG00000000455	cgnb	chr11:828593-851581	medial	apical	NOTEST	0	0		0	0	1	1	no
ENSORLG00000000457	ENSORLG00000000457	mxtx1	chr15:1848054-1850155	medial	apical	NOTEST	0	0		0	0	1	1	no
ENSORLG00000000459	ENSORLG00000000459	nccrp1	chr14:2188923-2192722	medial	apical	NOTEST	0.339329	0		#NAME?	0	1	1	no
ENSORLG00000000460	ENSORLG00000000460	ugt2b3	chr9:1951150-1958852	medial	apical	NOTEST	0.0314666	0		#NAME?	0	1	1	no
ENSORLG00000000461	ENSORLG00000000461	dldh	chr6:5925277-5938224	medial	apical	OK	2.95591	3.97062		0.425761	0.694455	0.23035	0.659494	no
ENSORLG00000000462	ENSORLG00000000462	-	chr12:1368782-1372867	medial	apical	NOTEST	0.540077	1.94558		1.84897	0	1	1	no
ENSORLG00000000466	ENSORLG00000000466	tal2	chr9:1964499-1964838	medial	apical	OK	79.8168	74.8917		-0.0918863	-0.167535	0.77085	0.951792	no
ENSORLG00000000467	ENSORLG00000000467	rasl11b	chr4:919077-920393	medial	apical	NOTEST	1.9216	1.1375		-0.756443	0	1	1	no
ENSORLG00000000468	ENSORLG00000000468	-	chr15:1857866-1867586	medial	apical	NOTEST	0	0		0	0	1	1	no
ENSORLG00000000469	ENSORLG00000000469	zgc:162698	chr13:1207602-1220352	medial	apical	NOTEST	0.0692672	0.142478		1.0405	0	1	1	no
ENSORLG00000000470	ENSORLG00000000470	ptpn11a	chr12:1404119-1425979	medial	apical	OK	15.6542	14.4662		-0.113863	-0.179105	0.7571	0.948598	no
ENSORLG00000000474	ENSORLG00000000474	slc8a2a	chr14:2195475-2232070	medial	apical	NOTEST	0.997117	1.1076		0.151608	0	1	1	no
ENSORLG00000000475	ENSORLG00000000475	scfd2	chr4:791131-915162	medial	apical	OK	14.1714	17.9798		0.343391	0.852948	0.1357	0.533744	no
ENSORLG00000000476	ENSORLG00000000476	gpc2	chr10:6563011-6603954	medial	apical	NOTEST	0.0359319	0		#NAME?	0	1	1	no
ENSORLG00000000477	ENSORLG00000000477	pbxip1a	chr11:883181-893890	medial	apical	OK	130.752	119.142		-0.134151	-0.461533	0.41895	0.814042	no
ENSORLG00000000478	ENSORLG00000000478	grm8b	chr6:5999738-6104477	medial	apical	NOTEST	0.116604	0		#NAME?	0	1	1	no
ENSORLG00000000479	ENSORLG00000000479	-	chr1:2816150-2822262	medial	apical	OK	10.6618	8.9707		-0.249156	-0.54062	0.34505	0.764186	no
ENSORLG00000000480	ENSORLG00000000480	STK32C	chr15:1895810-1986692	medial	apical	NOTEST	0	0		0	0	1	1	no
ENSORLG00000000484	ENSORLG00000000484	mtor (1 of many)	chr7:1199321-1216278	medial	apical	NOTEST	0.0682801	0		#NAME?	0	1	1	no
ENSORLG00000000486	ENSORLG00000000486	-	chr14:2246828-2263411	medial	apical	NOTEST	0.03236	0		#NAME?	0	1	1	no
ENSORLG00000000487	ENSORLG00000000487	eps8l3a	chr5:2477345-2483871	medial	apical	NOTEST	1.13057	1.61718		0.516433	0	1	1	no
ENSORLG00000000488	ENSORLG00000000488	krt1-c5	chr9:1988297-1995701	medial	apical	NOTEST	0.669508	0.36219		-0.886356	0	1	1	no
ENSORLG00000000489	ENSORLG00000000489	pwwp2b	chr15:1989665-1998415	medial	apical	NOTEST	0	0		0	0	1	1	no
ENSORLG00000000490	ENSORLG00000000490	-	chr13:1231976-1239636	medial	apical	NOTEST	0	0		0	0	1	1	no
ENSORLG00000000491	ENSORLG00000000491	-	chr10:6604101-6628581	medial	apical	NOTEST	0	0		0	0	1	1	no
ENSORLG00000000492	ENSORLG00000000492	lnx1	chr4:716513-762275	medial	apical	NOTEST	0.165446	0.157337		-0.0725108	0	1	1	no
ENSORLG00000000493	ENSORLG00000000493	pot1	chr6:6114349-6177353	medial	apical	NOTEST	0.193618	0.156063		-0.311086	0	1	1	no
ENSORLG00000000494	ENSORLG00000000494	dpm3	chr11:1109878-1110157	medial	apical	NOTEST	1.82233	0		#NAME?	0	1	1	no
ENSORLG00000000498	ENSORLG00000000498	si:ch211-236k19.2	chr9:2004119-2011448	medial	apical	OK	7.7528	6.85081		-0.178441	-0.399018	0.4934	0.854199	no
ENSORLG00000000499	ENSORLG00000000499	PITPNB (1 of many)	chr12:1446308-1452714	medial	apical	NOTEST	0.559324	1.3032		1.2203	0	1	1	no
ENSORLG00000000501	ENSORLG00000000501	-	chr6:6192338-6199886	medial	apical	OK	49.9358	54.753		0.132862	0.436943	0.44185	0.824329	no
ENSORLG00000000502	ENSORLG00000000502	angptl7	chr7:1185313-1187382	medial	apical	NOTEST	0.263277	0.207755		-0.341696	0	1	1	no
ENSORLG00000000503	ENSORLG00000000503	-	chr2:8787303-9286651	medial	apical	NOTEST	0	0		0	0	1	1	no
ENSORLG00000000507	ENSORLG00000000507	slc25a38b	chr1:2823472-2833754	medial	apical	OK	5.39679	6.79107		0.331539	0.821215	0.1448	0.547832	no
ENSORLG00000000509	ENSORLG00000000509	ptgs1 (1 of many)	chr9:2026496-2038137	medial	apical	NOTEST	0.776266	0.908458		0.22687	0	1	1	no
ENSORLG00000000510	ENSORLG00000000510	-	chr14:2277622-2324804	medial	apical	NOTEST	0.00824303	0.0390089		2.24256	0	1	1	no
ENSORLG00000000511	ENSORLG00000000511	irf6	chr5:2484705-2491324	medial	apical	NOTEST	0	0		0	0	1	1	no
ENSORLG00000000514	ENSORLG00000000514	-	chr3:5428376-5447491	medial	apical	NOTEST	0	0		0	0	1	1	no
ENSORLG00000000515	ENSORLG00000000515	hyal4	chr6:6206470-6229953	medial	apical	OK	49.8775	55.7435		0.160415	0.531447	0.34955	0.766131	no
ENSORLG00000000518	ENSORLG00000000518	-	chr1:2851404-2852520	medial	apical	NOTEST	0.213594	0		#NAME?	0	1	1	no
ENSORLG00000000520	ENSORLG00000000520	trim46b	chr11:1123409-1138492	medial	apical	NOTEST	0.0823398	0.0244849		-1.7497	0	1	1	no
ENSORLG00000000521	ENSORLG00000000521	ubn2a	chr1:2870774-2896451	medial	apical	NOTEST	0.153901	0.140415		-0.132307	0	1	1	no
ENSORLG00000000523	ENSORLG00000000523	brap	chr12:1484483-1500000	medial	apical	NOTEST	3.46096	2.50978		-0.463611	0	1	1	no
ENSORLG00000000524	ENSORLG00000000524	hyal6	chr6:6238286-6244609	medial	apical	NOTEST	0.218882	0		#NAME?	0	1	1	no
ENSORLG00000000526	ENSORLG00000000526	wscd1b	chr14:2440347-2467118	medial	apical	NOTEST	1.7735	1.94974		0.136686	0	1	1	no
ENSORLG00000000527	ENSORLG00000000527	mcm7	chr10:6628649-6635846	medial	apical	NOTEST	0	0		0	0	1	1	no
ENSORLG00000000528	ENSORLG00000000528	zgc:101731	chr13:1239641-1253074	medial	apical	NOTEST	0.109816	0		#NAME?	0	1	1	no
ENSORLG00000000529	ENSORLG00000000529	agrn	chr7:1316094-1472341	medial	apical	OK	26.5173	26.4592		-0.00316761	-0.0106656	0.98395	0.993892	no
ENSORLG00000000530	ENSORLG00000000530	WDR77	chr5:2513350-2529211	medial	apical	NOTEST	0	0		0	0	1	1	no
ENSORLG00000000531	ENSORLG00000000531	s100a10a	chr11:1218198-1218562	medial	apical	NOTEST	0.803446	1.24908		0.636597	0	1	1	no
ENSORLG00000000532	ENSORLG00000000532	tor4aa	chr12:1507043-1509765	medial	apical	OK	15.3607	12.8105		-0.261919	-0.537906	0.35865	0.774643	no
ENSORLG00000000533	ENSORLG00000000533	iqub	chr6:6251282-6268523	medial	apical	NOTEST	0	0		0	0	1	1	no
ENSORLG00000000534	ENSORLG00000000534	-	chr2:8787303-9286651	medial	apical	NOTEST	0	0		0	0	1	1	no
ENSORLG00000000538	ENSORLG00000000538	-	chr10:6638162-6640245	medial	apical	NOTEST	0	0		0	0	1	1	no
ENSORLG00000000539	ENSORLG00000000539	-	chr13:1253094-1258140	medial	apical	NOTEST	1.31358	1.26275		-0.0569323	0	1	1	no
ENSORLG00000000540	ENSORLG00000000540	INPP5A	chr15:2044414-2161975	medial	apical	NOTEST	0.330632	0.505815		0.613382	0	1	1	no
ENSORLG00000000542	ENSORLG00000000542	-	chr3:5546151-5580829	medial	apical	NOTEST	0	0		0	0	1	1	no
ENSORLG00000000544	ENSORLG00000000544	-	chr13:1497999-1659526	medial	apical	NOTEST	2.11243	1.86991		-0.175939	0	1	1	no
ENSORLG00000000545	ENSORLG00000000545	tnni2a.1	chr6:6284070-6297842	medial	apical	NOTEST	0	0		0	0	1	1	no
ENSORLG00000000547	ENSORLG00000000547	pmpca	chr9:2062536-2076858	medial	apical	NOTEST	0.749953	1.2838		0.775546	0	1	1	no
ENSORLG00000000548	ENSORLG00000000548	zgc:56235	chr12:1512323-1518771	medial	apical	NOTEST	0.443327	0		#NAME?	0	1	1	no
ENSORLG00000000553	ENSORLG00000000553	kcng4b	chr3:5618045-5622949	medial	apical	NOTEST	0.140237	0.373307		1.41249	0	1	1	no
ENSORLG00000000554	ENSORLG00000000554	COPS6	chr10:6640308-6656736	medial	apical	NOTEST	0	0		0	0	1	1	no
ENSORLG00000000555	ENSORLG00000000555	inpp5e	chr9:2062536-2076858	medial	apical	OK	11.1793	10.2704		-0.122339	-0.351545	0.5483	0.873594	no
ENSORLG00000000556	ENSORLG00000000556	valop	chr15:2208055-2240355	medial	apical	OK	7.18004	5.35379		-0.423431	-0.570711	0.33555	0.760857	no
ENSORLG00000000557	ENSORLG00000000557	-	chr2:6936466-7672707	medial	apical	NOTEST	1.08077	1.48246		0.455934	0	1	1	no
ENSORLG00000000558	ENSORLG00000000558	zmp:0000001073	chr13:1726474-1797163	medial	apical	OK	8.67221	8.25484		-0.0711586	-0.147065	0.79315	0.955563	no
ENSORLG00000000559	ENSORLG00000000559	TNNI2	chr6:6328067-6353968	medial	apical	NOTEST	0	0		0	0	1	1	no
ENSORLG00000000560	ENSORLG00000000560	-	chr9:2079936-2080747	medial	apical	NOTEST	0.549255	1.95389		1.8308	0	1	1	no
ENSORLG00000000564	ENSORLG00000000564	SLC25A1	chr12:1522031-1533771	medial	apical	OK	15.0556	20.3709		0.436205	0.861074	0.1372	0.535062	no
ENSORLG00000000565	ENSORLG00000000565	rpl12	chr3:5680505-5683450	medial	apical	NOTEST	0	0		0	0	1	1	no
ENSORLG00000000568	ENSORLG00000000568	-	chr11:1225396-1240862	medial	apical	NOTEST	0.664342	0.976924		0.55632	0	1	1	no
ENSORLG00000000569	ENSORLG00000000569	kita	chr4:419365-452679	medial	apical	OK	16.2523	14.6086		-0.153826	-0.47029	0.4098	0.809611	no
ENSORLG00000000574	ENSORLG00000000574	-	chr6:9065701-9087973	medial	apical	NOTEST	0.491115	0.847757		0.787589	0	1	1	no
ENSORLG00000000575	ENSORLG00000000575	-	chr13:2308157-2313962	medial	apical	OK	22.6244	21.9858		-0.0413041	-0.0500899	0.9319	0.982228	no
ENSORLG00000000576	ENSORLG00000000576	-	chr3:5686596-5688600	medial	apical	NOTEST	0	0		0	0	1	1	no
ENSORLG00000000577	ENSORLG00000000577	usp25	chr14:2548042-2573074	medial	apical	OK	30.9897	32.3386		0.0614668	0.19871	0.73345	0.941938	no
ENSORLG00000000578	ENSORLG00000000578	aurkb	chr10:6640308-6656736	medial	apical	NOTEST	0	0		0	0	1	1	no
ENSORLG00000000580	ENSORLG00000000580	si:zfos-464b6.2 (1 of many)	chr13:2349356-2369161	medial	apical	NOTEST	0.192796	0.0336377		-2.51893	0	1	1	no
ENSORLG00000000583	ENSORLG00000000583	pbrm1	chr5:2538232-2549646	medial	apical	NOTEST	0	0		0	0	1	1	no
ENSORLG00000000586	ENSORLG00000000586	nrip1b	chr14:2657352-2660910	medial	apical	NOTEST	1.58216	2.12201		0.423535	0	1	1	no
ENSORLG00000000588	ENSORLG00000000588	-	chr10:6657495-6660207	medial	apical	NOTEST	0	0		0	0	1	1	no
ENSORLG00000000590	ENSORLG00000000590	-	chr11:1242167-1275843	medial	apical	NOTEST	0.177008	0.358252		1.01716	0	1	1	no
ENSORLG00000000591	ENSORLG00000000591	TNNI2 (1 of many)	chr6:6328067-6353968	medial	apical	NOTEST	0	0		0	0	1	1	no
ENSORLG00000000592	ENSORLG00000000592	kdr	chr4:257444-324142	medial	apical	OK	12.9556	11.0066		-0.235212	-0.638036	0.26055	0.689664	no
ENSORLG00000000594	ENSORLG00000000594	-	chr11:1242167-1275843	medial	apical	NOTEST	0	0		0	0	1	1	no
ENSORLG00000000595	ENSORLG00000000595	-	chr2:9823214-9840881	medial	apical	NOTEST	0	0		0	0	1	1	no
ENSORLG00000000599	ENSORLG00000000599	lsp1	chr6:6366315-6411999	medial	apical	NOTEST	0.325119	0.346128		0.0903355	0	1	1	no
ENSORLG00000000600	ENSORLG00000000600	kmt5b	chr3:5699216-5706186	medial	apical	NOTEST	0.0421098	0.184725		2.13315	0	1	1	no
ENSORLG00000000601	ENSORLG00000000601	-	chr15:2436932-2488842	medial	apical	NOTEST	0.713023	0.455239		-0.647324	0	1	1	no
ENSORLG00000000602	ENSORLG00000000602	zgc:171927	chr13:2440156-2444173	medial	apical	NOTEST	0.121496	0.148966		0.294073	0	1	1	no
ENSORLG00000000603	ENSORLG00000000603	cse1l	chr5:2550007-2575693	medial	apical	NOTEST	0	0		0	0	1	1	no
ENSORLG00000000605	ENSORLG00000000605	-	chr2:9856876-9864364	medial	apical	NOTEST	0	0		0	0	1	1	no
ENSORLG00000000606	ENSORLG00000000606	RAB28	chr10:6680425-6724346	medial	apical	NOTEST	0	0		0	0	1	1	no
ENSORLG00000000607	ENSORLG00000000607	rps3	chr13:2444796-2458480	medial	apical	OK	14.1709	20.5872		0.538818	0.910077	0.1171	0.505299	no
ENSORLG00000000608	ENSORLG00000000608	srd5a3	chr4:163463-166968	medial	apical	OK	4.57229	4.84057		0.0822575	0.142972	0.8094	0.957626	no
ENSORLG00000000610	ENSORLG00000000610	-	chr2:9867261-9895765	medial	apical	NOTEST	0	0		0	0	1	1	no
ENSORLG00000000611	ENSORLG00000000611	ash1l	chr11:1276758-1308334	medial	apical	NOTEST	0.0589501	0.12787		1.11711	0	1	1	no
ENSORLG00000000613	ENSORLG00000000613	ptpn11b	chr7:1474643-1513302	medial	apical	NOTEST	0	0.209202		inf	0	1	1	no
ENSORLG00000000614	ENSORLG00000000614	tmem165	chr4:148963-156523	medial	apical	OK	6.69045	4.56701		-0.550853	-0.946537	0.1039	0.481461	no
ENSORLG00000000615	ENSORLG00000000615	ccnb2	chr3:5710208-5712592	medial	apical	NOTEST	0	0		0	0	1	1	no
ENSORLG00000000616	ENSORLG00000000616	-	chr2:9867261-9895765	medial	apical	NOTEST	0	0		0	0	1	1	no
ENSORLG00000000619	ENSORLG00000000619	-	chr5:2550007-2575693	medial	apical	NOTEST	0	0		0	0	1	1	no
ENSORLG00000000620	ENSORLG00000000620	ADGRA1	chr15:2591285-2755312	medial	apical	NOTEST	0.0104231	0.0578233		2.47187	0	1	1	no
ENSORLG00000000621	ENSORLG00000000621	KCNB1	chr5:2582981-2651067	medial	apical	NOTEST	0	0		0	0	1	1	no
ENSORLG00000000622	ENSORLG00000000622	sumo1	chr2:9898759-9902638	medial	apical	NOTEST	0	0		0	0	1	1	no
ENSORLG00000000623	ENSORLG00000000623	gdpd5a	chr14:2691689-2724771	medial	apical	NOTEST	0.727381	0.585713		-0.312519	0	1	1	no
ENSORLG00000000624	ENSORLG00000000624	gsr	chr10:7151405-7163383	medial	apical	NOTEST	0.0814443	0.206741		1.34394	0	1	1	no
ENSORLG00000000625	ENSORLG00000000625	scamp3	chr11:1311726-1318164	medial	apical	OK	0.469403	6.3954	6.8648	3.76813	3.85703	0.0001	0.0040255	yes
ENSORLG00000000626	ENSORLG00000000626	-	chr3:5719356-5741879	medial	apical	NOTEST	0	0		0	0	1	1	no
ENSORLG00000000628	ENSORLG00000000628	dennd2c	chr7:1517414-1537307	medial	apical	NOTEST	0.764248	1.48847		0.961719	0	1	1	no
ENSORLG00000000631	ENSORLG00000000631	-	chr11:1951277-1952713	medial	apical	NOTEST	0	0		0	0	1	1	no
ENSORLG00000000633	ENSORLG00000000633	vox	chr15:2815054-2816174	medial	apical	NOTEST	0	1.44288		inf	0	1	1	no
ENSORLG00000000634	ENSORLG00000000634	exoc1	chr4:40691-108745	medial	apical	NOTEST	0.645604	1.06542		0.722695	0	1	1	no
ENSORLG00000000636	ENSORLG00000000636	notch1b	chr9:2117853-2169693	medial	apical	NOTEST	0.15252	0.0672091		-1.18227	0	1	1	no
ENSORLG00000000638	ENSORLG00000000638	ndufb9	chr11:1954706-1972342	medial	apical	NOTEST	0	0		0	0	1	1	no
ENSORLG00000000639	ENSORLG00000000639	-	chr1:2896627-2904758	medial	apical	NOTEST	0	0		0	0	1	1	no
ENSORLG00000000640	ENSORLG00000000640	ints4	chr13:2462453-2471960	medial	apical	OK	7.07042	9.13451		0.36953	0.803987	0.1499	0.557063	no
ENSORLG00000000642	ENSORLG00000000642	rasl12	chr3:5758020-5763186	medial	apical	NOTEST	0	0		0	0	1	1	no
ENSORLG00000000644	ENSORLG00000000644	dntt	chr15:2957360-3135061	medial	apical	NOTEST	2.78217	1.96844		-0.499157	0	1	1	no
ENSORLG00000000645	ENSORLG00000000645	kbtbd13	chr3:5764775-5768750	medial	apical	NOTEST	0	0		0	0	1	1	no
ENSORLG00000000647	ENSORLG00000000647	tmem65	chr11:1973495-1991025	medial	apical	NOTEST	1.6363	0.513032		-1.67331	0	1	1	no
ENSORLG00000000648	ENSORLG00000000648	map3k2	chr2:9902790-9913462	medial	apical	NOTEST	0	0		0	0	1	1	no
ENSORLG00000000650	ENSORLG00000000650	slc30a9	chr10:7164258-7179277	medial	apical	NOTEST	0.513042	0.528338		0.0423853	0	1	1	no
ENSORLG00000000651	ENSORLG00000000651	aamdc	chr13:2472243-2472741	medial	apical	NOTEST	0	1.02114		inf	0	1	1	no
ENSORLG00000000652	ENSORLG00000000652	marveld2a	chr12:1574997-1585647	medial	apical	NOTEST	0.0732583	0.375076		2.35612	0	1	1	no
ENSORLG00000000653	ENSORLG00000000653	PTGIS	chr5:2582981-2651067	medial	apical	NOTEST	0	0		0	0	1	1	no
ENSORLG00000000654	ENSORLG00000000654	si:dkey-109l4.6	chr10:7181746-7188921	medial	apical	OK	85.5291	74.9175		-0.191113	-0.605476	0.2869	0.71971	no
ENSORLG00000000655	ENSORLG00000000655	ampd1	chr7:1544610-1557693	medial	apical	NOTEST	1.98876	2.82609		0.506937	0	1	1	no
ENSORLG00000000656	ENSORLG00000000656	pdcd7	chr3:5777327-5783532	medial	apical	NOTEST	0.134119	0		#NAME?	0	1	1	no
ENSORLG00000000659	ENSORLG00000000659	cep135	chr4:40691-108745	medial	apical	OK	12.8377	14.7115		0.19655	0.583546	0.31255	0.743804	no
ENSORLG00000000661	ENSORLG00000000661	BLNK	chr15:3140513-3168841	medial	apical	NOTEST	0.557663	2.15007		1.94692	0	1	1	no
ENSORLG00000000662	ENSORLG00000000662	-	chr11:1997279-2045548	medial	apical	NOTEST	0.147865	0		#NAME?	0	1	1	no
ENSORLG00000000664	ENSORLG00000000664	cygb	chr1:2948077-2975283	medial	apical	NOTEST	1.5936	2.56044		0.684103	0	1	1	no
ENSORLG00000000665	ENSORLG00000000665	-	chr15:3170446-3174190	medial	apical	OK	4.05124	8.98475	13.036	1.14912	2.50398	5e-05	0.00225489	yes
ENSORLG00000000668	ENSORLG00000000668	oclna	chr12:1587811-1596256	medial	apical	NOTEST	0	0		0	0	1	1	no
ENSORLG00000000669	ENSORLG00000000669	dscama	chr14:2725810-2814030	medial	apical	OK	5.17612	6.12635		0.243158	0.661982	0.2503	0.679457	no
ENSORLG00000000671	ENSORLG00000000671	chst14	chr4:25845-40671	medial	apical	NOTEST	0.475683	0.138542		-1.77968	0	1	1	no
ENSORLG00000000672	ENSORLG00000000672	ubac1	chr9:2170022-2179185	medial	apical	NOTEST	0.121776	0.119433		-0.0280266	0	1	1	no
ENSORLG00000000674	ENSORLG00000000674	ccnj	chr15:3181411-3186195	medial	apical	NOTEST	0.16289	0.289113		0.827733	0	1	1	no
ENSORLG00000000675	ENSORLG00000000675	ankrd34ba	chr12:1599367-1600900	medial	apical	OK	12.2686	11.4297		-0.102182	-0.21265	0.7061	0.931835	no
ENSORLG00000000676	ENSORLG00000000676	thumpd3	chr5:2651170-2668885	medial	apical	NOTEST	0	0		0	0	1	1	no
ENSORLG00000000677	ENSORLG00000000677	-	chr10:7338343-7349844	medial	apical	OK	614.029	783.18		0.351036	1.23953	0.0292	0.245296	no
ENSORLG00000000678	ENSORLG00000000678	tnnt3a	chr6:6416910-6425247	medial	apical	NOTEST	0.1962	0		#NAME?	0	1	1	no
ENSORLG00000000679	ENSORLG00000000679	ech1	chr13:2473829-2508613	medial	apical	OK	75.5619	87.0654		0.20444	0.547731	0.34245	0.763574	no
ENSORLG00000000680	ENSORLG00000000680	-	chr14:2838264-2839584	medial	apical	NOTEST	0.451381	0.928407		1.04041	0	1	1	no
ENSORLG00000000681	ENSORLG00000000681	si:ch211-113j14.1	chr2:9922088-9934782	medial	apical	NOTEST	0	0		0	0	1	1	no
ENSORLG00000000682	ENSORLG00000000682	SPHK1	chr1:3015530-3043493	medial	apical	NOTEST	0.106021	0		#NAME?	0	1	1	no
ENSORLG00000000683	ENSORLG00000000683	camsap1b	chr9:2179201-2204004	medial	apical	NOTEST	0.280293	0.0600687		-2.22225	0	1	1	no
ENSORLG00000000685	ENSORLG00000000685	midn	chr4:1991572-2017421	medial	apical	OK	4.38012	3.80681		-0.202388	-0.46961	0.40905	0.809611	no
ENSORLG00000000686	ENSORLG00000000686	-	chr14:15235537-15271444	medial	apical	NOTEST	0	0		0	0	1	1	no
ENSORLG00000000688	ENSORLG00000000688	tmem198b	chr2:9955226-9966440	medial	apical	NOTEST	0	0		0	0	1	1	no
ENSORLG00000000692	ENSORLG00000000692	sfxn5b	chr10:7354254-7368159	medial	apical	OK	31.5755	41.8592		0.406742	0.962783	0.0946	0.457589	no
ENSORLG00000000693	ENSORLG00000000693	-	chr14:2847577-2880333	medial	apical	NOTEST	0.502184	0		#NAME?	0	1	1	no
ENSORLG00000000694	ENSORLG00000000694	myod1	chr6:6431554-6435912	medial	apical	OK	19.7478	16.8525		-0.228731	-0.384721	0.4906	0.853863	no
ENSORLG00000000696	ENSORLG00000000696	-	chr4:14092313-14184015	medial	apical	NOTEST	0.0420064	0		#NAME?	0	1	1	no
ENSORLG00000000697	ENSORLG00000000697	si:dkey-23a13.21	chr14:21232462-21233086	medial	apical	NOTEST	3.64208	2.27379		-0.679662	0	1	1	no
ENSORLG00000000698	ENSORLG00000000698	-	chr11:2051125-2091887	medial	apical	OK	79.2566	74.5425		-0.0884682	-0.273414	0.6281	0.913071	no
ENSORLG00000000700	ENSORLG00000000700	btaf1	chr15:3195225-3215208	medial	apical	OK	5.72919	10.9732	16.7024	0.937589	2.45332	5e-05	0.00225489	yes
ENSORLG00000000702	ENSORLG00000000702	srgap3	chr5:2672378-2743880	medial	apical	NOTEST	0.897989	0.652599		-0.460501	0	1	1	no
ENSORLG00000000703	ENSORLG00000000703	cilp2	chr4:2139222-2161720	medial	apical	NOTEST	1.21414	2.5775		1.08604	0	1	1	no
ENSORLG00000000704	ENSORLG00000000704	adra1ba	chr14:2884369-2929100	medial	apical	OK	328.684	350.443		0.0924772	0.326203	0.57225	0.887143	no
ENSORLG00000000705	ENSORLG00000000705	opga	chr11:2108802-2115407	medial	apical	NOTEST	0.511312	0.486672		-0.0712547	0	1	1	no
ENSORLG00000000706	ENSORLG00000000706	desmb	chr2:9970352-9980321	medial	apical	NOTEST	0	0		0	0	1	1	no
ENSORLG00000000707	ENSORLG00000000707	csde1	chr7:1560390-1581525	medial	apical	NOTEST	1.21836	1.85974		0.610157	0	1	1	no
ENSORLG00000000708	ENSORLG00000000708	-	chr3:5901708-5922165	medial	apical	NOTEST	0.664278	0.906398		0.448358	0	1	1	no
ENSORLG00000000709	ENSORLG00000000709	med17	chr13:2473829-2508613	medial	apical	NOTEST	0.286542	0.175057		-0.710925	0	1	1	no
ENSORLG00000000713	ENSORLG00000000713	smyd5	chr10:7368407-7377678	medial	apical	NOTEST	0.187151	0.131823		-0.5056	0	1	1	no
ENSORLG00000000715	ENSORLG00000000715	-	chr13:2473829-2508613	medial	apical	NOTEST	0.431691	0.300639		-0.521964	0	1	1	no
ENSORLG00000000718	ENSORLG00000000718	UBE2O	chr1:3048073-3114005	medial	apical	OK	8.60374	7.33799		-0.22958	-0.509889	0.3754	0.786493	no
ENSORLG00000000719	ENSORLG00000000719	oxtr	chr5:2864249-2872801	medial	apical	NOTEST	0.475488	0.527948		0.150989	0	1	1	no
ENSORLG00000000720	ENSORLG00000000720	gatad2ab	chr4:2194055-2221831	medial	apical	OK	193.633	227.266		0.231057	0.804821	0.15875	0.56691	no
ENSORLG00000000721	ENSORLG00000000721	-	chr6:6536499-6582023	medial	apical	OK	21.0206	24.1659		0.201171	0.266328	0.6305	0.914136	no
ENSORLG00000000723	ENSORLG00000000723	SLC4A11	chr10:7518961-7532644	medial	apical	OK	34.4532	31.7842		-0.116328	-0.357551	0.52465	0.865884	no
ENSORLG00000000724	ENSORLG00000000724	hnrnpl	chr13:2640824-2657269	medial	apical	NOTEST	0	0		0	0	1	1	no
ENSORLG00000000725	ENSORLG00000000725	aanat	chr1:3048073-3114005	medial	apical	OK	4.20668	3.02377		-0.476333	-0.262375	0.656	0.92018	no
ENSORLG00000000726	ENSORLG00000000726	cpeb3	chr15:3225024-3259910	medial	apical	NOTEST	2.44338	2.05115		-0.252446	0	1	1	no
ENSORLG00000000727	ENSORLG00000000727	mpped2a	chr3:6001371-6059645	medial	apical	NOTEST	0.252973	0		#NAME?	0	1	1	no
ENSORLG00000000729	ENSORLG00000000729	cav3	chr5:2879930-2882125	medial	apical	OK	24.3187	23.451		-0.0524136	-0.0952818	0.86705	0.969742	no
ENSORLG00000000733	ENSORLG00000000733	si:dkey-21e5.1	chr9:2211923-2274660	medial	apical	NOTEST	0.0334294	0		#NAME?	0	1	1	no
ENSORLG00000000737	ENSORLG00000000737	rfwd3	chr6:6601060-6612514	medial	apical	NOTEST	0.14786	0.409566		1.46986	0	1	1	no
ENSORLG00000000740	ENSORLG00000000740	march5	chr15:3262237-3364230	medial	apical	NOTEST	0.562636	0.366678		-0.617689	0	1	1	no
ENSORLG00000000741	ENSORLG00000000741	-	chr9:2312444-2317657	medial	apical	NOTEST	0.102178	0.162345		0.667981	0	1	1	no
ENSORLG00000000742	ENSORLG00000000742	im:6912630	chr7:1583850-1585512	medial	apical	NOTEST	0.241051	0.531634		1.14109	0	1	1	no
ENSORLG00000000744	ENSORLG00000000744	-	chr11:2128019-2158912	medial	apical	OK	4.23481	5.0645		0.25812	0.501622	0.38225	0.791144	no
ENSORLG00000000746	ENSORLG00000000746	srsf7a	chr13:2657854-2662029	medial	apical	NOTEST	0	0		0	0	1	1	no
ENSORLG00000000747	ENSORLG00000000747	enox2	chr10:7970175-8178996	medial	apical	OK	21.5662	31.1236		0.529234	1.33245	0.01885	0.185045	no
ENSORLG00000000748	ENSORLG00000000748	-	chr2:10085428-10087326	medial	apical	NOTEST	0	0		0	0	1	1	no
ENSORLG00000000751	ENSORLG00000000751	IDE (1 of many)	chr15:3262237-3364230	medial	apical	NOTEST	0.702869	0.321133		-1.13008	0	1	1	no
ENSORLG00000000752	ENSORLG00000000752	parp3	chr5:2891233-2902227	medial	apical	OK	8.71057	8.4045		-0.0516057	-0.141871	0.8054	0.957209	no
ENSORLG00000000753	ENSORLG00000000753	rasgrf2a	chr12:1651328-1686057	medial	apical	OK	28.8517	30.481		0.0792516	0.241871	0.6741	0.925445	no
ENSORLG00000000754	ENSORLG00000000754	RHBDF2	chr1:3048073-3114005	medial	apical	NOTEST	2.13086	1.98974		-0.0988576	0	1	1	no
ENSORLG00000000756	ENSORLG00000000756	slc8a2b	chr13:2668371-2740257	medial	apical	NOTEST	0.502127	0.564248		0.168275	0	1	1	no
ENSORLG00000000757	ENSORLG00000000757	tmco4	chr7:1592474-1613990	medial	apical	NOTEST	9.30208e-06	0		#NAME?	0	1	1	no
ENSORLG00000000758	ENSORLG00000000758	hspb11	chr14:3336005-3338295	medial	apical	NOTEST	0	0		0	0	1	1	no
ENSORLG00000000760	ENSORLG00000000760	mau2	chr4:2221975-2237792	medial	apical	NOTEST	0.219895	0.487258		1.14788	0	1	1	no
ENSORLG00000000761	ENSORLG00000000761	vwa1	chr7:1624179-1633452	medial	apical	NOTEST	0.749581	1.77942		1.24725	0	1	1	no
ENSORLG00000000762	ENSORLG00000000762	-	chr14:3345502-3354917	medial	apical	NOTEST	0.0580957	0		#NAME?	0	1	1	no
ENSORLG00000000763	ENSORLG00000000763	grm2a	chr5:2908348-2958289	medial	apical	NOTEST	0.128128	0		#NAME?	0	1	1	no
ENSORLG00000000765	ENSORLG00000000765	zdhhc13	chr3:6141056-6154678	medial	apical	NOTEST	0.0480297	0.0807171		0.748947	0	1	1	no
ENSORLG00000000766	ENSORLG00000000766	-	chr14:3360562-3362564	medial	apical	NOTEST	0	0		0	0	1	1	no
ENSORLG00000000767	ENSORLG00000000767	glg1a	chr6:6618128-6656309	medial	apical	OK	26.5738	22.9063		-0.214265	-0.682359	0.22845	0.657191	no
ENSORLG00000000768	ENSORLG00000000768	tex264	chr5:2964904-3055555	medial	apical	NOTEST	0.782809	0.951258		0.281176	0	1	1	no
ENSORLG00000000769	ENSORLG00000000769	ckmt2a	chr12:1692343-1698478	medial	apical	OK	43.5804	47.3148		0.118612	0.304129	0.59605	0.89872	no
ENSORLG00000000770	ENSORLG00000000770	SLC25A42 (1 of many)	chr4:2237854-2246961	medial	apical	NOTEST	0.338114	0.404561		0.25885	0	1	1	no
ENSORLG00000000771	ENSORLG00000000771	-	chr12:1700087-1701355	medial	apical	OK	32.1394	28.5467		-0.171018	-0.280423	0.62745	0.912717	no
ENSORLG00000000772	ENSORLG00000000772	-	chr14:3392057-3400110	medial	apical	NOTEST	0.298556	0.046385		-2.68627	0	1	1	no
ENSORLG00000000773	ENSORLG00000000773	-	chr6:6662212-6670046	medial	apical	OK	19.9681	22.2969		0.159143	0.466774	0.41765	0.812805	no
ENSORLG00000000774	ENSORLG00000000774	ide	chr15:3262237-3364230	medial	apical	NOTEST	1.36602	0.721614		-0.920677	0	1	1	no
ENSORLG00000000775	ENSORLG00000000775	MYH11 (1 of many)	chr8:1039681-1055033	medial	apical	NOTEST	0	0		0	0	1	1	no
ENSORLG00000000776	ENSORLG00000000776	csrp3	chr3:6158205-6162881	medial	apical	NOTEST	0.186177	0		#NAME?	0	1	1	no
ENSORLG00000000778	ENSORLG00000000778	-	chr12:1725420-1730803	medial	apical	OK	6.04988	6.64741		0.135885	0.186293	0.7342	0.942369	no
ENSORLG00000000780	ENSORLG00000000780	ralgapb	chr7:1635200-1657596	medial	apical	NOTEST	2.8998	2.90769		0.0039226	0	1	1	no
ENSORLG00000000781	ENSORLG00000000781	si:ch211-221f10.2	chr10:8200606-8240728	medial	apical	OK	7.79878	9.38913		0.267743	0.785892	0.1665	0.57346	no
ENSORLG00000000782	ENSORLG00000000782	-	chr14:3402955-3421106	medial	apical	NOTEST	0	0		0	0	1	1	no
ENSORLG00000000785	ENSORLG00000000785	acox1	chr1:3116332-3168542	medial	apical	NOTEST	0.501827	0.94111		0.907174	0	1	1	no
ENSORLG00000000786	ENSORLG00000000786	e2f8	chr3:6167980-6174851	medial	apical	NOTEST	0.0369582	0.0954897		1.36945	0	1	1	no
ENSORLG00000000787	ENSORLG00000000787	si:ch1073-174d20.2	chr6:6703835-6729436	medial	apical	NOTEST	0.293464	0.362145		0.303384	0	1	1	no
ENSORLG00000000788	ENSORLG00000000788	-	chr14:3402955-3421106	medial	apical	NOTEST	0	0		0	0	1	1	no
ENSORLG00000000790	ENSORLG00000000790	tmem161a	chr4:2292539-2320793	medial	apical	OK	21.242	9.19437	30.4364	-1.20809	-1.88172	0.0017	0.0374875	yes
ENSORLG00000000791	ENSORLG00000000791	zgc:101858	chr9:2410757-2416771	medial	apical	OK	35.6248	28.5146		-0.32118	-0.910341	0.11425	0.500564	no
ENSORLG00000000792	ENSORLG00000000792	ten1	chr1:3116332-3168542	medial	apical	NOTEST	0	0		0	0	1	1	no
ENSORLG00000000793	ENSORLG00000000793	NDE1 (1 of many)	chr8:1039681-1055033	medial	apical	NOTEST	0	0		0	0	1	1	no
ENSORLG00000000794	ENSORLG00000000794	med12	chr10:8242490-8280334	medial	apical	OK	5.80483	5.6409		-0.0413282	-0.0993471	0.86625	0.969742	no
ENSORLG00000000795	ENSORLG00000000795	sec14l7	chr12:1732194-1740040	medial	apical	NOTEST	0	0		0	0	1	1	no
ENSORLG00000000796	ENSORLG00000000796	rfxank	chr4:2347000-2362130	medial	apical	NOTEST	1.47417	2.17285		0.559687	0	1	1	no
ENSORLG00000000797	ENSORLG00000000797	si:dkeyp-72e1.7	chr8:1059282-1062804	medial	apical	NOTEST	0.146125	0		#NAME?	0	1	1	no
ENSORLG00000000798	ENSORLG00000000798	-	chr9:2416791-2419462	medial	apical	NOTEST	1.5214	3.26148		1.10012	0	1	1	no
ENSORLG00000000799	ENSORLG00000000799	mars2	chr10:8242490-8280334	medial	apical	NOTEST	0	0		0	0	1	1	no
ENSORLG00000000800	ENSORLG00000000800	nav2a	chr3:6231111-6422716	medial	apical	NOTEST	1.00663	1.09304		0.118815	0	1	1	no
ENSORLG00000000801	ENSORLG00000000801	nr2c2ap	chr4:2362671-2378971	medial	apical	OK	11.5947	11.2819		-0.0394531	-0.0253473	0.96255	0.987797	no
ENSORLG00000000802	ENSORLG00000000802	-	chr11:2162560-2183178	medial	apical	OK	19.4427	21.0078		0.1117	0.335585	0.56005	0.880058	no
ENSORLG00000000803	ENSORLG00000000803	cnnm4a	chr12:1750142-1768973	medial	apical	NOTEST	0	0		0	0	1	1	no
ENSORLG00000000804	ENSORLG00000000804	znf277	chr6:6703835-6729436	medial	apical	NOTEST	0.0138232	0.0214903		0.636597	0	1	1	no
ENSORLG00000000805	ENSORLG00000000805	lrrc8ab	chr9:2419637-2426988	medial	apical	OK	13.1319	13.5246		0.0425128	0.12392	0.8255	0.960005	no
ENSORLG00000000806	ENSORLG00000000806	prex1	chr7:1657709-1727967	medial	apical	OK	42.5595	41.6609		-0.0307857	-0.099179	0.8658	0.969742	no
ENSORLG00000000808	ENSORLG00000000808	crlf3	chr8:1065715-1072070	medial	apical	NOTEST	0.0391616	0.0882366		1.17194	0	1	1	no
ENSORLG00000000809	ENSORLG00000000809	neu3b	chr12:1777672-1778921	medial	apical	NOTEST	0	0		0	0	1	1	no
ENSORLG00000000811	ENSORLG00000000811	immp2l	chr6:6731546-6739006	medial	apical	NOTEST	0	0.465475		inf	0	1	1	no
ENSORLG00000000812	ENSORLG00000000812	zgc:101583	chr10:8301189-8313307	medial	apical	OK	28.7568	29.5458		0.0390532	0.0877234	0.87585	0.971224	no
ENSORLG00000000813	ENSORLG00000000813	fancd2	chr5:3056863-3077988	medial	apical	OK	26.2905	26.9001		0.033071	0.103453	0.85705	0.968002	no
ENSORLG00000000814	ENSORLG00000000814	kmo	chr15:3367953-3408125	medial	apical	NOTEST	1.01371	0.404834		-1.32425	0	1	1	no
ENSORLG00000000815	ENSORLG00000000815	evpla	chr1:3116332-3168542	medial	apical	OK	137.967	174.162		0.336111	1.18779	0.03885	0.282152	no
ENSORLG00000000816	ENSORLG00000000816	si:ch211-207k7.4	chr9:2427498-2441619	medial	apical	OK	15.266	15.3947		0.012113	0.0340116	0.9527	0.986243	no
ENSORLG00000000817	ENSORLG00000000817	pdcd2l	chr6:6739144-6741538	medial	apical	NOTEST	0.0623003	0		#NAME?	0	1	1	no
ENSORLG00000000822	ENSORLG00000000822	-	chr1:3265481-3271259	medial	apical	NOTEST	1.76542	1.25696		-0.490076	0	1	1	no
ENSORLG00000000823	ENSORLG00000000823	-	chr5:3077993-3092260	medial	apical	NOTEST	1.48216	1.78139		0.265301	0	1	1	no
ENSORLG00000000824	ENSORLG00000000824	larp1	chr14:3431696-3494968	medial	apical	NOTEST	0	0		0	0	1	1	no
ENSORLG00000000825	ENSORLG00000000825	-	chr1:3211219-3213643	medial	apical	NOTEST	0.284954	0.443006		0.636597	0	1	1	no
ENSORLG00000000826	ENSORLG00000000826	CNNM3	chr12:1784001-1797081	medial	apical	NOTEST	0	0.0539064		inf	0	1	1	no
ENSORLG00000000827	ENSORLG00000000827	opn3	chr15:3367953-3408125	medial	apical	NOTEST	0.222884	0.0326687		-2.77031	0	1	1	no
ENSORLG00000000829	ENSORLG00000000829	prmt3	chr3:6488651-6575248	medial	apical	NOTEST	0.0138266	0		#NAME?	0	1	1	no
ENSORLG00000000830	ENSORLG00000000830	prodhb	chr9:2865386-2888143	medial	apical	NOTEST	0.683388	0.654459		-0.0624011	0	1	1	no
ENSORLG00000000833	ENSORLG00000000833	dus2	chr6:6763838-6779172	medial	apical	NOTEST	0.113928	0.139584		0.293015	0	1	1	no
ENSORLG00000000835	ENSORLG00000000835	cdc42ep3	chr15:3510315-3511341	medial	apical	NOTEST	0	0		0	0	1	1	no
ENSORLG00000000836	ENSORLG00000000836	ncanb	chr4:2418402-2528342	medial	apical	OK	28.5637	32.4448		0.183805	0.599166	0.2992	0.733225	no
ENSORLG00000000837	ENSORLG00000000837	PURB	chr12:1824651-1825737	medial	apical	NOTEST	0	0		0	0	1	1	no
ENSORLG00000000838	ENSORLG00000000838	faxdc2	chr14:3431696-3494968	medial	apical	NOTEST	0	0		0	0	1	1	no
ENSORLG00000000839	ENSORLG00000000839	suz12a	chr8:1076149-1083934	medial	apical	NOTEST	0	0		0	0	1	1	no
ENSORLG00000000840	ENSORLG00000000840	polm	chr12:1834156-1841983	medial	apical	NOTEST	0	0		0	0	1	1	no
ENSORLG00000000842	ENSORLG00000000842	btk	chr10:8313613-8333085	medial	apical	NOTEST	1.03047	1.34188		0.380961	0	1	1	no
ENSORLG00000000843	ENSORLG00000000843	SCARF2	chr9:2891614-2913536	medial	apical	OK	8.30423	9.3951		0.178062	0.409583	0.4725	0.841532	no
ENSORLG00000000846	ENSORLG00000000846	hapln4	chr4:2537310-2560874	medial	apical	NOTEST	0.0392476	0		#NAME?	0	1	1	no
ENSORLG00000000847	ENSORLG00000000847	-	chr6:6791262-6819440	medial	apical	NOTEST	0	0.213912		inf	0	1	1	no
ENSORLG00000000848	ENSORLG00000000848	zgc:112294	chr9:2937156-2940816	medial	apical	OK	15.9719	10.4543		-0.61144	-0.893507	0.111	0.495963	no
ENSORLG00000000849	ENSORLG00000000849	srp68	chr1:3281542-3290578	medial	apical	NOTEST	2.91126	2.71842		-0.0988758	0	1	1	no
ENSORLG00000000850	ENSORLG00000000850	h2afy	chr14:3500471-3515490	medial	apical	NOTEST	0	0		0	0	1	1	no
ENSORLG00000000851	ENSORLG00000000851	-	chr6:6841011-6851535	medial	apical	OK	4.10365	6.23055		0.602452	0.877925	0.12775	0.521891	no
ENSORLG00000000852	ENSORLG00000000852	tsen54	chr8:1090894-1099908	medial	apical	NOTEST	0.0242037	0		#NAME?	0	1	1	no
ENSORLG00000000853	ENSORLG00000000853	cyp1b1	chr15:3593039-3596355	medial	apical	NOTEST	0	0		0	0	1	1	no
ENSORLG00000000854	ENSORLG00000000854	kcnq2a	chr7:1729619-1759747	medial	apical	NOTEST	0.167932	0.465811		1.47187	0	1	1	no
ENSORLG00000000855	ENSORLG00000000855	-	chr9:2959566-2985982	medial	apical	NOTEST	0.783589	2.14008		1.44949	0	1	1	no
ENSORLG00000000857	ENSORLG00000000857	gnsb	chr12:1844207-1854187	medial	apical	OK	32.9282	35.3492		0.102352	0.251135	0.66635	0.923894	no
ENSORLG00000000859	ENSORLG00000000859	gla	chr10:8313613-8333085	medial	apical	OK	117.006	101.886		-0.199639	-0.691913	0.22325	0.651608	no
ENSORLG00000000860	ENSORLG00000000860	polg2	chr1:3290653-3307203	medial	apical	OK	7.39662	7.77865		0.0726543	0.0717045	0.9027	0.978934	no
ENSORLG00000000861	ENSORLG00000000861	nanp	chr15:3640354-3643318	medial	apical	OK	14.9623	14.933		-0.00282934	-0.00569003	0.98345	0.993722	no
ENSORLG00000000864	ENSORLG00000000864	slc2a13b	chr6:6898784-6913998	medial	apical	NOTEST	2.10346	1.39101		-0.596631	0	1	1	no
ENSORLG00000000865	ENSORLG00000000865	chrna4b	chr7:1788400-1801489	medial	apical	NOTEST	0	0		0	0	1	1	no
ENSORLG00000000866	ENSORLG00000000866	DDX5	chr1:3290653-3307203	medial	apical	OK	28.4285	21.6155		-0.39527	-0.801314	0.1645	0.57208	no
ENSORLG00000000867	ENSORLG00000000867	mrps24	chr12:1855668-1856626	medial	apical	OK	40.7606	31.4996		-0.371843	-0.682269	0.23835	0.668188	no
ENSORLG00000000868	ENSORLG00000000868	txndc15	chr14:3683039-3687071	medial	apical	NOTEST	0.365511	1.58611		2.11751	0	1	1	no
ENSORLG00000000869	ENSORLG00000000869	tmem104	chr8:1112759-1158637	medial	apical	NOTEST	0	0		0	0	1	1	no
ENSORLG00000000870	ENSORLG00000000870	-	chr1:1206778-1243811	medial	apical	NOTEST	1.53724	2.15829		0.48954	0	1	1	no
ENSORLG00000000871	ENSORLG00000000871	glra4a	chr10:8363784-8437039	medial	apical	NOTEST	0.830392	1.24125		0.579932	0	1	1	no
ENSORLG00000000875	ENSORLG00000000875	slc6a5	chr3:6576400-6605261	medial	apical	NOTEST	0.0347865	0		#NAME?	0	1	1	no
ENSORLG00000000878	ENSORLG00000000878	zgc:77058	chr14:3738404-3739034	medial	apical	NOTEST	0	0.769118		inf	0	1	1	no
ENSORLG00000000880	ENSORLG00000000880	zgpat	chr7:1807657-1815129	medial	apical	NOTEST	0	0		0	0	1	1	no
ENSORLG00000000882	ENSORLG00000000882	-	chr8:1211275-1253958	medial	apical	NOTEST	0.0493928	0.0304488		-0.697914	0	1	1	no
ENSORLG00000000883	ENSORLG00000000883	nudcd3	chr12:1858482-1862032	medial	apical	NOTEST	0.407738	0.606501		0.572868	0	1	1	no
ENSORLG00000000884	ENSORLG00000000884	-	chr1:8885005-8896486	medial	apical	NOTEST	0	0		0	0	1	1	no
ENSORLG00000000886	ENSORLG00000000886	pcdh19	chr10:9239278-9299282	medial	apical	NOTEST	0.0480431	0		#NAME?	0	1	1	no
ENSORLG00000000887	ENSORLG00000000887	tm6sf2	chr4:2575380-2600836	medial	apical	NOTEST	0.139965	0		#NAME?	0	1	1	no
ENSORLG00000000890	ENSORLG00000000890	polr1b	chr15:3645872-3652651	medial	apical	NOTEST	0.917661	1.0451		0.187614	0	1	1	no
ENSORLG00000000893	ENSORLG00000000893	-	chr3:7458082-7600065	medial	apical	NOTEST	0	0		0	0	1	1	no
ENSORLG00000000896	ENSORLG00000000896	COL14A1 (1 of many)	chr11:2206249-2324880	medial	apical	NOTEST	0.104767	0.182559		0.801183	0	1	1	no
ENSORLG00000000897	ENSORLG00000000897	nf2a	chr9:3039787-3082541	medial	apical	NOTEST	1.73364	0.304064		-2.51136	0	1	1	no
ENSORLG00000000898	ENSORLG00000000898	tti1	chr7:1815520-1826554	medial	apical	NOTEST	0	0		0	0	1	1	no
ENSORLG00000000900	ENSORLG00000000900	camk2b2	chr12:1863932-1897212	medial	apical	NOTEST	0	0		0	0	1	1	no
ENSORLG00000000902	ENSORLG00000000902	-	chr13:12490408-12498671	medial	apical	OK	13.5042	16.8865		0.322466	0.822388	0.14355	0.546675	no
ENSORLG00000000903	ENSORLG00000000903	ddx46	chr14:3740261-3753541	medial	apical	OK	21.3738	26.6411		0.31781	0.967646	0.09195	0.449483	no
ENSORLG00000000905	ENSORLG00000000905	rbfox3b	chr8:1293654-1669426	medial	apical	NOTEST	0.212262	0.161609		-0.393332	0	1	1	no
ENSORLG00000000906	ENSORLG00000000906	fbxw4	chr15:3653866-3704745	medial	apical	NOTEST	0.0654234	0.195795		1.58147	0	1	1	no
ENSORLG00000000909	ENSORLG00000000909	gtpbp2b	chr1:3326341-3338276	medial	apical	NOTEST	1.39704	1.00885		-0.46966	0	1	1	no
ENSORLG00000000912	ENSORLG00000000912	camlg	chr14:3754261-3760305	medial	apical	NOTEST	0.320413	0.566633		0.822484	0	1	1	no
ENSORLG00000000913	ENSORLG00000000913	si:ch73-63e15.2	chr4:2622486-2674181	medial	apical	NOTEST	0	0.0374449		inf	0	1	1	no
ENSORLG00000000914	ENSORLG00000000914	fbxo21	chr9:3083157-3092911	medial	apical	NOTEST	0.610505	0.204625		-1.57702	0	1	1	no
ENSORLG00000000916	ENSORLG00000000916	MAPK8IP1	chr3:7458082-7600065	medial	apical	NOTEST	0	0.0775963		inf	0	1	1	no
ENSORLG00000000917	ENSORLG00000000917	ENPP7	chr8:1867420-1874558	medial	apical	NOTEST	0.123454	0.0435178		-1.50429	0	1	1	no
ENSORLG00000000920	ENSORLG00000000920	sec24a	chr14:3760333-3780901	medial	apical	NOTEST	0.697306	0.666603		-0.0649641	0	1	1	no
ENSORLG00000000921	ENSORLG00000000921	kif21a	chr6:6916698-6991457	medial	apical	OK	20.4623	21.2405		0.0538528	0.177084	0.7538	0.947162	no
ENSORLG00000000922	ENSORLG00000000922	tesca	chr9:3094599-3121726	medial	apical	NOTEST	0	0.136321		inf	0	1	1	no
ENSORLG00000000923	ENSORLG00000000923	-	chr4:2680073-2685990	medial	apical	NOTEST	0.264541	0		#NAME?	0	1	1	no
ENSORLG00000000924	ENSORLG00000000924	slc2a15a	chr15:3746944-3777875	medial	apical	NOTEST	0.699323	0.588546		-0.248804	0	1	1	no
ENSORLG00000000925	ENSORLG00000000925	-	chr3:7607619-7609555	medial	apical	NOTEST	0.285335	0		#NAME?	0	1	1	no
ENSORLG00000000928	ENSORLG00000000928	fbxw8	chr9:3094599-3121726	medial	apical	NOTEST	0	0		0	0	1	1	no
ENSORLG00000000929	ENSORLG00000000929	nog1	chr8:1903093-1907513	medial	apical	NOTEST	0	0		0	0	1	1	no
ENSORLG00000000931	ENSORLG00000000931	ube2a	chr10:9697463-9706114	medial	apical	NOTEST	0.0232764	0.000437914		-5.73208	0	1	1	no
ENSORLG00000000932	ENSORLG00000000932	sar1b	chr14:3782726-3791432	medial	apical	OK	107.41	94.8911		-0.178789	-0.31412	0.588	0.894608	no
ENSORLG00000000933	ENSORLG00000000933	ctnnbl1	chr7:1877829-1928419	medial	apical	NOTEST	0	0		0	0	1	1	no
ENSORLG00000000935	ENSORLG00000000935	tlx1	chr15:3819141-3823539	medial	apical	NOTEST	0.056029	0.0435529		-0.363403	0	1	1	no
ENSORLG00000000937	ENSORLG00000000937	-	chr4:2694977-2762258	medial	apical	NOTEST	0.158132	0		#NAME?	0	1	1	no
ENSORLG00000000939	ENSORLG00000000939	-	chr13:2822432-2867944	medial	apical	NOTEST	0.589451	0.523455		-0.171308	0	1	1	no
ENSORLG00000000940	ENSORLG00000000940	jade2	chr14:3801785-3985500	medial	apical	OK	6.38819	8.01841		0.327908	0.826442	0.15675	0.564677	no
ENSORLG00000000943	ENSORLG00000000943	pctp	chr8:1943728-1965411	medial	apical	OK	3.89664	5.46633		0.488342	0.717198	0.2138	0.641424	no
ENSORLG00000000944	ENSORLG00000000944	rnft2	chr9:3124730-3141550	medial	apical	NOTEST	0	0		0	0	1	1	no
ENSORLG00000000945	ENSORLG00000000945	e2f1	chr7:1995059-2002037	medial	apical	NOTEST	0.0740415	0.105129		0.505754	0	1	1	no
ENSORLG00000000946	ENSORLG00000000946	CHST1	chr3:7845916-7847203	medial	apical	NOTEST	0	0		0	0	1	1	no
ENSORLG00000000947	ENSORLG00000000947	cdkn2aipnl	chr14:4018312-4019902	medial	apical	NOTEST	0	0		0	0	1	1	no
ENSORLG00000000949	ENSORLG00000000949	TMEM100	chr8:1943728-1965411	medial	apical	NOTEST	0	0.687912		inf	0	1	1	no
ENSORLG00000000951	ENSORLG00000000951	ube2b	chr14:4020022-4029193	medial	apical	NOTEST	0	0		0	0	1	1	no
ENSORLG00000000953	ENSORLG00000000953	zgc:110063	chr9:3124730-3141550	medial	apical	NOTEST	0	0		0	0	1	1	no
ENSORLG00000000954	ENSORLG00000000954	tp53bp2b	chr1:3338991-3369229	medial	apical	OK	11.2543	11.2358		-0.00237657	-0.00672009	0.9939	0.996392	no
ENSORLG00000000955	ENSORLG00000000955	cpne8	chr6:7010902-7131605	medial	apical	NOTEST	0.596408	0.700741		0.232582	0	1	1	no
ENSORLG00000000956	ENSORLG00000000956	znf341	chr7:2003547-2034420	medial	apical	NOTEST	0.0939004	0		#NAME?	0	1	1	no
ENSORLG00000000957	ENSORLG00000000957	PPP2CA	chr14:4040153-4118772	medial	apical	NOTEST	0	0		0	0	1	1	no
ENSORLG00000000961	ENSORLG00000000961	skp1	chr14:4040153-4118772	medial	apical	NOTEST	0	0		0	0	1	1	no
ENSORLG00000000962	ENSORLG00000000962	mmd	chr8:1968922-2033601	medial	apical	OK	3.71309	2.579		-0.525812	-0.522877	0.3423	0.763574	no
ENSORLG00000000963	ENSORLG00000000963	zgc:85932	chr13:2872647-2894815	medial	apical	NOTEST	1.54523	1.40516		-0.137091	0	1	1	no
ENSORLG00000000964	ENSORLG00000000964	slc1a2a	chr3:8151767-8158453	medial	apical	OK	5.44587	8.93808		0.714804	1.27478	0.03055	0.251012	no
ENSORLG00000000965	ENSORLG00000000965	cpa4	chr6:7154146-7158475	medial	apical	NOTEST	0.351152	0.522331		0.572868	0	1	1	no
ENSORLG00000000968	ENSORLG00000000968	-	chr11:2363332-2369635	medial	apical	NOTEST	0	0		0	0	1	1	no
ENSORLG00000000969	ENSORLG00000000969	hlfa	chr8:1968922-2033601	medial	apical	OK	10.047	9.34384		-0.10468	-0.144384	0.79225	0.955563	no
ENSORLG00000000970	ENSORLG00000000970	-	chr11:1840584-1851927	medial	apical	NOTEST	1.08675	1.61218		0.568999	0	1	1	no
ENSORLG00000000971	ENSORLG00000000971	-	chr11:1439647-1441080	medial	apical	NOTEST	0	0		0	0	1	1	no
ENSORLG00000000972	ENSORLG00000000972	-	chr1:3417903-3463407	medial	apical	OK	6.4763	9.34268		0.528667	0.726055	0.1537	0.560762	no
ENSORLG00000000973	ENSORLG00000000973	si:ch211-262e15.1	chr8:2038712-2052954	medial	apical	OK	47.4669	40.631		-0.224339	-0.723442	0.2075	0.63519	no
ENSORLG00000000976	ENSORLG00000000976	tcf7	chr14:4040153-4118772	medial	apical	NOTEST	0	0		0	0	1	1	no
ENSORLG00000000978	ENSORLG00000000978	CASTOR1	chr9:3152407-3184762	medial	apical	NOTEST	2.58922	1.90515		-0.442618	0	1	1	no
ENSORLG00000000979	ENSORLG00000000979	-	chr12:1903336-1922157	medial	apical	OK	4.54063	5.62612		0.309248	0.615104	0.2843	0.716288	no
ENSORLG00000000980	ENSORLG00000000980	eif3k	chr13:2896372-2899550	medial	apical	NOTEST	0.1421	0		#NAME?	0	1	1	no
ENSORLG00000000981	ENSORLG00000000981	slc22a7a	chr1:3486178-3505622	medial	apical	NOTEST	0.412138	0.438044		0.0879501	0	1	1	no
ENSORLG00000000982	ENSORLG00000000982	apip	chr3:8213889-8234065	medial	apical	OK	21.5783	9.15601	30.7343	-1.23679	-2.97832	5e-05	0.00225489	yes
ENSORLG00000000983	ENSORLG00000000983	-	chr11:2479893-2483315	medial	apical	NOTEST	1.69549	0.92474		-0.874584	0	1	1	no
ENSORLG00000000984	ENSORLG00000000984	tmem91	chr13:2938553-2940185	medial	apical	NOTEST	0.715548	0		#NAME?	0	1	1	no
ENSORLG00000000985	ENSORLG00000000985	slco2a1	chr4:2694977-2762258	medial	apical	NOTEST	0.0417389	0.023005		-0.859445	0	1	1	no
ENSORLG00000000987	ENSORLG00000000987	hells	chr15:3859533-3891524	medial	apical	NOTEST	1.31309	1.25695		-0.0630445	0	1	1	no
ENSORLG00000000988	ENSORLG00000000988	si:dkey-6l15.1	chr3:8419928-8421824	medial	apical	OK	4.15873	5.97338		0.522405	0.896378	0.1233	0.514679	no
ENSORLG00000000990	ENSORLG00000000990	ppp1r13l	chr13:2972940-2989820	medial	apical	OK	4.93957	6.90322		0.482883	1.104	0.0584	0.364878	no
ENSORLG00000000991	ENSORLG00000000991	vdac1	chr14:4159436-4173057	medial	apical	NOTEST	0	0		0	0	1	1	no
ENSORLG00000000992	ENSORLG00000000992	pargl	chr12:1925757-1934541	medial	apical	OK	36.3705	22.01		-0.724606	-1.75402	0.0027	0.0510871	no
ENSORLG00000000994	ENSORLG00000000994	usp4	chr5:3077993-3092260	medial	apical	NOTEST	1.84352	1.94434		0.0768221	0	1	1	no
ENSORLG00000000995	ENSORLG00000000995	calhm3	chr15:3901412-3904762	medial	apical	NOTEST	0.177619	0		#NAME?	0	1	1	no
ENSORLG00000000996	ENSORLG00000000996	opa3	chr13:3001333-3003166	medial	apical	NOTEST	1.53293	1.03559		-0.565848	0	1	1	no
ENSORLG00000000997	ENSORLG00000000997	sept6	chr10:9707607-9722658	medial	apical	OK	3.27588	6.46689	9.74277	0.98119	2.13572	0.00025	0.00823901	yes
ENSORLG00000001000	ENSORLG00000001000	nipsnap1	chr9:3185540-3197416	medial	apical	NOTEST	0.0312633	1.08899		5.12238	0	1	1	no
ENSORLG00000001001	ENSORLG00000001001	-	chr11:2611671-2646115	medial	apical	NOTEST	0	0		0	0	1	1	no
ENSORLG00000001002	ENSORLG00000001002	HNRNPUL1	chr13:3004388-3024850	medial	apical	NOTEST	1.53238	2.05374		0.42248	0	1	1	no
ENSORLG00000001003	ENSORLG00000001003	smc1b	chr6:7162181-7186251	medial	apical	OK	18.339	12.7262		-0.527115	-1.40005	0.01605	0.169417	no
ENSORLG00000001004	ENSORLG00000001004	hsd17b12b	chr3:8572829-8617885	medial	apical	NOTEST	2.20948	2.36847		0.100254	0	1	1	no
ENSORLG00000001005	ENSORLG00000001005	HNRNPLL	chr1:3528564-3540662	medial	apical	NOTEST	0	0		0	0	1	1	no
ENSORLG00000001006	ENSORLG00000001006	-	chr14:346270-347440	medial	apical	NOTEST	0.17393	0.527843		1.6016	0	1	1	no
ENSORLG00000001012	ENSORLG00000001012	-	chr10:9722678-9727247	medial	apical	NOTEST	0	0		0	0	1	1	no
ENSORLG00000001014	ENSORLG00000001014	ncapd3	chr15:3912000-3947153	medial	apical	NOTEST	2.40871	2.92973		0.282509	0	1	1	no
ENSORLG00000001015	ENSORLG00000001015	-	chr11:2395740-2415312	medial	apical	NOTEST	0	0		0	0	1	1	no
ENSORLG00000001020	ENSORLG00000001020	hapln1b	chr12:1939258-1960680	medial	apical	OK	8.44545	9.28645		0.136953	0.334426	0.5605	0.880303	no
ENSORLG00000001021	ENSORLG00000001021	borcs5	chr6:7162181-7186251	medial	apical	NOTEST	0	0		0	0	1	1	no
ENSORLG00000001022	ENSORLG00000001022	-	chr6:7228623-7306812	medial	apical	NOTEST	0	0		0	0	1	1	no
ENSORLG00000001023	ENSORLG00000001023	ryk	chr4:2763933-2806015	medial	apical	NOTEST	0.097464	0.137656		0.498122	0	1	1	no
ENSORLG00000001024	ENSORLG00000001024	elac2	chr8:2247528-2257239	medial	apical	NOTEST	0	0		0	0	1	1	no
ENSORLG00000001025	ENSORLG00000001025	fstl4	chr14:4442437-4635395	medial	apical	NOTEST	0	0		0	0	1	1	no
ENSORLG00000001026	ENSORLG00000001026	upf3b	chr10:9733102-9738402	medial	apical	NOTEST	0	0		0	0	1	1	no
ENSORLG00000001027	ENSORLG00000001027	cetn3	chr12:1967468-1970460	medial	apical	OK	83.4646	64.7546		-0.366182	-1.04247	0.0722	0.401721	no
ENSORLG00000001029	ENSORLG00000001029	rasgrp4	chr13:3025027-3054354	medial	apical	OK	57.5605	55.7106		-0.0471275	-0.146151	0.80085	0.95637	no
ENSORLG00000001030	ENSORLG00000001030	MID1IP1 (1 of many)	chr2:10149485-10149911	medial	apical	NOTEST	0	0		0	0	1	1	no
ENSORLG00000001031	ENSORLG00000001031	ZHX1 (1 of many)	chr11:2901918-2913579	medial	apical	NOTEST	0.585596	1.16231		0.989016	0	1	1	no
ENSORLG00000001033	ENSORLG00000001033	emc3	chr5:3092324-3097909	medial	apical	NOTEST	0.0541118	0		#NAME?	0	1	1	no
ENSORLG00000001035	ENSORLG00000001035	-	chr2:10151255-10164075	medial	apical	NOTEST	0	0		0	0	1	1	no
ENSORLG00000001036	ENSORLG00000001036	-	chr7:2003547-2034420	medial	apical	NOTEST	0.0294061	0.0947515		1.68803	0	1	1	no
ENSORLG00000001037	ENSORLG00000001037	nkap	chr10:9747068-9752140	medial	apical	NOTEST	0	0		0	0	1	1	no
ENSORLG00000001038	ENSORLG00000001038	ttc17	chr3:8644562-8671652	medial	apical	NOTEST	0.0700876	0.0701211		0.000689125	0	1	1	no
ENSORLG00000001039	ENSORLG00000001039	arrdc3b	chr12:2020439-2029820	medial	apical	NOTEST	0.18611	0.117428		-0.664383	0	1	1	no
ENSORLG00000001040	ENSORLG00000001040	zbtb33	chr10:9754836-9756660	medial	apical	NOTEST	0	0		0	0	1	1	no
ENSORLG00000001041	ENSORLG00000001041	rnf141	chr6:7317564-7366155	medial	apical	NOTEST	0.205322	0.0691075		-1.57097	0	1	1	no
ENSORLG00000001042	ENSORLG00000001042	map2k4a	chr8:2260670-2277036	medial	apical	NOTEST	0.154362	0.0778379		-0.987768	0	1	1	no
ENSORLG00000001043	ENSORLG00000001043	tmem220	chr8:2260670-2277036	medial	apical	NOTEST	0	0.42436		inf	0	1	1	no
ENSORLG00000001044	ENSORLG00000001044	-	chr11:2990893-3020942	medial	apical	NOTEST	0	0		0	0	1	1	no
ENSORLG00000001045	ENSORLG00000001045	sned1	chr4:2823269-2850967	medial	apical	OK	75.426	84.8074		0.169128	0.594817	0.29315	0.7258	no
ENSORLG00000001046	ENSORLG00000001046	traf6	chr3:8672089-8684411	medial	apical	NOTEST	2.83869	3.40507		0.262462	0	1	1	no
ENSORLG00000001047	ENSORLG00000001047	sco1	chr8:2260670-2277036	medial	apical	NOTEST	0.748504	0.70203		-0.0924771	0	1	1	no
ENSORLG00000001048	ENSORLG00000001048	-	chr7:2034883-2071930	medial	apical	NOTEST	0.0931728	0.0767751		-0.27927	0	1	1	no
ENSORLG00000001049	ENSORLG00000001049	-	chr1:3553280-3574705	medial	apical	NOTEST	0	0		0	0	1	1	no
ENSORLG00000001050	ENSORLG00000001050	nos1	chr9:3214635-3278363	medial	apical	OK	4.34392	5.54642		0.35256	0.950243	0.10115	0.478283	no
ENSORLG00000001051	ENSORLG00000001051	-	chr15:4137358-4171556	medial	apical	NOTEST	0.463815	0.353297		-0.392667	0	1	1	no
ENSORLG00000001052	ENSORLG00000001052	-	chr8:2278901-2318570	medial	apical	OK	90.4348	78.3846		-0.206308	-0.707148	0.2105	0.638634	no
ENSORLG00000001053	ENSORLG00000001053	-	chr5:3098111-3110920	medial	apical	NOTEST	0.662051	0.748719		0.177482	0	1	1	no
ENSORLG00000001054	ENSORLG00000001054	tmem255a	chr10:9758807-9769360	medial	apical	NOTEST	0	0		0	0	1	1	no
ENSORLG00000001055	ENSORLG00000001055	-	chr8:2278901-2318570	medial	apical	NOTEST	0	0		0	0	1	1	no
ENSORLG00000001056	ENSORLG00000001056	-	chr11:2957668-2976350	medial	apical	NOTEST	0	0		0	0	1	1	no
ENSORLG00000001057	ENSORLG00000001057	ryr1b	chr13:3059278-3178166	medial	apical	OK	9.68847	9.31001		-0.0574868	-0.181047	0.752	0.946986	no
ENSORLG00000001059	ENSORLG00000001059	ksr2	chr9:3317804-3442149	medial	apical	NOTEST	0.0812574	0.331729		2.02943	0	1	1	no
ENSORLG00000001060	ENSORLG00000001060	-	chr6:7317564-7366155	medial	apical	NOTEST	0.0344251	0		#NAME?	0	1	1	no
ENSORLG00000001061	ENSORLG00000001061	rapgef6	chr14:4761891-4885937	medial	apical	NOTEST	0	0		0	0	1	1	no
ENSORLG00000001062	ENSORLG00000001062	-	chr12:2044257-2053545	medial	apical	NOTEST	0	0		0	0	1	1	no
ENSORLG00000001063	ENSORLG00000001063	vdralpha	chr7:2100499-2167316	medial	apical	NOTEST	0.23405	0.341731		0.546045	0	1	1	no
ENSORLG00000001064	ENSORLG00000001064	rab40c	chr8:2319796-2336963	medial	apical	OK	6.55356	3.87972		-0.756326	-1.30604	0.02825	0.240514	no
ENSORLG00000001066	ENSORLG00000001066	-	chr15:4203071-4220841	medial	apical	NOTEST	3.0546	1.02475		-1.5757	0	1	1	no
ENSORLG00000001068	ENSORLG00000001068	-	chr8:2340678-2348896	medial	apical	NOTEST	0.129942	0.271603		1.06363	0	1	1	no
ENSORLG00000001069	ENSORLG00000001069	atp1b4	chr10:9774890-9779132	medial	apical	NOTEST	0.0496252	0.0771502		0.636597	0	1	1	no
ENSORLG00000001070	ENSORLG00000001070	slc38a3a	chr5:3126847-3199265	medial	apical	NOTEST	0.0518859	0		#NAME?	0	1	1	no
ENSORLG00000001071	ENSORLG00000001071	rfc5	chr9:3442419-3451388	medial	apical	NOTEST	0	0		0	0	1	1	no
ENSORLG00000001072	ENSORLG00000001072	lamp2	chr10:9783959-9793278	medial	apical	NOTEST	0.0913532	0		#NAME?	0	1	1	no
ENSORLG00000001073	ENSORLG00000001073	crocc2	chr4:2851223-2866770	medial	apical	OK	6.10961	5.78178		-0.0795688	-0.194158	0.73095	0.940999	no
ENSORLG00000001074	ENSORLG00000001074	arl6ip1	chr8:2354059-2359207	medial	apical	NOTEST	0	0		0	0	1	1	no
ENSORLG00000001075	ENSORLG00000001075	-	chr11:3077432-3113866	medial	apical	NOTEST	0.946718	0.416946		-1.18308	0	1	1	no
ENSORLG00000001076	ENSORLG00000001076	mark1	chr1:3575375-3604975	medial	apical	NOTEST	0.137523	0.133366		-0.0442835	0	1	1	no
ENSORLG00000001078	ENSORLG00000001078	-	chr8:2359613-2369869	medial	apical	NOTEST	0	0		0	0	1	1	no
ENSORLG00000001080	ENSORLG00000001080	xdh	chr2:10164149-10190520	medial	apical	NOTEST	0	0		0	0	1	1	no
ENSORLG00000001081	ENSORLG00000001081	sept5b	chr12:2074072-2083161	medial	apical	NOTEST	0.153429	0		#NAME?	0	1	1	no
ENSORLG00000001082	ENSORLG00000001082	gnai2	chr5:3204341-3251972	medial	apical	OK	24.7277	24.5062		-0.0129819	-0.0388287	0.94375	0.983473	no
ENSORLG00000001083	ENSORLG00000001083	hdac7a	chr7:2209326-2250981	medial	apical	NOTEST	0	0.0405405		inf	0	1	1	no
ENSORLG00000001084	ENSORLG00000001084	wsb2	chr9:3442419-3451388	medial	apical	NOTEST	0.0583128	0		#NAME?	0	1	1	no
ENSORLG00000001085	ENSORLG00000001085	LGALS4	chr13:3181367-3223063	medial	apical	NOTEST	0.956044	0.618844		-0.627502	0	1	1	no
ENSORLG00000001086	ENSORLG00000001086	cldn5b	chr12:2092222-2100721	medial	apical	OK	2.4209	6.22304		1.36208	0.866609	0.20975	0.637649	no
ENSORLG00000001087	ENSORLG00000001087	-	chr1:3619064-3624756	medial	apical	NOTEST	0	0		0	0	1	1	no
ENSORLG00000001088	ENSORLG00000001088	h2afy2	chr15:4485069-4497717	medial	apical	NOTEST	0.0632648	0		#NAME?	0	1	1	no
ENSORLG00000001089	ENSORLG00000001089	inka1a	chr5:3255219-3258440	medial	apical	OK	5.46975	5.99453		0.132173	0.241693	0.67175	0.925445	no
ENSORLG00000001090	ENSORLG00000001090	swap70b	chr6:7388087-7422512	medial	apical	OK	11.2151	10.8632		-0.0459877	-0.118854	0.8304	0.963392	no
ENSORLG00000001091	ENSORLG00000001091	-	chr9:3454427-3461087	medial	apical	NOTEST	0.323147	0.156321		-1.04768	0	1	1	no
ENSORLG00000001095	ENSORLG00000001095	acads	chr12:2092222-2100721	medial	apical	NOTEST	0.480841	0.628147		0.38554	0	1	1	no
ENSORLG00000001096	ENSORLG00000001096	-	chr7:2281491-2286949	medial	apical	NOTEST	0	0.196633		inf	0	1	1	no
ENSORLG00000001097	ENSORLG00000001097	klhl30	chr4:2878895-2885284	medial	apical	NOTEST	0.252532	0.390169		0.627636	0	1	1	no
ENSORLG00000001098	ENSORLG00000001098	si:dkey-16l2.16	chr8:2373009-2385218	medial	apical	NOTEST	0	0		0	0	1	1	no
ENSORLG00000001099	ENSORLG00000001099	-	chr2:621647-644439	medial	apical	NOTEST	0	0		0	0	1	1	no
ENSORLG00000001103	ENSORLG00000001103	pebp1	chr9:3466530-3525537	medial	apical	NOTEST	0.0209343	0.0589062		1.49255	0	1	1	no
ENSORLG00000001105	ENSORLG00000001105	vps52	chr11:3217091-3239088	medial	apical	NOTEST	0	0		0	0	1	1	no
ENSORLG00000001106	ENSORLG00000001106	trpm5	chr3:8689218-8715047	medial	apical	NOTEST	0	0		0	0	1	1	no
ENSORLG00000001107	ENSORLG00000001107	espnla	chr4:2885304-2890892	medial	apical	NOTEST	0.229684	0.500223		1.12292	0	1	1	no
ENSORLG00000001108	ENSORLG00000001108	crybb1	chr12:2101158-2104286	medial	apical	NOTEST	0	0		0	0	1	1	no
ENSORLG00000001109	ENSORLG00000001109	-	chr1:3626339-3638371	medial	apical	NOTEST	0.0712422	0.10085		0.501414	0	1	1	no
ENSORLG00000001110	ENSORLG00000001110	cul4b	chr10:9794983-9807751	medial	apical	NOTEST	0.0740838	0		#NAME?	0	1	1	no
ENSORLG00000001111	ENSORLG00000001111	-	chr14:4925425-4961320	medial	apical	NOTEST	0	0		0	0	1	1	no
ENSORLG00000001112	ENSORLG00000001112	wee1	chr6:7427103-7434539	medial	apical	NOTEST	0.281124	0.365807		0.379876	0	1	1	no
ENSORLG00000001113	ENSORLG00000001113	rps18	chr11:3217091-3239088	medial	apical	NOTEST	0	0		0	0	1	1	no
ENSORLG00000001114	ENSORLG00000001114	anapc2	chr8:2373009-2385218	medial	apical	OK	27.5163	21.8709		-0.331272	-0.993448	0.08295	0.430021	no
ENSORLG00000001115	ENSORLG00000001115	-	chr3:8726645-8730177	medial	apical	NOTEST	0.304271	0.335406		0.140555	0	1	1	no
ENSORLG00000001116	ENSORLG00000001116	AXL	chr13:3181367-3223063	medial	apical	OK	4.64712	6.87037		0.564049	1.09667	0.06195	0.37548	no
ENSORLG00000001117	ENSORLG00000001117	rcor3	chr1:3639848-3655630	medial	apical	OK	7.14282	8.95878		0.326809	0.770763	0.18045	0.5998	no
ENSORLG00000001119	ENSORLG00000001119	rnf25	chr8:2386522-2390577	medial	apical	OK	5.62458	7.04832		0.325534	0.544167	0.33535	0.760857	no
ENSORLG00000001120	ENSORLG00000001120	kcnq1	chr3:8737165-8818989	medial	apical	NOTEST	0.203822	0.101758		-1.00217	0	1	1	no
ENSORLG00000001122	ENSORLG00000001122	c1galt1c1	chr10:9809251-9814481	medial	apical	OK	32.9782	13.688		-1.2686	-1.36088	0.02815	0.240176	no
ENSORLG00000001123	ENSORLG00000001123	-	chr2:10200192-10204341	medial	apical	NOTEST	0	0		0	0	1	1	no
ENSORLG00000001125	ENSORLG00000001125	-	chr9:3466530-3525537	medial	apical	NOTEST	0.0701525	0.0189027		-1.8919	0	1	1	no
ENSORLG00000001126	ENSORLG00000001126	scly	chr4:2899835-2918225	medial	apical	OK	2.14946	3.70715		0.786338	0.628324	0.2793	0.712056	no
ENSORLG00000001127	ENSORLG00000001127	RING1	chr11:3217091-3239088	medial	apical	NOTEST	0.0738383	0.102101		0.467562	0	1	1	no
ENSORLG00000001128	ENSORLG00000001128	lingo1b	chr3:8929772-8955728	medial	apical	NOTEST	0	0.264915		inf	0	1	1	no
ENSORLG00000001129	ENSORLG00000001129	plxna1a	chr7:2447029-2708135	medial	apical	NOTEST	0.540756	0.28429		-0.927617	0	1	1	no
ENSORLG00000001130	ENSORLG00000001130	znf143b	chr6:7436406-7446988	medial	apical	NOTEST	0	0		0	0	1	1	no
ENSORLG00000001131	ENSORLG00000001131	irf1b	chr14:4970477-4972418	medial	apical	NOTEST	0	0		0	0	1	1	no
ENSORLG00000001133	ENSORLG00000001133	grk3	chr12:2117629-2163782	medial	apical	OK	10.3735	11.3648		0.13167	0.28967	0.61105	0.906897	no
ENSORLG00000001134	ENSORLG00000001134	dnajc27	chr2:10210871-10222000	medial	apical	NOTEST	0	0		0	0	1	1	no
ENSORLG00000001136	ENSORLG00000001136	akip1	chr6:7460273-7462694	medial	apical	NOTEST	0.470259	0.49103		0.0623561	0	1	1	no
ENSORLG00000001137	ENSORLG00000001137	kat8	chr8:2391117-2410138	medial	apical	OK	28.6611	38.1456		0.412423	1.25427	0.0278	0.238547	no
ENSORLG00000001139	ENSORLG00000001139	gbf1	chr15:4501244-4577360	medial	apical	NOTEST	0	0		0	0	1	1	no
ENSORLG00000001140	ENSORLG00000001140	-	chr3:9749438-9750013	medial	apical	NOTEST	0.642616	0.830422		0.369887	0	1	1	no
ENSORLG00000001141	ENSORLG00000001141	creg1	chr2:10249619-10260359	medial	apical	NOTEST	0	0		0	0	1	1	no
ENSORLG00000001142	ENSORLG00000001142	-	chr8:2391117-2410138	medial	apical	NOTEST	0.275583	0.693903		1.33224	0	1	1	no
ENSORLG00000001144	ENSORLG00000001144	RPL27A	chr6:7463425-7466255	medial	apical	NOTEST	0	0		0	0	1	1	no
ENSORLG00000001145	ENSORLG00000001145	slc22a4	chr14:4975042-5025003	medial	apical	NOTEST	0	0		0	0	1	1	no
ENSORLG00000001147	ENSORLG00000001147	-	chr2:10249619-10260359	medial	apical	NOTEST	0	0		0	0	1	1	no
ENSORLG00000001149	ENSORLG00000001149	si:ch211-264f5.8	chr11:3347579-3584710	medial	apical	OK	8.21125	7.22081		-0.18544	-0.392295	0.4948	0.854199	no
ENSORLG00000001150	ENSORLG00000001150	bbox1	chr3:9757653-9788557	medial	apical	NOTEST	0.501315	0.981361		0.969067	0	1	1	no
ENSORLG00000001154	ENSORLG00000001154	suds3	chr9:3528776-3542263	medial	apical	NOTEST	1.06317	0		#NAME?	0	1	1	no
ENSORLG00000001156	ENSORLG00000001156	SLC41A3	chr7:2948938-2970053	medial	apical	NOTEST	0	0		0	0	1	1	no
ENSORLG00000001157	ENSORLG00000001157	zgc:163025	chr2:10266910-10275643	medial	apical	NOTEST	0	0		0	0	1	1	no
ENSORLG00000001160	ENSORLG00000001160	-	chr1:3658539-3719669	medial	apical	NOTEST	0.594657	0.146044		-2.02565	0	1	1	no
ENSORLG00000001161	ENSORLG00000001161	si:ch73-335m24.2	chr10:9837131-9844588	medial	apical	NOTEST	1.55973	0.466798		-1.74042	0	1	1	no
ENSORLG00000001164	ENSORLG00000001164	gcnt7	chr5:12746483-12786228	medial	apical	OK	11.2388	11.0948		-0.0186125	-0.0124079	0.9826	0.9937	no
ENSORLG00000001167	ENSORLG00000001167	-	chr11:3695346-3695637	medial	apical	NOTEST	0	0		0	0	1	1	no
ENSORLG00000001168	ENSORLG00000001168	-	chr12:2177283-2190978	medial	apical	NOTEST	0.0259726	0		#NAME?	0	1	1	no
ENSORLG00000001171	ENSORLG00000001171	-	chr6:7511638-7540296	medial	apical	NOTEST	1.96589	2.02036		0.0394331	0	1	1	no
ENSORLG00000001174	ENSORLG00000001174	hspa12a	chr15:4650250-4714926	medial	apical	NOTEST	0.333429	0.219947		-0.600225	0	1	1	no
ENSORLG00000001175	ENSORLG00000001175	-	chr8:2577027-2602946	medial	apical	NOTEST	0.934662	0.812107		-0.202775	0	1	1	no
ENSORLG00000001177	ENSORLG00000001177	srrm4	chr9:3702057-3767991	medial	apical	NOTEST	0	0		0	0	1	1	no
ENSORLG00000001178	ENSORLG00000001178	-	chr11:3822603-3825664	medial	apical	NOTEST	0.68362	0		#NAME?	0	1	1	no
ENSORLG00000001180	ENSORLG00000001180	f7	chr2:10276912-10286210	medial	apical	NOTEST	0	0		0	0	1	1	no
ENSORLG00000001182	ENSORLG00000001182	-	chr11:3870212-3870500	medial	apical	NOTEST	0	0		0	0	1	1	no
ENSORLG00000001185	ENSORLG00000001185	slc22a5	chr14:4975042-5025003	medial	apical	NOTEST	0	0		0	0	1	1	no
ENSORLG00000001189	ENSORLG00000001189	cpne9	chr7:3053317-3134687	medial	apical	NOTEST	0	0		0	0	1	1	no
ENSORLG00000001193	ENSORLG00000001193	-	chr9:3771539-3785762	medial	apical	NOTEST	0	0		0	0	1	1	no
ENSORLG00000001194	ENSORLG00000001194	ocrl	chr10:9846425-9886631	medial	apical	OK	271.524	267.041		-0.024019	-0.0823399	0.88515	0.973493	no
ENSORLG00000001195	ENSORLG00000001195	sez6l	chr12:2239530-2260854	medial	apical	NOTEST	0	0		0	0	1	1	no
ENSORLG00000001201	ENSORLG00000001201	-	chr1:3792997-3795210	medial	apical	OK	169.314	158.863		-0.0919202	-0.309496	0.58725	0.894218	no
ENSORLG00000001202	ENSORLG00000001202	-	chr10:9846425-9886631	medial	apical	OK	10.7881	9.63977		-0.162373	-0.110059	0.84785	0.967199	no
ENSORLG00000001204	ENSORLG00000001204	-	chr12:2266740-2269204	medial	apical	NOTEST	0	0		0	0	1	1	no
ENSORLG00000001206	ENSORLG00000001206	zgc:100868 (1 of many)	chr8:2553860-2563912	medial	apical	NOTEST	0.146027	0.82687		2.50143	0	1	1	no
ENSORLG00000001208	ENSORLG00000001208	lhfpl4a	chr7:3185086-3211444	medial	apical	NOTEST	0	0		0	0	1	1	no
ENSORLG00000001209	ENSORLG00000001209	-	chr8:2646487-2652769	medial	apical	NOTEST	2.17023	1.66841		-0.379377	0	1	1	no
ENSORLG00000001210	ENSORLG00000001210	znrf3	chr9:3852926-3952308	medial	apical	NOTEST	0	0		0	0	1	1	no
ENSORLG00000001211	ENSORLG00000001211	-	chr2:10286879-10297849	medial	apical	NOTEST	0	0		0	0	1	1	no
ENSORLG00000001213	ENSORLG00000001213	-	chr8:2656620-2661799	medial	apical	NOTEST	0.174475	0.40652		1.2203	0	1	1	no
ENSORLG00000001215	ENSORLG00000001215	coq5	chr9:3852926-3952308	medial	apical	NOTEST	1.99726	1.9536		-0.0318808	0	1	1	no
ENSORLG00000001217	ENSORLG00000001217	psma1	chr6:7543600-7546726	medial	apical	NOTEST	0.192676	0		#NAME?	0	1	1	no
ENSORLG00000001218	ENSORLG00000001218	-	chr11:3900761-4032527	medial	apical	OK	41.6561	46.8724		0.170214	0.568606	0.3181	0.748929	no
ENSORLG00000001220	ENSORLG00000001220	atp6v1ba	chr15:4799539-4840072	medial	apical	NOTEST	0.0446602	0		#NAME?	0	1	1	no
ENSORLG00000001221	ENSORLG00000001221	rbm34	chr1:3871326-3876209	medial	apical	OK	47.2794	28.9542	76.2336	-0.707441	-1.84261	0.0022	0.0441324	yes
ENSORLG00000001222	ENSORLG00000001222	calcb	chr6:7579010-7584158	medial	apical	NOTEST	0.0460957	0.284654		2.62651	0	1	1	no
ENSORLG00000001223	ENSORLG00000001223	tbt-bp1	chr11:4284380-4293538	medial	apical	NOTEST	0.629141	0.927437		0.559865	0	1	1	no
ENSORLG00000001225	ENSORLG00000001225	-	chr13:3237566-3270550	medial	apical	OK	9.70424	8.95524		-0.115883	-0.185592	0.74135	0.94408	no
ENSORLG00000001226	ENSORLG00000001226	slc22a21	chr14:5026868-5054313	medial	apical	NOTEST	0	0		0	0	1	1	no
ENSORLG00000001227	ENSORLG00000001227	mrps30	chr9:3955454-3963319	medial	apical	NOTEST	2.15395	2.20348		0.0328009	0	1	1	no
ENSORLG00000001230	ENSORLG00000001230	srsf2b	chr8:2675401-2679729	medial	apical	NOTEST	3.29335	2.5318		-0.379389	0	1	1	no
ENSORLG00000001231	ENSORLG00000001231	pcid2	chr2:10301039-10308361	medial	apical	NOTEST	0	0		0	0	1	1	no
ENSORLG00000001234	ENSORLG00000001234	-	chr5:3514731-3516420	medial	apical	NOTEST	0	0		0	0	1	1	no
ENSORLG00000001235	ENSORLG00000001235	hint2	chr9:3955454-3963319	medial	apical	NOTEST	0.290693	0.654973		1.17194	0	1	1	no
ENSORLG00000001237	ENSORLG00000001237	-	chr14:5026868-5054313	medial	apical	NOTEST	0	0		0	0	1	1	no
ENSORLG00000001238	ENSORLG00000001238	-	chr13:3237566-3270550	medial	apical	NOTEST	2.64999	2.06351		-0.360886	0	1	1	no
ENSORLG00000001239	ENSORLG00000001239	-	chr2:10309682-10320694	medial	apical	NOTEST	0	0		0	0	1	1	no
ENSORLG00000001240	ENSORLG00000001240	-	chr11:4348924-4350503	medial	apical	OK	22.2874	28.5063		0.355051	0.69236	0.23265	0.661343	no
ENSORLG00000001244	ENSORLG00000001244	si:ch211-48m9.1	chr12:2270054-2294913	medial	apical	NOTEST	0.145114	0.210326		0.535441	0	1	1	no
ENSORLG00000001245	ENSORLG00000001245	rfx5	chr11:4372458-4380866	medial	apical	OK	9.60986	8.05119		-0.255313	-0.541027	0.32925	0.758456	no
ENSORLG00000001246	ENSORLG00000001246	si:ch211-220i18.4	chr7:3239916-3250896	medial	apical	NOTEST	0	0		0	0	1	1	no
ENSORLG00000001247	ENSORLG00000001247	-	chr5:3558183-3563710	medial	apical	NOTEST	0	0		0	0	1	1	no
ENSORLG00000001248	ENSORLG00000001248	-	chr2:10441081-10446144	medial	apical	NOTEST	0	0		0	0	1	1	no
ENSORLG00000001249	ENSORLG00000001249	INSC	chr6:7587840-7664345	medial	apical	OK	3.34069	4.06829		0.284274	0.508002	0.3606	0.775333	no
ENSORLG00000001250	ENSORLG00000001250	tacr1b	chr12:2309198-2318431	medial	apical	NOTEST	0.257006	0.160452		-0.679662	0	1	1	no
ENSORLG00000001251	ENSORLG00000001251	xpnpep2	chr10:10005848-10020982	medial	apical	NOTEST	0	0		0	0	1	1	no
ENSORLG00000001252	ENSORLG00000001252	-	chr6:7692545-7734781	medial	apical	NOTEST	0	0		0	0	1	1	no
ENSORLG00000001253	ENSORLG00000001253	tbce	chr1:3876858-3929169	medial	apical	OK	15.8725	12.0227		-0.400759	-1.08858	0.0594	0.367092	no
ENSORLG00000001254	ENSORLG00000001254	-	chr9:3964835-3981042	medial	apical	OK	7.95696	6.51073		-0.2894	-0.718207	0.2129	0.64114	no
ENSORLG00000001255	ENSORLG00000001255	-	chr13:3274203-3283283	medial	apical	OK	6.98916	5.29128		-0.401503	-0.585433	0.30065	0.734541	no
ENSORLG00000001256	ENSORLG00000001256	mfsd11	chr8:2679993-2685573	medial	apical	OK	49.221	38.3329		-0.360693	-0.977009	0.0851	0.435034	no
ENSORLG00000001257	ENSORLG00000001257	sec61a1	chr5:3576672-3583182	medial	apical	NOTEST	0	0		0	0	1	1	no
ENSORLG00000001259	ENSORLG00000001259	madd	chr3:9789156-9853601	medial	apical	NOTEST	0.422216	0.298978		-0.497941	0	1	1	no
ENSORLG00000001260	ENSORLG00000001260	sox6a	chr6:7753306-7883921	medial	apical	NOTEST	0.0881899	0		#NAME?	0	1	1	no
ENSORLG00000001261	ENSORLG00000001261	sash3	chr10:10027383-10035747	medial	apical	NOTEST	0.0481484	0		#NAME?	0	1	1	no
ENSORLG00000001264	ENSORLG00000001264	-	chr11:4384919-4401851	medial	apical	OK	10.6405	10.3534		-0.0394685	-0.0948094	0.87015	0.97017	no
ENSORLG00000001265	ENSORLG00000001265	kif1aa	chr4:2933641-2978278	medial	apical	OK	4.46317	5.14983		0.206455	0.530645	0.3472	0.765224	no
ENSORLG00000001266	ENSORLG00000001266	zgc:56106	chr6:7896660-7899423	medial	apical	NOTEST	0.163886	0		#NAME?	0	1	1	no
ENSORLG00000001267	ENSORLG00000001267	gabrg2	chr14:6195303-6255304	medial	apical	NOTEST	0	0		0	0	1	1	no
ENSORLG00000001268	ENSORLG00000001268	ubald2	chr8:2702718-2709853	medial	apical	OK	17.2537	29.0715		0.752703	1.38072	0.0161	0.169417	no
ENSORLG00000001269	ENSORLG00000001269	rfx5	chr11:4409590-4417187	medial	apical	NOTEST	2.8473	2.86938		0.0111442	0	1	1	no
ENSORLG00000001271	ENSORLG00000001271	zdhhc9	chr10:10038853-10068568	medial	apical	OK	50.3422	51.1473		0.0228903	0.0773159	0.8922	0.975658	no
ENSORLG00000001272	ENSORLG00000001272	tgfb1a	chr13:3287049-3304989	medial	apical	OK	8.58806	12.9195		0.589148	1.15914	0.04845	0.326431	no
ENSORLG00000001273	ENSORLG00000001273	nid1b	chr1:3876858-3929169	medial	apical	NOTEST	2.83194	2.35371		-0.266854	0	1	1	no
ENSORLG00000001274	ENSORLG00000001274	ccni2	chr14:6555749-6595809	medial	apical	NOTEST	0	0		0	0	1	1	no
ENSORLG00000001276	ENSORLG00000001276	foxj1	chr8:2713288-2718630	medial	apical	OK	81.0744	92.519		0.190502	0.659613	0.25155	0.680251	no
ENSORLG00000001277	ENSORLG00000001277	-	chr1:3876858-3929169	medial	apical	NOTEST	0.126505	0.127346		0.00956352	0	1	1	no
ENSORLG00000001278	ENSORLG00000001278	plekha7a	chr6:7902714-8040227	medial	apical	NOTEST	0.0994692	0.0927347		-0.101141	0	1	1	no
ENSORLG00000001280	ENSORLG00000001280	trmt12	chr10:10069923-10076433	medial	apical	OK	6.71566	5.19789		-0.369601	-0.813085	0.1565	0.564115	no
ENSORLG00000001282	ENSORLG00000001282	amdhd2	chr8:2729925-2739384	medial	apical	OK	20.0579	29.0001		0.531893	1.61236	0.00525	0.0809499	no
ENSORLG00000001283	ENSORLG00000001283	psmb4	chr11:4417809-4420605	medial	apical	OK	3.92967	4.01905		0.0324464	0.0440406	0.95435	0.98693	no
ENSORLG00000001284	ENSORLG00000001284	si:ch211-214j8.1	chr9:3986375-4135248	medial	apical	OK	17.1011	14.3485		-0.253182	-0.293416	0.60645	0.904623	no
ENSORLG00000001286	ENSORLG00000001286	nr1h3	chr3:9854891-9873998	medial	apical	NOTEST	0.159325	0.409309		1.36122	0	1	1	no
ENSORLG00000001287	ENSORLG00000001287	TTC39C (1 of many)	chr4:2983164-3003594	medial	apical	NOTEST	0.0920521	0.31113		1.75699	0	1	1	no
ENSORLG00000001288	ENSORLG00000001288	cdh5	chr15:5033390-5061663	medial	apical	NOTEST	0.114816	0		#NAME?	0	1	1	no
ENSORLG00000001289	ENSORLG00000001289	rps13	chr6:8063036-8075226	medial	apical	NOTEST	0	0		0	0	1	1	no
ENSORLG00000001291	ENSORLG00000001291	-	chr11:4421546-4432780	medial	apical	NOTEST	2.86515	2.60887		-0.135186	0	1	1	no
ENSORLG00000001292	ENSORLG00000001292	pik3c2a	chr6:8076352-8130622	medial	apical	NOTEST	0.327301	0.352881		0.108563	0	1	1	no
ENSORLG00000001294	ENSORLG00000001294	gpr137bb	chr1:3938767-3950296	medial	apical	NOTEST	0.494836	0.81215		0.714795	0	1	1	no
ENSORLG00000001296	ENSORLG00000001296	kcna4	chr3:9905025-9907086	medial	apical	NOTEST	0.0748553	0		#NAME?	0	1	1	no
ENSORLG00000001298	ENSORLG00000001298	sytl4	chr10:10077017-10101340	medial	apical	OK	43.1615	39.5779		-0.125049	-0.251193	0.65485	0.919843	no
ENSORLG00000001299	ENSORLG00000001299	uroc1	chr5:3591719-3617009	medial	apical	NOTEST	0.109885	0.237191		1.11006	0	1	1	no
ENSORLG00000001300	ENSORLG00000001300	plxnb1a	chr7:3253791-3292126	medial	apical	NOTEST	0.208351	0.580448		1.47815	0	1	1	no
ENSORLG00000001301	ENSORLG00000001301	ppp5c	chr13:3336787-3349187	medial	apical	OK	4.70444	7.16185		0.606311	1.01073	0.0769	0.414544	no
ENSORLG00000001303	ENSORLG00000001303	gpr155b	chr15:5168969-5181720	medial	apical	NOTEST	0	0		0	0	1	1	no
ENSORLG00000001304	ENSORLG00000001304	scarb1	chr12:2321622-2338855	medial	apical	NOTEST	0.250525	0		#NAME?	0	1	1	no
ENSORLG00000001305	ENSORLG00000001305	-	chr3:10036642-10066946	medial	apical	NOTEST	0.217314	0.204101		-0.0905016	0	1	1	no
ENSORLG00000001306	ENSORLG00000001306	-	chr13:3351344-3356144	medial	apical	NOTEST	0	0		0	0	1	1	no
ENSORLG00000001308	ENSORLG00000001308	NUCB2 (1 of many)	chr6:8137024-8141870	medial	apical	NOTEST	0.801588	2.00224		1.32068	0	1	1	no
ENSORLG00000001311	ENSORLG00000001311	srpx2	chr10:10077017-10101340	medial	apical	OK	76.6171	77.1717		0.0104057	0.0286311	0.9595	0.98734	no
ENSORLG00000001312	ENSORLG00000001312	CLASP1	chr2:10459215-10510812	medial	apical	NOTEST	0	0		0	0	1	1	no
ENSORLG00000001313	ENSORLG00000001313	sept8a	chr14:6555749-6595809	medial	apical	NOTEST	0	0		0	0	1	1	no
ENSORLG00000001314	ENSORLG00000001314	si:dkey-10o6.2	chr6:8144043-8154703	medial	apical	OK	8.40806	9.9894		0.248624	0.360212	0.5283	0.866805	no
ENSORLG00000001315	ENSORLG00000001315	-	chr13:3358538-3359481	medial	apical	NOTEST	0	0		0	0	1	1	no
ENSORLG00000001316	ENSORLG00000001316	ero1b	chr1:3950971-3969623	medial	apical	NOTEST	0.59585	0.853758		0.518878	0	1	1	no
ENSORLG00000001318	ENSORLG00000001318	rcvrna	chr8:2740802-2804787	medial	apical	NOTEST	1.05109	0		#NAME?	0	1	1	no
ENSORLG00000001319	ENSORLG00000001319	-	chr13:3361570-3363438	medial	apical	NOTEST	0	0		0	0	1	1	no
ENSORLG00000001320	ENSORLG00000001320	gabpb2a	chr11:4466010-4471603	medial	apical	OK	20.3927	23.3551		0.195681	0.443416	0.4359	0.821805	no
ENSORLG00000001321	ENSORLG00000001321	erap1b (1 of many)	chr9:3986375-4135248	medial	apical	OK	23.5989	24.7686		0.0697904	0.0779293	0.89465	0.976379	no
ENSORLG00000001323	ENSORLG00000001323	-	chr13:3370347-3371016	medial	apical	OK	4.0967	0.970469		-2.07771	-1.22192	0.0417	0.295297	no
ENSORLG00000001324	ENSORLG00000001324	rabggta	chr4:3006514-3020810	medial	apical	NOTEST	0.350283	0.098577		-1.8292	0	1	1	no
ENSORLG00000001325	ENSORLG00000001325	pfkfb4b	chr5:3624400-3641923	medial	apical	NOTEST	0.200411	0.107517		-0.898394	0	1	1	no
ENSORLG00000001327	ENSORLG00000001327	-	chr13:3395234-3408763	medial	apical	NOTEST	0	0		0	0	1	1	no
ENSORLG00000001328	ENSORLG00000001328	gli2b	chr2:10535420-10608834	medial	apical	NOTEST	0	0		0	0	1	1	no
ENSORLG00000001329	ENSORLG00000001329	tdg.2	chr6:8167949-8172788	medial	apical	NOTEST	0.733672	1.52156		1.05234	0	1	1	no
ENSORLG00000001331	ENSORLG00000001331	-	chr13:3389647-3392738	medial	apical	NOTEST	0	0		0	0	1	1	no
ENSORLG00000001332	ENSORLG00000001332	mtx2	chr15:5184852-5192948	medial	apical	NOTEST	0.0765085	0		#NAME?	0	1	1	no
ENSORLG00000001338	ENSORLG00000001338	-	chr1:3323582-3323993	medial	apical	OK	54.2578	57.3871		0.0808973	0.152305	0.79495	0.9563	no
ENSORLG00000001339	ENSORLG00000001339	arpc4 (1 of many)	chr5:25368567-25387464	medial	apical	OK	3.7339	4.13243		0.146305	0.0335208	0.95195	0.985844	no
ENSORLG00000001340	ENSORLG00000001340	INHBB	chr2:10778722-10782641	medial	apical	NOTEST	0	0		0	0	1	1	no
ENSORLG00000001341	ENSORLG00000001341	rhbdd1	chr13:3417419-3422314	medial	apical	NOTEST	0.286006	0.539353		0.915184	0	1	1	no
ENSORLG00000001343	ENSORLG00000001343	tspan7	chr10:10102031-10113815	medial	apical	OK	25.504	31.4074		0.300382	0.842011	0.1449	0.547832	no
ENSORLG00000001344	ENSORLG00000001344	anp32e	chr11:4474399-4480565	medial	apical	OK	113.836	121.716		0.0965645	0.241578	0.67485	0.925445	no
ENSORLG00000001345	ENSORLG00000001345	-	chr3:10067046-10101238	medial	apical	NOTEST	0.0682526	0.033013		-1.04785	0	1	1	no
ENSORLG00000001346	ENSORLG00000001346	hoxD4b	chr15:5198836-5200882	medial	apical	NOTEST	0.0501642	0		#NAME?	0	1	1	no
ENSORLG00000001347	ENSORLG00000001347	dhrs7ca	chr8:2822787-2828651	medial	apical	OK	2.42518	3.80974		0.651599	0.808698	0.16655	0.57346	no
ENSORLG00000001348	ENSORLG00000001348	-	chr10:10115256-10115745	medial	apical	OK	3.0155	5.1695		0.777628	0.429024	0.4476	0.825854	no
ENSORLG00000001349	ENSORLG00000001349	-	chr15:5220180-5226549	medial	apical	NOTEST	0	0		0	0	1	1	no
ENSORLG00000001350	ENSORLG00000001350	krt5	chr7:3422556-3443749	medial	apical	NOTEST	1.53855	2.24068		0.542363	0	1	1	no
ENSORLG00000001351	ENSORLG00000001351	-	chr5:3651013-3661017	medial	apical	NOTEST	0	0		0	0	1	1	no
ENSORLG00000001352	ENSORLG00000001352	plekho1a	chr11:4492480-4516352	medial	apical	NOTEST	0.926976	1.0943		0.239406	0	1	1	no
ENSORLG00000001355	ENSORLG00000001355	-	chr2:10792578-10799023	medial	apical	NOTEST	0	0		0	0	1	1	no
ENSORLG00000001356	ENSORLG00000001356	si:ch211-157b11.8	chr5:3662158-3671310	medial	apical	NOTEST	0.055939	0		#NAME?	0	1	1	no
ENSORLG00000001357	ENSORLG00000001357	galnt17	chr13:3428298-3469444	medial	apical	NOTEST	0	0		0	0	1	1	no
ENSORLG00000001358	ENSORLG00000001358	TGM1	chr4:3025078-3040442	medial	apical	NOTEST	0	0		0	0	1	1	no
ENSORLG00000001360	ENSORLG00000001360	-	chr11:4516707-4523018	medial	apical	OK	31.5478	58.8675	90.4153	0.899934	2.59605	5e-05	0.00225489	yes
ENSORLG00000001361	ENSORLG00000001361	aff4	chr14:6635101-6652929	medial	apical	NOTEST	0	0		0	0	1	1	no
ENSORLG00000001365	ENSORLG00000001365	grk5	chr12:2346815-2372913	medial	apical	NOTEST	3.45638	3.39737		-0.0248428	0	1	1	no
ENSORLG00000001366	ENSORLG00000001366	lnpk	chr15:5227438-5270518	medial	apical	NOTEST	0.103896	0.194371		0.903674	0	1	1	no
ENSORLG00000001367	ENSORLG00000001367	-	chr8:2846430-2849621	medial	apical	NOTEST	0.0657942	0.296488		2.17194	0	1	1	no
ENSORLG00000001368	ENSORLG00000001368	gata2	chr5:3685607-3693508	medial	apical	NOTEST	0.0589095	0		#NAME?	0	1	1	no
ENSORLG00000001372	ENSORLG00000001372	zcchc10	chr14:6663074-6669242	medial	apical	NOTEST	0	0		0	0	1	1	no
ENSORLG00000001373	ENSORLG00000001373	samm50	chr6:8172837-8189846	medial	apical	NOTEST	1.4794	1.45647		-0.0225397	0	1	1	no
ENSORLG00000001374	ENSORLG00000001374	agap1	chr2:10806887-10937291	medial	apical	NOTEST	0	0		0	0	1	1	no
ENSORLG00000001375	ENSORLG00000001375	ltv1	chr1:3981262-3991590	medial	apical	NOTEST	0.522333	0.397587		-0.393699	0	1	1	no
ENSORLG00000001377	ENSORLG00000001377	eefsec	chr5:3763003-3788174	medial	apical	NOTEST	0.018127	0.301767		4.05722	0	1	1	no
ENSORLG00000001379	ENSORLG00000001379	CHRNA1 (1 of many)	chr15:5227438-5270518	medial	apical	OK	25.5762	15.5895		-0.714229	-0.925076	0.22465	0.653151	no
ENSORLG00000001380	ENSORLG00000001380	cstf2	chr10:10186123-10202414	medial	apical	NOTEST	0.698985	0.498627		-0.487301	0	1	1	no
ENSORLG00000001381	ENSORLG00000001381	gak	chr9:4198145-4221210	medial	apical	NOTEST	0	0		0	0	1	1	no
ENSORLG00000001382	ENSORLG00000001382	-	chr4:3117462-3153777	medial	apical	NOTEST	0.46028	0.512946		0.156296	0	1	1	no
ENSORLG00000001384	ENSORLG00000001384	si:ch73-281f12.4	chr8:2901557-2917738	medial	apical	OK	24.8331	24.9711		0.00799145	0.0239964	0.96655	0.989363	no
ENSORLG00000001385	ENSORLG00000001385	api5	chr6:8189872-8198620	medial	apical	NOTEST	1.75756	1.62261		-0.115256	0	1	1	no
ENSORLG00000001387	ENSORLG00000001387	ifngr1	chr1:3992045-4009694	medial	apical	NOTEST	0.293306	0.270084		-0.119001	0	1	1	no
ENSORLG00000001389	ENSORLG00000001389	ash2l	chr12:2346815-2372913	medial	apical	OK	63.7479	76.3228		0.259737	0.752207	0.19835	0.62223	no
ENSORLG00000001390	ENSORLG00000001390	vps45	chr11:4524502-4534911	medial	apical	OK	2257.14	3677.72	5934.86	0.704317	2.18607	0.00015	0.0055882	yes
ENSORLG00000001392	ENSORLG00000001392	krt8	chr7:3522590-3527333	medial	apical	OK	25.9034	24.9571		-0.0536891	-0.153315	0.789	0.955563	no
ENSORLG00000001393	ENSORLG00000001393	tyw1	chr13:3544614-3590914	medial	apical	OK	22.0311	12.102	34.1331	-0.864302	-2.13106	0.0005	0.0147734	yes
ENSORLG00000001395	ENSORLG00000001395	grap2a	chr8:2922430-2951063	medial	apical	NOTEST	0	0		0	0	1	1	no
ENSORLG00000001398	ENSORLG00000001398	ruvbl1	chr5:3763003-3788174	medial	apical	NOTEST	0.0224444	0		#NAME?	0	1	1	no
ENSORLG00000001399	ENSORLG00000001399	ddb1	chr3:10101925-10153478	medial	apical	NOTEST	0.0230004	0		#NAME?	0	1	1	no
ENSORLG00000001401	ENSORLG00000001401	fam83fa	chr8:2922430-2951063	medial	apical	NOTEST	0.889853	1.17988		0.407005	0	1	1	no
ENSORLG00000001403	ENSORLG00000001403	aebp1	chr12:2384162-2416122	medial	apical	OK	25.482	26.2096		0.0406172	0.0785054	0.8903	0.975168	no
ENSORLG00000001406	ENSORLG00000001406	nox1	chr10:10186123-10202414	medial	apical	NOTEST	0	0		0	0	1	1	no
ENSORLG00000001407	ENSORLG00000001407	rft1	chr5:3788497-3811873	medial	apical	NOTEST	0	0		0	0	1	1	no
ENSORLG00000001408	ENSORLG00000001408	-	chr13:3591264-3597215	medial	apical	NOTEST	1.57782	1.40499		-0.167371	0	1	1	no
ENSORLG00000001410	ENSORLG00000001410	cyth4a	chr8:2951369-2959605	medial	apical	NOTEST	0.788088	0.698886		-0.173301	0	1	1	no
ENSORLG00000001411	ENSORLG00000001411	-	chr1:4045155-4060727	medial	apical	NOTEST	0.750063	1.19504		0.671973	0	1	1	no
ENSORLG00000001413	ENSORLG00000001413	mcm8	chr15:6460244-6475688	medial	apical	NOTEST	0.0651607	0.0746532		0.196203	0	1	1	no
ENSORLG00000001414	ENSORLG00000001414	impact	chr4:3117462-3153777	medial	apical	NOTEST	0.064039	0		#NAME?	0	1	1	no
ENSORLG00000001415	ENSORLG00000001415	sstr3	chr8:2998801-3029334	medial	apical	NOTEST	0.13302	0.202449		0.605918	0	1	1	no
ENSORLG00000001416	ENSORLG00000001416	xkrx	chr10:10202434-10217504	medial	apical	NOTEST	0.107067	0.110962		0.0515517	0	1	1	no
ENSORLG00000001418	ENSORLG00000001418	pld3	chr13:3602675-3610851	medial	apical	NOTEST	0	0		0	0	1	1	no
ENSORLG00000001420	ENSORLG00000001420	crls1	chr15:6475847-6494095	medial	apical	NOTEST	0.229525	0.224084		-0.0346162	0	1	1	no
ENSORLG00000001421	ENSORLG00000001421	hsd17b12a	chr6:8240695-8256589	medial	apical	OK	16.3951	3.17796	19.5731	-2.36709	-4.86998	5e-05	0.00225489	yes
ENSORLG00000001422	ENSORLG00000001422	rhoq	chr15:6501774-6519440	medial	apical	NOTEST	0	0		0	0	1	1	no
ENSORLG00000001425	ENSORLG00000001425	arl13a	chr10:10220516-10224897	medial	apical	NOTEST	0.741071	1.68793		1.18757	0	1	1	no
ENSORLG00000001426	ENSORLG00000001426	socs5	chr15:6544258-6545944	medial	apical	NOTEST	0.921906	0.676329		-0.446894	0	1	1	no
ENSORLG00000001427	ENSORLG00000001427	-	chr13:3732545-3737439	medial	apical	NOTEST	1.20858	0.480759		-1.32993	0	1	1	no
ENSORLG00000001428	ENSORLG00000001428	tmem35	chr10:10226410-10229187	medial	apical	OK	17.7061	14.1911		-0.319256	-0.689699	0.2331	0.661824	no
ENSORLG00000001430	ENSORLG00000001430	-	chr15:6586363-6589585	medial	apical	OK	19.6801	19.867		0.0136372	0.0261052	0.97365	0.991222	no
ENSORLG00000001434	ENSORLG00000001434	ddx56	chr12:2384162-2416122	medial	apical	OK	32.4765	29.6054		-0.133533	-0.368348	0.5185	0.864682	no
ENSORLG00000001435	ENSORLG00000001435	taldo1	chr3:10494279-10508989	medial	apical	OK	6.04936	6.68543		0.144237	0.272704	0.63465	0.914529	no
ENSORLG00000001436	ENSORLG00000001436	-	chr2:10969536-10987375	medial	apical	NOTEST	0	0		0	0	1	1	no
ENSORLG00000001437	ENSORLG00000001437	alkbh3	chr6:8256927-8269901	medial	apical	NOTEST	0.255014	0		#NAME?	0	1	1	no
ENSORLG00000001442	ENSORLG00000001442	-	chr6:8291714-8313650	medial	apical	OK	5.85087	6.57052		0.167355	0.444208	0.44075	0.823907	no
ENSORLG00000001443	ENSORLG00000001443	prkcda	chr5:3788497-3811873	medial	apical	NOTEST	0.237096	0.0622006		-1.93047	0	1	1	no
ENSORLG00000001444	ENSORLG00000001444	ttc7a	chr15:6595113-6707668	medial	apical	OK	9.88243	10.5871		0.0993718	0.286934	0.6103	0.906754	no
ENSORLG00000001445	ENSORLG00000001445	akt3b	chr1:4079689-4095079	medial	apical	NOTEST	1.11022	2.71175		1.28838	0	1	1	no
ENSORLG00000001446	ENSORLG00000001446	-	chr12:2426131-2429847	medial	apical	NOTEST	0.161269	0		#NAME?	0	1	1	no
ENSORLG00000001447	ENSORLG00000001447	aacs	chr9:4223048-4515552	medial	apical	OK	4.733	3.75662		-0.33332	-0.271805	0.62435	0.910932	no
ENSORLG00000001448	ENSORLG00000001448	hspa4a	chr14:6671370-6682929	medial	apical	NOTEST	0	0		0	0	1	1	no
ENSORLG00000001449	ENSORLG00000001449	eif3d	chr8:3035385-3052120	medial	apical	OK	112.612	110.316		-0.0297086	-0.102204	0.85935	0.968002	no
ENSORLG00000001450	ENSORLG00000001450	cenpi	chr10:10229488-10244458	medial	apical	OK	5.98799	6.7881		0.180936	0.384069	0.50165	0.855529	no
ENSORLG00000001451	ENSORLG00000001451	CKMT1A	chr6:8315754-8334573	medial	apical	NOTEST	0.0622097	0		#NAME?	0	1	1	no
ENSORLG00000001453	ENSORLG00000001453	-	chr5:3817016-3852073	medial	apical	NOTEST	0.100878	0.108391		0.103632	0	1	1	no
ENSORLG00000001455	ENSORLG00000001455	iqcb1	chr2:10991044-11006718	medial	apical	NOTEST	0	0		0	0	1	1	no
ENSORLG00000001457	ENSORLG00000001457	si:ch73-233k15.2 (1 of many)	chr8:3100246-3107207	medial	apical	OK	35.1349	39.554		0.170921	0.534835	0.3411	0.763544	no
ENSORLG00000001459	ENSORLG00000001459	olgc7	chr11:4650760-4693987	medial	apical	OK	19.9914	19.2591		-0.0538427	-0.151395	0.79365	0.955563	no
ENSORLG00000001460	ENSORLG00000001460	sin3ab	chr3:10524027-10539775	medial	apical	NOTEST	0.0270417	0.107651		1.9931	0	1	1	no
ENSORLG00000001462	ENSORLG00000001462	zmp:0000000524	chr14:6684419-6689873	medial	apical	NOTEST	0	0		0	0	1	1	no
ENSORLG00000001463	ENSORLG00000001463	eml2	chr13:3914166-3947820	medial	apical	NOTEST	0.024718	0.120251		2.28241	0	1	1	no
ENSORLG00000001464	ENSORLG00000001464	zmiz2 (1 of many)	chr12:2434421-2451485	medial	apical	NOTEST	0.0805757	0.0866394		0.104677	0	1	1	no
ENSORLG00000001465	ENSORLG00000001465	si:dkey-215k6.1	chr9:4223048-4515552	medial	apical	OK	17.5887	12.4239		-0.501536	-1.42362	0.013	0.146844	no
ENSORLG00000001466	ENSORLG00000001466	osbpl1a	chr4:3158855-3187679	medial	apical	OK	6.74107	6.72396		-0.003667	-0.00793384	0.99025	0.995829	no
ENSORLG00000001467	ENSORLG00000001467	crabp1b	chr3:10539795-10550659	medial	apical	NOTEST	0	0		0	0	1	1	no
ENSORLG00000001469	ENSORLG00000001469	-	chr15:6730109-6774607	medial	apical	NOTEST	0.720956	1.70642		1.24299	0	1	1	no
ENSORLG00000001470	ENSORLG00000001470	rpl3	chr8:3255488-3259727	medial	apical	NOTEST	0.037508	0		#NAME?	0	1	1	no
ENSORLG00000001471	ENSORLG00000001471	endou2	chr14:6695401-6699361	medial	apical	NOTEST	0	0		0	0	1	1	no
ENSORLG00000001472	ENSORLG00000001472	pus10	chr1:4098536-4104192	medial	apical	NOTEST	1.54181	0.754999		-1.03008	0	1	1	no
ENSORLG00000001474	ENSORLG00000001474	slc25a44b	chr3:10551195-10557411	medial	apical	NOTEST	0	0		0	0	1	1	no
ENSORLG00000001475	ENSORLG00000001475	pdia3	chr6:8337328-8351179	medial	apical	NOTEST	0.408578	0.0655024		-2.64099	0	1	1	no
ENSORLG00000001476	ENSORLG00000001476	ccdc174	chr5:3862293-3870661	medial	apical	NOTEST	0.148081	0.20743		0.486233	0	1	1	no
ENSORLG00000001478	ENSORLG00000001478	drp2	chr10:10359805-10529086	medial	apical	OK	12.8984	12.3366		-0.0642529	-0.186821	0.74485	0.944726	no
ENSORLG00000001479	ENSORLG00000001479	ndfip1l	chr14:6702171-6709239	medial	apical	NOTEST	0	0		0	0	1	1	no
ENSORLG00000001481	ENSORLG00000001481	krt18a.1	chr7:3580846-3594083	medial	apical	OK	6.17681	5.84972		-0.0784944	-0.181785	0.7484	0.946218	no
ENSORLG00000001483	ENSORLG00000001483	-	chr12:2504411-2509132	medial	apical	OK	29.5648	31.8028		0.105273	0.237723	0.67655	0.925838	no
ENSORLG00000001484	ENSORLG00000001484	-	chr2:11037726-11051750	medial	apical	NOTEST	0	0		0	0	1	1	no
ENSORLG00000001485	ENSORLG00000001485	tatdn2	chr5:3872566-3887982	medial	apical	OK	3.82632	5.78446		0.596224	1.09303	0.0587	0.366371	no
ENSORLG00000001486	ENSORLG00000001486	PSMA4	chr3:10557476-10562027	medial	apical	NOTEST	0.177061	0.0776508		-1.18917	0	1	1	no
ENSORLG00000001487	ENSORLG00000001487	rlbp1b	chr6:8353542-8358497	medial	apical	NOTEST	0.0618386	0		#NAME?	0	1	1	no
ENSORLG00000001488	ENSORLG00000001488	cts12	chr4:3218344-3226181	medial	apical	NOTEST	0	0		0	0	1	1	no
ENSORLG00000001490	ENSORLG00000001490	spry4	chr14:6765215-6766352	medial	apical	NOTEST	0	0		0	0	1	1	no
ENSORLG00000001491	ENSORLG00000001491	krt18a.2	chr7:3580846-3594083	medial	apical	OK	3.62866	4.20427		0.212419	0.276883	0.631	0.914136	no
ENSORLG00000001494	ENSORLG00000001494	nft-vtr	chr5:3899907-3903114	medial	apical	OK	4.06751	4.59256		0.175151	0.329389	0.5591	0.879486	no
ENSORLG00000001495	ENSORLG00000001495	denr	chr12:2514005-2518311	medial	apical	NOTEST	0.870208	0.626994		-0.472909	0	1	1	no
ENSORLG00000001496	ENSORLG00000001496	ankrd29	chr4:3218344-3226181	medial	apical	NOTEST	0.181075	0.554649		1.61499	0	1	1	no
ENSORLG00000001497	ENSORLG00000001497	plekhh2	chr15:6775063-6819367	medial	apical	NOTEST	0	0		0	0	1	1	no
ENSORLG00000001498	ENSORLG00000001498	abhd2b	chr6:8358535-8368978	medial	apical	NOTEST	0	0		0	0	1	1	no
ENSORLG00000001499	ENSORLG00000001499	-	chr14:6816967-6822051	medial	apical	NOTEST	0	0		0	0	1	1	no
ENSORLG00000001500	ENSORLG00000001500	slc25a39	chr8:3260985-3267326	medial	apical	NOTEST	0	0		0	0	1	1	no
ENSORLG00000001501	ENSORLG00000001501	aipl2	chr10:10359805-10529086	medial	apical	OK	3.73077	3.32784		-0.164888	-0.112002	0.8489	0.967199	no
ENSORLG00000001502	ENSORLG00000001502	ints3	chr11:4694992-4707313	medial	apical	OK	19.7343	26.582		0.429739	1.31365	0.02335	0.215467	no
ENSORLG00000001503	ENSORLG00000001503	pak4	chr13:3963541-4003320	medial	apical	OK	20.3498	17.2088		-0.241864	-0.587646	0.3049	0.738905	no
ENSORLG00000001504	ENSORLG00000001504	jak2b	chr9:4788231-4837301	medial	apical	NOTEST	0.295839	0.429679		0.538447	0	1	1	no
ENSORLG00000001505	ENSORLG00000001505	tns2a	chr7:3625816-3680280	medial	apical	NOTEST	0.405562	0.344969		-0.233454	0	1	1	no
ENSORLG00000001508	ENSORLG00000001508	cpeb1b	chr3:10608350-10619941	medial	apical	NOTEST	0.106269	0		#NAME?	0	1	1	no
ENSORLG00000001509	ENSORLG00000001509	crbn	chr5:3912505-3959551	medial	apical	NOTEST	0.465812	0.275923		-0.755485	0	1	1	no
ENSORLG00000001511	ENSORLG00000001511	cct4	chr1:4105170-4119157	medial	apical	NOTEST	2.6424	2.91533		0.141811	0	1	1	no
ENSORLG00000001512	ENSORLG00000001512	bco1l	chr2:11083089-11091834	medial	apical	NOTEST	0	0		0	0	1	1	no
ENSORLG00000001513	ENSORLG00000001513	-	chr3:10620469-10627330	medial	apical	NOTEST	0.0789367	0.081813		0.051634	0	1	1	no
ENSORLG00000001514	ENSORLG00000001514	zgc:114041	chr9:4788231-4837301	medial	apical	NOTEST	1.72839	2.06035		0.253465	0	1	1	no
ENSORLG00000001515	ENSORLG00000001515	thada	chr15:6820039-6827271	medial	apical	NOTEST	0	0		0	0	1	1	no
ENSORLG00000001516	ENSORLG00000001516	ccdc9	chr13:4016732-4036366	medial	apical	OK	90.797	88.3446		-0.0395019	-0.139363	0.8023	0.95637	no
ENSORLG00000001517	ENSORLG00000001517	-	chr4:3227419-3237316	medial	apical	NOTEST	0.217159	0		#NAME?	0	1	1	no
ENSORLG00000001518	ENSORLG00000001518	si:dkey-27c15.3	chr11:4710967-4726656	medial	apical	NOTEST	0.399551	0.35201		-0.18276	0	1	1	no
ENSORLG00000001519	ENSORLG00000001519	tmem106c	chr7:3682889-3688894	medial	apical	NOTEST	0.534116	0.608601		0.188343	0	1	1	no
ENSORLG00000001520	ENSORLG00000001520	erbb3a	chr5:3912505-3959551	medial	apical	NOTEST	2.44188	3.03981		0.315993	0	1	1	no
ENSORLG00000001523	ENSORLG00000001523	taf7	chr10:10359805-10529086	medial	apical	NOTEST	0	0		0	0	1	1	no
ENSORLG00000001524	ENSORLG00000001524	grna	chr8:3267781-3283487	medial	apical	NOTEST	0	0.036688		inf	0	1	1	no
ENSORLG00000001525	ENSORLG00000001525	eif5b	chr2:11092829-11109112	medial	apical	NOTEST	0	0		0	0	1	1	no
ENSORLG00000001527	ENSORLG00000001527	-	chr7:3689999-3693276	medial	apical	NOTEST	0.676345	0		#NAME?	0	1	1	no
ENSORLG00000001528	ENSORLG00000001528	fam161a	chr1:4105170-4119157	medial	apical	NOTEST	2.53528	1.52839		-0.730134	0	1	1	no
ENSORLG00000001529	ENSORLG00000001529	mfge8b	chr6:8373344-8405844	medial	apical	OK	75.6438	81.6884		0.11091	0.335222	0.54695	0.87306	no
ENSORLG00000001530	ENSORLG00000001530	-	chr15:7274668-7281634	medial	apical	NOTEST	0	0		0	0	1	1	no
ENSORLG00000001532	ENSORLG00000001532	si:dkey-151m15.5	chr8:3283588-3290269	medial	apical	NOTEST	0	0.0358428		inf	0	1	1	no
ENSORLG00000001533	ENSORLG00000001533	lipt1	chr2:11110409-11113090	medial	apical	NOTEST	0	0		0	0	1	1	no
ENSORLG00000001534	ENSORLG00000001534	fkbp11	chr5:3990872-4016711	medial	apical	NOTEST	0.321787	0.0675072		-2.25299	0	1	1	no
ENSORLG00000001535	ENSORLG00000001535	-	chr15:7295856-7309704	medial	apical	NOTEST	0.209006	0		#NAME?	0	1	1	no
ENSORLG00000001536	ENSORLG00000001536	csnk1g1	chr3:10628947-10661600	medial	apical	OK	3.96808	4.52225		0.1886	0.42226	0.44935	0.826811	no
ENSORLG00000001538	ENSORLG00000001538	sae1	chr13:4069714-4091016	medial	apical	OK	22.5361	20.9646		-0.104284	-0.140295	0.81265	0.957626	no
ENSORLG00000001539	ENSORLG00000001539	rpl27	chr8:3290387-3293750	medial	apical	NOTEST	0	0.147142		inf	0	1	1	no
ENSORLG00000001540	ENSORLG00000001540	hapln3	chr6:8412583-8419994	medial	apical	OK	9.27375	9.28297		0.00143362	0.00375843	0.9922	0.996358	no
ENSORLG00000001541	ENSORLG00000001541	rps26	chr5:3990872-4016711	medial	apical	NOTEST	0	0		0	0	1	1	no
ENSORLG00000001542	ENSORLG00000001542	zgc:154093	chr13:4133241-4134069	medial	apical	OK	274.424	287.247		0.0658841	0.216195	0.69985	0.930807	no
ENSORLG00000001544	ENSORLG00000001544	hip1ra	chr12:2542978-2547309	medial	apical	NOTEST	0	0		0	0	1	1	no
ENSORLG00000001545	ENSORLG00000001545	sh3yl1	chr2:11144534-11159989	medial	apical	NOTEST	0	0		0	0	1	1	no
ENSORLG00000001546	ENSORLG00000001546	ing5a	chr4:3238100-3250465	medial	apical	NOTEST	0.374552	0.661541		0.820666	0	1	1	no
ENSORLG00000001547	ENSORLG00000001547	sars	chr7:3694172-3705660	medial	apical	NOTEST	0.397941	0.371074		-0.100848	0	1	1	no
ENSORLG00000001548	ENSORLG00000001548	zgc:100906	chr11:4726985-4731810	medial	apical	NOTEST	0.171343	0.218035		0.34767	0	1	1	no
ENSORLG00000001549	ENSORLG00000001549	slc9a6a	chr10:10529944-10546390	medial	apical	NOTEST	0.119075	0.146422		0.298268	0	1	1	no
ENSORLG00000001550	ENSORLG00000001550	cep19	chr4:3238100-3250465	medial	apical	NOTEST	0	0		0	0	1	1	no
ENSORLG00000001551	ENSORLG00000001551	acanb	chr6:8422300-8436902	medial	apical	OK	35.2271	38.3615		0.122972	0.411206	0.47475	0.841972	no
ENSORLG00000001552	ENSORLG00000001552	ARHGAP26	chr14:6831593-6906764	medial	apical	NOTEST	0	0		0	0	1	1	no
ENSORLG00000001553	ENSORLG00000001553	RILPL1	chr12:2550607-2569479	medial	apical	NOTEST	0	0		0	0	1	1	no
ENSORLG00000001554	ENSORLG00000001554	fbxo3	chr2:11234047-11242364	medial	apical	NOTEST	0	0		0	0	1	1	no
ENSORLG00000001555	ENSORLG00000001555	ikzf4	chr5:3990872-4016711	medial	apical	NOTEST	0.0183128	0		#NAME?	0	1	1	no
ENSORLG00000001556	ENSORLG00000001556	gldc	chr9:4837722-4856916	medial	apical	NOTEST	0.932839	1.21724		0.383911	0	1	1	no
ENSORLG00000001557	ENSORLG00000001557	si:ch211-207e14.4	chr7:3707233-3740866	medial	apical	NOTEST	0.0679563	0		#NAME?	0	1	1	no
ENSORLG00000001558	ENSORLG00000001558	kmt5aa	chr12:2576491-2582984	medial	apical	NOTEST	0.084892	0.280015		1.7218	0	1	1	no
ENSORLG00000001559	ENSORLG00000001559	xpo1a	chr1:4124451-4142164	medial	apical	NOTEST	0.7216	0.931625		0.36855	0	1	1	no
ENSORLG00000001560	ENSORLG00000001560	-	chr2:11245011-11253935	medial	apical	NOTEST	0	0		0	0	1	1	no
ENSORLG00000001561	ENSORLG00000001561	coq2	chr9:4863719-4873774	medial	apical	NOTEST	0.587384	0.0729196		-3.00992	0	1	1	no
ENSORLG00000001562	ENSORLG00000001562	pak2b	chr4:3255899-3263824	medial	apical	NOTEST	0	0		0	0	1	1	no
ENSORLG00000001563	ENSORLG00000001563	FHL1	chr10:10547563-10563574	medial	apical	NOTEST	0.0166966	0		#NAME?	0	1	1	no
ENSORLG00000001565	ENSORLG00000001565	nr3c1	chr14:6908193-6959089	medial	apical	NOTEST	0.0663489	0.0828705		0.320786	0	1	1	no
ENSORLG00000001566	ENSORLG00000001566	rhebl1	chr5:4019575-4029855	medial	apical	NOTEST	0.0414125	0		#NAME?	0	1	1	no
ENSORLG00000001567	ENSORLG00000001567	snx1b	chr3:10669038-10677054	medial	apical	OK	18.2552	15.6223		-0.224699	-0.430377	0.44815	0.826061	no
ENSORLG00000001568	ENSORLG00000001568	rpp21	chr4:3265180-3267215	medial	apical	NOTEST	0	0		0	0	1	1	no
ENSORLG00000001570	ENSORLG00000001570	ercc2	chr13:4135783-4143809	medial	apical	OK	13.9278	15.7043		0.173187	0.441939	0.43935	0.823907	no
ENSORLG00000001572	ENSORLG00000001572	aqp12	chr4:3268456-3271862	medial	apical	NOTEST	0.473159	0		#NAME?	0	1	1	no
ENSORLG00000001573	ENSORLG00000001573	bcat2	chr8:3294309-3310285	medial	apical	NOTEST	0.0442238	0.0159665		-1.46977	0	1	1	no
ENSORLG00000001574	ENSORLG00000001574	slc35d1a	chr4:3274800-3279347	medial	apical	NOTEST	0.171061	0		#NAME?	0	1	1	no
ENSORLG00000001575	ENSORLG00000001575	ppip5k1b	chr6:8457973-8504182	medial	apical	OK	4.26941	3.12127		-0.451906	-0.863486	0.13995	0.539473	no
ENSORLG00000001576	ENSORLG00000001576	yipf5	chr14:7002904-7008160	medial	apical	NOTEST	0	0		0	0	1	1	no
ENSORLG00000001577	ENSORLG00000001577	papolg	chr15:7312021-7335632	medial	apical	NOTEST	0.0336295	0		#NAME?	0	1	1	no
ENSORLG00000001578	ENSORLG00000001578	fam50a	chr7:3707233-3740866	medial	apical	NOTEST	0.0590953	0		#NAME?	0	1	1	no
ENSORLG00000001579	ENSORLG00000001579	si:ch211-121a2.4	chr4:3281888-3286233	medial	apical	NOTEST	0.761339	1.01479		0.414569	0	1	1	no
ENSORLG00000001580	ENSORLG00000001580	kctd16b	chr14:7022060-7116357	medial	apical	NOTEST	0	0		0	0	1	1	no
ENSORLG00000001581	ENSORLG00000001581	klc3	chr13:4147233-4155047	medial	apical	OK	44.8843	44.3171		-0.0183451	-0.0517875	0.92815	0.982228	no
ENSORLG00000001583	ENSORLG00000001583	hsd17b14	chr8:3294309-3310285	medial	apical	NOTEST	0.404772	0.0813302		-2.31525	0	1	1	no
ENSORLG00000001585	ENSORLG00000001585	mfsd10	chr9:4886246-4901851	medial	apical	OK	18.1579	19.1313		0.0753402	0.235764	0.6819	0.928197	no
ENSORLG00000001586	ENSORLG00000001586	REL	chr15:7336691-7352023	medial	apical	NOTEST	0	0		0	0	1	1	no
ENSORLG00000001587	ENSORLG00000001587	kcna7	chr8:3314186-3351324	medial	apical	NOTEST	0.0237333	0		#NAME?	0	1	1	no
ENSORLG00000001588	ENSORLG00000001588	GRXCR2	chr14:7228607-7235316	medial	apical	OK	7.51308	7.96689		0.0846123	0.142248	0.80275	0.95637	no
ENSORLG00000001589	ENSORLG00000001589	ccdc84	chr9:4886246-4901851	medial	apical	NOTEST	0	0.269685		inf	0	1	1	no
ENSORLG00000001592	ENSORLG00000001592	-	chr9:4886246-4901851	medial	apical	NOTEST	0.399517	0.591615		0.566401	0	1	1	no
ENSORLG00000001593	ENSORLG00000001593	sbno1	chr12:2586655-2597837	medial	apical	NOTEST	0.117033	0.085831		-0.447346	0	1	1	no
ENSORLG00000001595	ENSORLG00000001595	atp11c	chr10:10586158-10646193	medial	apical	NOTEST	0.281106	0.592773		1.07636	0	1	1	no
ENSORLG00000001596	ENSORLG00000001596	neo1b	chr3:10684453-10901991	medial	apical	OK	5.9257	6.16971		0.0582167	0.154521	0.78195	0.953706	no
ENSORLG00000001597	ENSORLG00000001597	pex13	chr15:7362997-7365294	medial	apical	NOTEST	0	0		0	0	1	1	no
ENSORLG00000001598	ENSORLG00000001598	arhgap4b	chr7:3748940-3788579	medial	apical	NOTEST	0.767284	0.735255		-0.0615158	0	1	1	no
ENSORLG00000001599	ENSORLG00000001599	slc1a9	chr8:3314186-3351324	medial	apical	NOTEST	0	0.06044		inf	0	1	1	no
ENSORLG00000001600	ENSORLG00000001600	cct3	chr11:4731858-4743135	medial	apical	NOTEST	0.231894	0.12653		-0.873989	0	1	1	no
ENSORLG00000001602	ENSORLG00000001602	dhcr24	chr4:3286345-3295624	medial	apical	NOTEST	1.26633	0.812595		-0.640043	0	1	1	no
ENSORLG00000001603	ENSORLG00000001603	tars	chr9:5043217-5064392	medial	apical	NOTEST	0.416891	0.366648		-0.185277	0	1	1	no
ENSORLG00000001605	ENSORLG00000001605	USP34	chr1:4165058-4191246	medial	apical	NOTEST	0	0		0	0	1	1	no
ENSORLG00000001606	ENSORLG00000001606	prkag1	chr5:4034352-4038943	medial	apical	NOTEST	0	0		0	0	1	1	no
ENSORLG00000001611	ENSORLG00000001611	si:dkey-31m14.7	chr13:4158796-4244867	medial	apical	OK	93.2207	78.279		-0.252025	-0.598606	0.2943	0.727023	no
ENSORLG00000001612	ENSORLG00000001612	-	chr4:3299446-3301254	medial	apical	OK	25.2612	11.2823		-1.16286	-1.65159	0.00765	0.10265	no
ENSORLG00000001613	ENSORLG00000001613	zgc:103759	chr7:3788728-3793168	medial	apical	NOTEST	0.422455	0		#NAME?	0	1	1	no
ENSORLG00000001614	ENSORLG00000001614	glmp	chr11:4731858-4743135	medial	apical	NOTEST	0.22823	0		#NAME?	0	1	1	no
ENSORLG00000001615	ENSORLG00000001615	-	chr13:4158796-4244867	medial	apical	OK	118.101	79.9652		-0.562583	-1.07916	0.062	0.37548	no
ENSORLG00000001616	ENSORLG00000001616	mpi	chr6:8653731-8662245	medial	apical	OK	42.2088	44.6507		0.0811398	0.195813	0.7284	0.940689	no
ENSORLG00000001618	ENSORLG00000001618	b4galnt1b	chr5:4095982-4114824	medial	apical	NOTEST	0.106763	0		#NAME?	0	1	1	no
ENSORLG00000001619	ENSORLG00000001619	bbs4	chr3:10995659-11010153	medial	apical	NOTEST	0.333703	0.584716		0.809172	0	1	1	no
ENSORLG00000001620	ENSORLG00000001620	-	chr1:4337379-4340330	medial	apical	OK	3.63152	5.13492		0.49977	0.634196	0.2519	0.680277	no
ENSORLG00000001621	ENSORLG00000001621	si:dkey-84j12.1	chr9:5120537-5202717	medial	apical	OK	15.578	19.9081		0.353846	0.693077	0.23175	0.660664	no
ENSORLG00000001622	ENSORLG00000001622	larsb	chr14:7273224-7293911	medial	apical	OK	3.61737	5.7841		0.677149	1.36473	0.0193	0.187316	no
ENSORLG00000001623	ENSORLG00000001623	mcf2a	chr10:10646677-10673573	medial	apical	OK	6.02079	7.84836		0.382437	1.05951	0.0604	0.368779	no
ENSORLG00000001624	ENSORLG00000001624	-	chr2:11260495-11275143	medial	apical	NOTEST	0	0		0	0	1	1	no
ENSORLG00000001625	ENSORLG00000001625	si:ch211-189k9.2	chr15:7366858-7397793	medial	apical	NOTEST	0	0		0	0	1	1	no
ENSORLG00000001627	ENSORLG00000001627	pcsk9	chr4:3314810-3323965	medial	apical	NOTEST	0.723645	0.837163		0.210227	0	1	1	no
ENSORLG00000001628	ENSORLG00000001628	-	chr2:11275534-11285910	medial	apical	NOTEST	0	0		0	0	1	1	no
ENSORLG00000001629	ENSORLG00000001629	ARHGDIA	chr1:4344740-4372628	medial	apical	NOTEST	1.92362	1.93272		0.00680798	0	1	1	no
ENSORLG00000001630	ENSORLG00000001630	scamp2l	chr3:11010187-11019978	medial	apical	OK	2.66811	4.41758		0.727437	1.19614	0.0387	0.282152	no
ENSORLG00000001633	ENSORLG00000001633	gss	chr7:3799688-3811169	medial	apical	OK	4.32046	11.0495	15.37	1.35473	2.46952	5e-05	0.00225489	yes
ENSORLG00000001634	ENSORLG00000001634	FGF13	chr10:10683397-10782095	medial	apical	OK	14.5379	16.7711		0.206153	0.435998	0.41765	0.812805	no
ENSORLG00000001636	ENSORLG00000001636	-	chr11:4760815-4784632	medial	apical	NOTEST	0.367808	0.175729		-1.0656	0	1	1	no
ENSORLG00000001637	ENSORLG00000001637	mccc2	chr9:5120537-5202717	medial	apical	NOTEST	2.81485	2.46377		-0.192191	0	1	1	no
ENSORLG00000001638	ENSORLG00000001638	PITPNM2 (1 of many)	chr12:2657773-2700883	medial	apical	OK	3.3998	6.78435	10.1841	0.996759	2.12434	0.0004	0.012367	yes
ENSORLG00000001640	ENSORLG00000001640	os9	chr5:4126790-4139556	medial	apical	NOTEST	0.0300459	0.0676978		1.17194	0	1	1	no
ENSORLG00000001641	ENSORLG00000001641	zic6	chr10:10895936-10899053	medial	apical	NOTEST	1.90902	3.3408		0.807356	0	1	1	no
ENSORLG00000001642	ENSORLG00000001642	-	chr15:7366858-7397793	medial	apical	NOTEST	0.0253217	0.0168246		-0.589807	0	1	1	no
ENSORLG00000001643	ENSORLG00000001643	-	chr5:4142891-4151687	medial	apical	NOTEST	0	0		0	0	1	1	no
ENSORLG00000001644	ENSORLG00000001644	-	chr8:3355665-3381077	medial	apical	NOTEST	0.0300716	0.147192		2.29122	0	1	1	no
ENSORLG00000001645	ENSORLG00000001645	rbm27	chr14:7294374-7313605	medial	apical	OK	5.27742	4.26114		-0.308592	-0.611456	0.2806	0.712707	no
ENSORLG00000001646	ENSORLG00000001646	apof	chr5:4156751-4158170	medial	apical	NOTEST	0	0		0	0	1	1	no
ENSORLG00000001647	ENSORLG00000001647	lrp12	chr11:4799378-4808419	medial	apical	OK	28.4826	29.3792		0.0447116	0.129761	0.81725	0.958063	no
ENSORLG00000001648	ENSORLG00000001648	-	chr1:4400923-4463426	medial	apical	OK	7.61074	7.88096		0.0503351	0.0399599	0.9443	0.983473	no
ENSORLG00000001649	ENSORLG00000001649	pcgf6	chr15:7406918-7416677	medial	apical	NOTEST	0.0205195	0.0971438		2.24313	0	1	1	no
ENSORLG00000001650	ENSORLG00000001650	cybb	chr2:11386754-11417435	medial	apical	NOTEST	0	0		0	0	1	1	no
ENSORLG00000001652	ENSORLG00000001652	wdyhv1	chr11:4810676-4814866	medial	apical	NOTEST	0.297875	0.177589		-0.746167	0	1	1	no
ENSORLG00000001653	ENSORLG00000001653	pim1	chr7:3839643-3843197	medial	apical	OK	42.5794	34.6712		-0.29642	-0.909023	0.10675	0.48788	no
ENSORLG00000001654	ENSORLG00000001654	zic3	chr10:10905802-10908167	medial	apical	OK	67.0322	57.7425		-0.21522	-0.630443	0.26965	0.705301	no
ENSORLG00000001656	ENSORLG00000001656	dynlt3	chr2:11419583-11422055	medial	apical	NOTEST	0	0		0	0	1	1	no
ENSORLG00000001657	ENSORLG00000001657	pou4f3	chr14:7315062-7318328	medial	apical	NOTEST	0.374115	0.384915		0.0410595	0	1	1	no
ENSORLG00000001658	ENSORLG00000001658	c1ql4b	chr5:4334843-4362218	medial	apical	NOTEST	0.457782	0.681375		0.57379	0	1	1	no
ENSORLG00000001659	ENSORLG00000001659	gpr101	chr10:10974061-10975279	medial	apical	NOTEST	0.0687244	0.975684		3.82752	0	1	1	no
ENSORLG00000001660	ENSORLG00000001660	si:dkey-8e10.3	chr7:3976383-3986281	medial	apical	NOTEST	0	0		0	0	1	1	no
ENSORLG00000001661	ENSORLG00000001661	-	chr2:11437883-11441868	medial	apical	NOTEST	0	0		0	0	1	1	no
ENSORLG00000001662	ENSORLG00000001662	-	chr15:7418766-7426731	medial	apical	NOTEST	0	0		0	0	1	1	no
ENSORLG00000001663	ENSORLG00000001663	nhej1	chr2:11442345-11474959	medial	apical	NOTEST	0	0		0	0	1	1	no
ENSORLG00000001664	ENSORLG00000001664	-	chr9:5219795-5259128	medial	apical	NOTEST	0	0		0	0	1	1	no
ENSORLG00000001666	ENSORLG00000001666	ihhb	chr2:11477554-11491264	medial	apical	NOTEST	0	0		0	0	1	1	no
ENSORLG00000001674	ENSORLG00000001674	bop1	chr11:4817030-4826306	medial	apical	NOTEST	0.288075	0.902374		1.64728	0	1	1	no
ENSORLG00000001675	ENSORLG00000001675	ppp1r27b	chr1:4487282-4506240	medial	apical	NOTEST	0	0		0	0	1	1	no
ENSORLG00000001676	ENSORLG00000001676	vrk2	chr15:7749865-7806002	medial	apical	OK	2.42859	4.27866		0.817042	1.64614	0.0051	0.079454	no
ENSORLG00000001677	ENSORLG00000001677	myo9aa	chr3:11026764-11113319	medial	apical	NOTEST	1.88573	2.20681		0.226846	0	1	1	no
ENSORLG00000001678	ENSORLG00000001678	rad50	chr14:7347256-7377496	medial	apical	NOTEST	0.180272	0		#NAME?	0	1	1	no
ENSORLG00000001679	ENSORLG00000001679	tm9sf5	chr10:10978685-10993135	medial	apical	NOTEST	0	0		0	0	1	1	no
ENSORLG00000001680	ENSORLG00000001680	bin1b	chr2:11491486-11517384	medial	apical	NOTEST	0	0		0	0	1	1	no
ENSORLG00000001681	ENSORLG00000001681	drd1b	chr14:7414994-7418017	medial	apical	NOTEST	0	0		0	0	1	1	no
ENSORLG00000001682	ENSORLG00000001682	myo9ab	chr6:8711839-8749843	medial	apical	OK	4.16997	2.85051		-0.548818	-1.02584	0.07645	0.414225	no
ENSORLG00000001683	ENSORLG00000001683	USP24	chr4:3326460-3354288	medial	apical	OK	9.05056	6.9183		-0.387588	-1.09539	0.05945	0.367092	no
ENSORLG00000001684	ENSORLG00000001684	senp8	chr3:11132771-11133437	medial	apical	NOTEST	0	0		0	0	1	1	no
ENSORLG00000001685	ENSORLG00000001685	usp19	chr7:4236006-4269857	medial	apical	OK	6.97552	7.10893		0.027332	0.0640589	0.9105	0.980407	no
ENSORLG00000001687	ENSORLG00000001687	psat1	chr9:5291504-5298449	medial	apical	NOTEST	0.92122	0		#NAME?	0	1	1	no
ENSORLG00000001689	ENSORLG00000001689	si:ch73-262h23.4	chr13:4260221-4298096	medial	apical	NOTEST	1.01105	0.859845		-0.233706	0	1	1	no
ENSORLG00000001690	ENSORLG00000001690	gramd2aa	chr3:11141526-11171667	medial	apical	OK	52.3679	57.654		0.138739	0.44711	0.4356	0.821805	no
ENSORLG00000001692	ENSORLG00000001692	rbmx	chr10:10995266-11003028	medial	apical	NOTEST	0	0		0	0	1	1	no
ENSORLG00000001693	ENSORLG00000001693	oaz2a	chr6:8846766-8849209	medial	apical	NOTEST	0	0		0	0	1	1	no
ENSORLG00000001694	ENSORLG00000001694	-	chr9:5301651-5307706	medial	apical	OK	27.413	26.1023		-0.0706818	-0.16429	0.76945	0.951776	no
ENSORLG00000001695	ENSORLG00000001695	fancl	chr15:7749865-7806002	medial	apical	NOTEST	0.315771	2.19541		2.79754	0	1	1	no
ENSORLG00000001696	ENSORLG00000001696	bloc1s2	chr4:3362930-3365650	medial	apical	NOTEST	0.176681	0.561439		1.66798	0	1	1	no
ENSORLG00000001697	ENSORLG00000001697	-	chr12:2707784-2722703	medial	apical	NOTEST	0.0576434	0		#NAME?	0	1	1	no
ENSORLG00000001698	ENSORLG00000001698	p4hb	chr1:4487282-4506240	medial	apical	NOTEST	0.0553947	0.109592		0.984316	0	1	1	no
ENSORLG00000001699	ENSORLG00000001699	HSF1	chr11:4829211-4852558	medial	apical	NOTEST	0.430566	0.996831		1.21111	0	1	1	no
ENSORLG00000001700	ENSORLG00000001700	znf609b	chr3:11171822-11239161	medial	apical	NOTEST	0.413313	0.785479		0.926337	0	1	1	no
ENSORLG00000001701	ENSORLG00000001701	dnpep	chr2:11522765-11572922	medial	apical	NOTEST	0	0		0	0	1	1	no
ENSORLG00000001704	ENSORLG00000001704	bcl11aa	chr15:8554577-8609964	medial	apical	NOTEST	0	0		0	0	1	1	no
ENSORLG00000001705	ENSORLG00000001705	-	chr2:11522765-11572922	medial	apical	NOTEST	0	0		0	0	1	1	no
ENSORLG00000001706	ENSORLG00000001706	ppib	chr6:8887586-8894831	medial	apical	NOTEST	0	0		0	0	1	1	no
ENSORLG00000001707	ENSORLG00000001707	-	chr1:4511130-4536641	medial	apical	NOTEST	0.60916	0.493752		-0.303033	0	1	1	no
ENSORLG00000001708	ENSORLG00000001708	rnmt	chr11:4907267-4913477	medial	apical	NOTEST	0.104102	0.0827014		-0.332019	0	1	1	no
ENSORLG00000001709	ENSORLG00000001709	lamb2l	chr7:4317799-4376635	medial	apical	OK	35.5774	31.7637		-0.163583	-0.551099	0.33615	0.761615	no
ENSORLG00000001710	ENSORLG00000001710	trip4	chr3:11289426-11402363	medial	apical	OK	11.4297	9.76119		-0.227664	-0.503318	0.3844	0.792858	no
ENSORLG00000001711	ENSORLG00000001711	CPEB4 (1 of many)	chr14:7642567-7676284	medial	apical	OK	6.17224	6.5667		0.0893759	0.240868	0.6797	0.928197	no
ENSORLG00000001713	ENSORLG00000001713	pfkmb	chr5:4412962-4424276	medial	apical	OK	9.06186	8.7961		-0.0429444	-0.0915251	0.8695	0.970074	no
ENSORLG00000001714	ENSORLG00000001714	-	chr9:5319510-5326523	medial	apical	OK	35.2107	39.5366		0.167174	0.483768	0.39225	0.796689	no
ENSORLG00000001715	ENSORLG00000001715	-	chr11:4948099-4950597	medial	apical	OK	36.0244	35.2532		-0.0312215	-0.077557	0.8933	0.975658	no
ENSORLG00000001716	ENSORLG00000001716	adpgk	chr6:8896582-8908484	medial	apical	NOTEST	0.130534	0.0858691		-0.60421	0	1	1	no
ENSORLG00000001719	ENSORLG00000001719	adad2	chr14:7729817-7739236	medial	apical	NOTEST	0	0		0	0	1	1	no
ENSORLG00000001720	ENSORLG00000001720	cln6a	chr3:11403201-11466051	medial	apical	NOTEST	0.246704	0.283856		0.202375	0	1	1	no
ENSORLG00000001723	ENSORLG00000001723	DDRGK1	chr2:11588252-11593328	medial	apical	NOTEST	0	0		0	0	1	1	no
ENSORLG00000001724	ENSORLG00000001724	ext1b	chr11:5171365-5303166	medial	apical	NOTEST	1.24218	2.15406		0.794191	0	1	1	no
ENSORLG00000001725	ENSORLG00000001725	snx22	chr6:8912571-8923618	medial	apical	NOTEST	0	0		0	0	1	1	no
ENSORLG00000001727	ENSORLG00000001727	adgrg4b	chr14:7739394-7743725	medial	apical	OK	18.48	28.5043		0.625217	1.46549	0.0111	0.13289	no
ENSORLG00000001728	ENSORLG00000001728	kcnk6	chr13:4364676-4379678	medial	apical	NOTEST	0.158722	0		#NAME?	0	1	1	no
ENSORLG00000001729	ENSORLG00000001729	calml4a	chr3:11482914-11487576	medial	apical	NOTEST	0.277344	0.141603		-0.969823	0	1	1	no
ENSORLG00000001731	ENSORLG00000001731	-	chr6:8971662-8991065	medial	apical	NOTEST	0.0370271	0		#NAME?	0	1	1	no
ENSORLG00000001734	ENSORLG00000001734	rptor	chr1:4537547-4723134	medial	apical	NOTEST	0.367352	0.556081		0.598133	0	1	1	no
ENSORLG00000001735	ENSORLG00000001735	-	chr12:2748163-2781103	medial	apical	OK	4.2191	5.39544		0.354806	0.726287	0.19885	0.622629	no
ENSORLG00000001737	ENSORLG00000001737	-	chr6:9045031-9045694	medial	apical	OK	1.40358	4.77216		1.76553	1.19727	0.2003	0.623096	no
ENSORLG00000001738	ENSORLG00000001738	arhgef6	chr10:11003190-11032196	medial	apical	NOTEST	0.30559	0.459227		0.587608	0	1	1	no
ENSORLG00000001739	ENSORLG00000001739	nucb1	chr8:3393862-3399036	medial	apical	OK	7.4162	7.26279		-0.0301552	-0.0591042	0.9118	0.980407	no
ENSORLG00000001740	ENSORLG00000001740	mthfd2l	chr9:5343477-5367923	medial	apical	OK	7.62622	11.1283		0.545197	0.60848	0.28655	0.71971	no
ENSORLG00000001741	ENSORLG00000001741	fhl1b	chr14:7757009-7791813	medial	apical	NOTEST	1.60193	1.80581		0.172836	0	1	1	no
ENSORLG00000001742	ENSORLG00000001742	prkaa2	chr4:3532604-3542911	medial	apical	OK	8.79936	8.87467		0.0122951	0.0246322	0.9697	0.990339	no
ENSORLG00000001743	ENSORLG00000001743	-	chr3:11493991-11699602	medial	apical	OK	5.974	4.3754		-0.449282	-1.22994	0.03365	0.264664	no
ENSORLG00000001744	ENSORLG00000001744	cd40lg	chr10:11035281-11036673	medial	apical	NOTEST	0.135813	0		#NAME?	0	1	1	no
ENSORLG00000001746	ENSORLG00000001746	cat	chr6:9052025-9062863	medial	apical	NOTEST	0.350614	0.665805		0.925217	0	1	1	no
ENSORLG00000001748	ENSORLG00000001748	rims1a	chr15:8658576-8749535	medial	apical	NOTEST	0	0		0	0	1	1	no
ENSORLG00000001749	ENSORLG00000001749	-	chr2:11598761-11687201	medial	apical	NOTEST	0	0		0	0	1	1	no
ENSORLG00000001750	ENSORLG00000001750	si:rp71-17i16.5	chr7:4388120-4402731	medial	apical	OK	30.1275	30.0986		-0.00138568	-0.00433366	0.99635	0.996849	no
ENSORLG00000001751	ENSORLG00000001751	espl1	chr5:4426567-4453391	medial	apical	OK	32.6313	33.1395		0.0222946	0.0761697	0.89645	0.976786	no
ENSORLG00000001753	ENSORLG00000001753	tmtops3a	chr10:11038638-11049303	medial	apical	NOTEST	0.0752152	0.366794		2.28587	0	1	1	no
ENSORLG00000001755	ENSORLG00000001755	-	chr9:5371210-5376765	medial	apical	OK	12.8622	13.15		0.0319274	0.0569236	0.91285	0.980407	no
ENSORLG00000001756	ENSORLG00000001756	NPTX1	chr1:4734550-4737155	medial	apical	NOTEST	0	0.198942		inf	0	1	1	no
ENSORLG00000001758	ENSORLG00000001758	-	chr10:11056788-11061392	medial	apical	NOTEST	0.269079	1.65166		2.61781	0	1	1	no
ENSORLG00000001759	ENSORLG00000001759	-	chr9:5379507-5389490	medial	apical	NOTEST	0.527897	0.140308		-1.91166	0	1	1	no
ENSORLG00000001761	ENSORLG00000001761	si:rp71-17i16.4	chr7:4415190-4425980	medial	apical	OK	10.3092	10.4843		0.0242972	0.0537982	0.92685	0.982228	no
ENSORLG00000001762	ENSORLG00000001762	syt12	chr6:9065701-9087973	medial	apical	NOTEST	0.286216	0.0568962		-2.3307	0	1	1	no
ENSORLG00000001764	ENSORLG00000001764	-	chr13:4398513-4425977	medial	apical	NOTEST	0.276101	0.253984		-0.120462	0	1	1	no
ENSORLG00000001766	ENSORLG00000001766	areg	chr9:5396616-5401175	medial	apical	NOTEST	2.2214	1.24132		-0.839596	0	1	1	no
ENSORLG00000001767	ENSORLG00000001767	si:ch211-152f23.5	chr8:3399449-3401584	medial	apical	OK	10.7713	11.1693		0.0523536	0.112616	0.84845	0.967199	no
ENSORLG00000001768	ENSORLG00000001768	adgrg4a	chr10:11062190-11079241	medial	apical	NOTEST	0.211024	0.166404		-0.342719	0	1	1	no
ENSORLG00000001771	ENSORLG00000001771	birc6	chr15:9736068-9791498	medial	apical	OK	16.0462	29.8163	45.8625	0.893872	2.96337	5e-05	0.00225489	yes
ENSORLG00000001776	ENSORLG00000001776	-	chr13:1092776-1098928	medial	apical	NOTEST	0.0356372	0		#NAME?	0	1	1	no
ENSORLG00000001777	ENSORLG00000001777	mat2al	chr12:2801861-2813689	medial	apical	OK	6.79803	4.89888		-0.472666	-0.770958	0.1812	0.601438	no
ENSORLG00000001780	ENSORLG00000001780	sox2	chr10:11175944-11177698	medial	apical	NOTEST	0	0		0	0	1	1	no
ENSORLG00000001781	ENSORLG00000001781	pfdn5	chr5:4453406-4458821	medial	apical	OK	15.0904	15.6558		0.0530689	0.136035	0.81585	0.957626	no
ENSORLG00000001782	ENSORLG00000001782	yipf4	chr15:9793710-9798291	medial	apical	NOTEST	0.40306	0		#NAME?	0	1	1	no
ENSORLG00000001783	ENSORLG00000001783	-	chr2:11690694-11700407	medial	apical	NOTEST	0	0		0	0	1	1	no
ENSORLG00000001784	ENSORLG00000001784	utp23	chr11:5389767-5392769	medial	apical	NOTEST	0	0		0	0	1	1	no
ENSORLG00000001785	ENSORLG00000001785	P2RY4	chr10:11195030-11196122	medial	apical	NOTEST	0	0		0	0	1	1	no
ENSORLG00000001786	ENSORLG00000001786	dab1a	chr4:3554996-3650084	medial	apical	NOTEST	0.0544624	0		#NAME?	0	1	1	no
ENSORLG00000001787	ENSORLG00000001787	slc35f2l	chr13:4479573-4488140	medial	apical	OK	4.37212	4.14572		-0.0767113	-0.102639	0.85955	0.968002	no
ENSORLG00000001788	ENSORLG00000001788	slc9a6b	chr14:7757009-7791813	medial	apical	OK	73.0538	70.7184		-0.0468732	-0.127319	0.82135	0.960005	no
ENSORLG00000001790	ENSORLG00000001790	-	chr9:5409574-5413964	medial	apical	OK	15.5285	12.9357		-0.263555	-0.534603	0.34805	0.765618	no
ENSORLG00000001791	ENSORLG00000001791	exo1	chr15:9809642-9816533	medial	apical	NOTEST	0	0.218407		inf	0	1	1	no
ENSORLG00000001793	ENSORLG00000001793	-	chr2:8220505-8529304	medial	apical	NOTEST	0	0		0	0	1	1	no
ENSORLG00000001794	ENSORLG00000001794	hmg20a	chr6:9208468-9219586	medial	apical	NOTEST	0.873968	1.21219		0.471967	0	1	1	no
ENSORLG00000001795	ENSORLG00000001795	-	chr14:7793095-7801854	medial	apical	OK	85.0786	89.896		0.079461	0.275115	0.63395	0.914486	no
ENSORLG00000001796	ENSORLG00000001796	-	chr2:6577688-6665825	medial	apical	NOTEST	0.435367	0.190932		-1.18917	0	1	1	no
ENSORLG00000001797	ENSORLG00000001797	tnnc2	chr7:4415190-4425980	medial	apical	NOTEST	0	1.23698		inf	0	1	1	no
ENSORLG00000001798	ENSORLG00000001798	frs3	chr5:4485985-4497891	medial	apical	NOTEST	0.0734655	0		#NAME?	0	1	1	no
ENSORLG00000001800	ENSORLG00000001800	itga11a	chr3:11704702-11764775	medial	apical	NOTEST	0.0908516	0.220169		1.27703	0	1	1	no
ENSORLG00000001801	ENSORLG00000001801	-	chr15:9845620-9850188	medial	apical	OK	33.4272	39.1538		0.228129	0.732152	0.20195	0.625024	no
ENSORLG00000001803	ENSORLG00000001803	lingo1a	chr6:9644967-9842287	medial	apical	NOTEST	0.433128	0.39703		-0.125546	0	1	1	no
ENSORLG00000001805	ENSORLG00000001805	RNF5	chr11:5393621-5400853	medial	apical	NOTEST	0.0952512	0.126778		0.412493	0	1	1	no
ENSORLG00000001806	ENSORLG00000001806	inppl1b	chr10:11202772-11220305	medial	apical	NOTEST	1.01551	0.651455		-0.640462	0	1	1	no
ENSORLG00000001809	ENSORLG00000001809	-	chr2:11759895-11779605	medial	apical	NOTEST	0	0		0	0	1	1	no
ENSORLG00000001811	ENSORLG00000001811	clns1a	chr13:4489427-4493502	medial	apical	OK	48.915	56.1834		0.199867	0.4258	0.45	0.826811	no
ENSORLG00000001812	ENSORLG00000001812	snx12	chr14:7801924-7806853	medial	apical	OK	75.6923	70.2857		-0.106915	-0.239726	0.6806	0.928197	no
ENSORLG00000001813	ENSORLG00000001813	cox4i2	chr7:4431227-4497288	medial	apical	NOTEST	0.864997	1.58076		0.869849	0	1	1	no
ENSORLG00000001816	ENSORLG00000001816	pdzd8	chr15:9889472-9928159	medial	apical	NOTEST	0.0377451	0.288765		2.93553	0	1	1	no
ENSORLG00000001818	ENSORLG00000001818	slc6a11a (1 of many)	chr5:4551289-4573491	medial	apical	NOTEST	0.348729	0.309573		-0.171824	0	1	1	no
ENSORLG00000001819	ENSORLG00000001819	cspg4	chr6:10217960-10305754	medial	apical	NOTEST	0.994576	0.888658		-0.162453	0	1	1	no
ENSORLG00000001820	ENSORLG00000001820	rasal3	chr1:4823920-4835902	medial	apical	OK	27.1089	19.0317		-0.510361	-1.49951	0.0096	0.119462	no
ENSORLG00000001822	ENSORLG00000001822	trim25	chr1:4838315-4846031	medial	apical	NOTEST	0	0		0	0	1	1	no
ENSORLG00000001823	ENSORLG00000001823	tbc1d17	chr8:3405057-3411948	medial	apical	NOTEST	3.52823	2.44659		-0.528172	0	1	1	no
ENSORLG00000001824	ENSORLG00000001824	snx33	chr6:10335461-10356113	medial	apical	OK	12.2366	9.84599		-0.313597	-0.728389	0.2	0.623096	no
ENSORLG00000001826	ENSORLG00000001826	-	chr1:4849093-4849759	medial	apical	NOTEST	0	0		0	0	1	1	no
ENSORLG00000001828	ENSORLG00000001828	slc20a2	chr9:5422715-5458922	medial	apical	OK	1460.67	1173.04		-0.316378	-1.0948	0.0575	0.361515	no
ENSORLG00000001830	ENSORLG00000001830	ARR3	chr10:11229807-11235839	medial	apical	NOTEST	0.265519	0		#NAME?	0	1	1	no
ENSORLG00000001831	ENSORLG00000001831	-	chr22:27034385-27043454	medial	apical	NOTEST	0.419723	0		#NAME?	0	1	1	no
ENSORLG00000001832	ENSORLG00000001832	-	chr8:3413535-3418443	medial	apical	NOTEST	0.109191	0.324106		1.56961	0	1	1	no
ENSORLG00000001833	ENSORLG00000001833	hnrnpd	chr12:2822353-2828660	medial	apical	NOTEST	0.415918	0.73971		0.830662	0	1	1	no
ENSORLG00000001835	ENSORLG00000001835	-	chr2:9823214-9840881	medial	apical	NOTEST	0	0		0	0	1	1	no
ENSORLG00000001836	ENSORLG00000001836	snupn	chr6:10356316-10371419	medial	apical	OK	5.05473	4.2416		-0.253027	-0.568292	0.322	0.752377	no
ENSORLG00000001837	ENSORLG00000001837	slc18a2	chr15:9934084-9967730	medial	apical	NOTEST	3.55198	1.61579		-1.13639	0	1	1	no
ENSORLG00000001839	ENSORLG00000001839	dgke	chr1:4861921-4872796	medial	apical	OK	9.21626	6.34786		-0.537912	-1.01711	0.0726	0.402826	no
ENSORLG00000001840	ENSORLG00000001840	-	chr9:5464987-5474337	medial	apical	OK	9.81984	10.5562		0.104323	0.222419	0.68155	0.928197	no
ENSORLG00000001841	ENSORLG00000001841	-	chr2:12377916-12407601	medial	apical	NOTEST	0	0		0	0	1	1	no
ENSORLG00000001842	ENSORLG00000001842	emc10	chr8:3434945-3651489	medial	apical	NOTEST	0.0987019	0		#NAME?	0	1	1	no
ENSORLG00000001843	ENSORLG00000001843	slc7a3a	chr14:7809396-7837636	medial	apical	NOTEST	2.13216	1.52127		-0.487038	0	1	1	no
ENSORLG00000001844	ENSORLG00000001844	si:dkey-31g6.6	chr1:4861921-4872796	medial	apical	NOTEST	0	0		0	0	1	1	no
ENSORLG00000001846	ENSORLG00000001846	enoph1	chr12:2828876-2839170	medial	apical	NOTEST	0.214572	0.693664		1.69278	0	1	1	no
ENSORLG00000001847	ENSORLG00000001847	CORO2B	chr3:11834331-11872534	medial	apical	NOTEST	0	0		0	0	1	1	no
ENSORLG00000001848	ENSORLG00000001848	-	chr2:12424105-12428048	medial	apical	NOTEST	0	0		0	0	1	1	no
ENSORLG00000001849	ENSORLG00000001849	ptpn9a	chr6:10373003-10397289	medial	apical	NOTEST	1.68199	2.12076		0.334407	0	1	1	no
ENSORLG00000001850	ENSORLG00000001850	RAB39B	chr14:7809396-7837636	medial	apical	OK	12.4924	18.7491		0.58577	0.627791	0.23635	0.665865	no
ENSORLG00000001854	ENSORLG00000001854	-	chr2:12434014-12449099	medial	apical	NOTEST	0	0		0	0	1	1	no
ENSORLG00000001855	ENSORLG00000001855	arfgef2	chr7:4431227-4497288	medial	apical	OK	21.1627	17.2641		-0.293749	-0.888779	0.12125	0.513237	no
ENSORLG00000001857	ENSORLG00000001857	rab38c	chr14:7809396-7837636	medial	apical	NOTEST	0	0		0	0	1	1	no
ENSORLG00000001859	ENSORLG00000001859	slc6a11a (1 of many)	chr5:4583694-4591722	medial	apical	NOTEST	0.528899	0.239009		-1.14593	0	1	1	no
ENSORLG00000001860	ENSORLG00000001860	pak1	chr13:4500151-4558980	medial	apical	NOTEST	0.136011	0.213755		0.652231	0	1	1	no
ENSORLG00000001861	ENSORLG00000001861	pard6b	chr7:4497308-4518177	medial	apical	OK	167.785	118.613		-0.500355	-1.29472	0.0241	0.220018	no
ENSORLG00000001862	ENSORLG00000001862	stard14	chr10:11237690-11253552	medial	apical	NOTEST	0.173688	0		#NAME?	0	1	1	no
ENSORLG00000001863	ENSORLG00000001863	lipg	chr9:5475555-5480736	medial	apical	OK	4.33051	4.47064		0.0459447	0.0700879	0.9056	0.97923	no
ENSORLG00000001864	ENSORLG00000001864	adnpb	chr7:4523204-4530891	medial	apical	OK	818.49	657.753		-0.315419	-1.04679	0.06845	0.389728	no
ENSORLG00000001866	ENSORLG00000001866	si:dkey-193c22.1	chr9:5526998-5529887	medial	apical	OK	2.2292	3.96742		0.831677	0.867139	0.1331	0.529433	no
ENSORLG00000001867	ENSORLG00000001867	pdzd11	chr10:11253591-11262443	medial	apical	NOTEST	0	0.0517814		inf	0	1	1	no
ENSORLG00000001868	ENSORLG00000001868	-	chr15:10012916-10027370	medial	apical	OK	29.7967	21.5581		-0.466923	-0.884466	0.1218	0.513964	no
ENSORLG00000001869	ENSORLG00000001869	-	chr2:12452567-12505578	medial	apical	NOTEST	0	0		0	0	1	1	no
ENSORLG00000001870	ENSORLG00000001870	si:dkey-193c22.2	chr9:5531532-5560103	medial	apical	OK	4.92578	3.82127		-0.366302	-0.918605	0.11255	0.499686	no
ENSORLG00000001871	ENSORLG00000001871	anp32a	chr3:11875633-11954636	medial	apical	NOTEST	0	0		0	0	1	1	no
ENSORLG00000001872	ENSORLG00000001872	sin3aa	chr6:10408736-10422213	medial	apical	NOTEST	0.0261023	0.0250083		-0.0617698	0	1	1	no
ENSORLG00000001874	ENSORLG00000001874	sec31a	chr12:2842216-2866269	medial	apical	OK	22.2897	20.4438		-0.124718	-0.373555	0.51335	0.862003	no
ENSORLG00000001876	ENSORLG00000001876	gdpd4a	chr13:4576913-4598024	medial	apical	NOTEST	0	0		0	0	1	1	no
ENSORLG00000001877	ENSORLG00000001877	SNX18	chr9:5574790-5590677	medial	apical	OK	22.5467	21.2432		-0.0859151	-0.270332	0.63845	0.914826	no
ENSORLG00000001879	ENSORLG00000001879	arl15a	chr9:5637912-5702879	medial	apical	OK	18.0742	21.0131		0.217358	0.371631	0.5168	0.864167	no
ENSORLG00000001880	ENSORLG00000001880	dpm1	chr7:4536587-4539759	medial	apical	NOTEST	0	0		0	0	1	1	no
ENSORLG00000001881	ENSORLG00000001881	gdpd2	chr10:11267653-11282057	medial	apical	NOTEST	0.0351344	0.0607428		0.789831	0	1	1	no
ENSORLG00000001882	ENSORLG00000001882	-	chr2:12508810-12520382	medial	apical	NOTEST	0	0		0	0	1	1	no
ENSORLG00000001883	ENSORLG00000001883	glcea	chr3:11875633-11954636	medial	apical	NOTEST	0.0576959	0.0415704		-0.472912	0	1	1	no
ENSORLG00000001884	ENSORLG00000001884	card14	chr1:4994514-5012925	medial	apical	OK	45.3546	61.9903		0.450795	1.54038	0.00735	0.0995153	no
ENSORLG00000001885	ENSORLG00000001885	-	chr4:3837958-3864462	medial	apical	NOTEST	0	0		0	0	1	1	no
ENSORLG00000001886	ENSORLG00000001886	rtn4a	chr15:10058372-10062964	medial	apical	OK	3.51239	3.84051		0.128845	0.106656	0.84955	0.967236	no
ENSORLG00000001887	ENSORLG00000001887	-	chr8:3434945-3651489	medial	apical	OK	25.0023	21.413		-0.223578	-0.500695	0.37755	0.78712	no
ENSORLG00000001888	ENSORLG00000001888	cntnap3	chr17:1396344-1590740	medial	apical	NOTEST	0.226261	0.0267799		-3.07876	0	1	1	no
ENSORLG00000001889	ENSORLG00000001889	eno1b	chr5:4597313-4606581	medial	apical	OK	18.7003	14.7681		-0.340576	-0.798749	0.1631	0.569967	no
ENSORLG00000001890	ENSORLG00000001890	si:ch211-200p22.4	chr14:7844545-7864690	medial	apical	NOTEST	2.43675	3.57008		0.550997	0	1	1	no
ENSORLG00000001892	ENSORLG00000001892	fsta	chr9:5753379-5757410	medial	apical	OK	120.996	119.988		-0.012064	-0.0404085	0.94295	0.983473	no
ENSORLG00000001895	ENSORLG00000001895	rangrf	chr4:3837958-3864462	medial	apical	NOTEST	0	0		0	0	1	1	no
ENSORLG00000001896	ENSORLG00000001896	mrps9	chr2:12520494-12534364	medial	apical	NOTEST	0	0		0	0	1	1	no
ENSORLG00000001897	ENSORLG00000001897	rereb	chr5:4610101-4629434	medial	apical	OK	81.8627	76.0983		-0.105341	-0.350399	0.54345	0.87306	no
ENSORLG00000001899	ENSORLG00000001899	ccdc40	chr1:5015730-5148464	medial	apical	OK	88.6617	90.6066		0.0313046	0.0896209	0.8721	0.97017	no
ENSORLG00000001900	ENSORLG00000001900	-	chr14:7869441-7891391	medial	apical	OK	35.4881	28.8772		-0.297405	-0.408593	0.45465	0.828594	no
ENSORLG00000001901	ENSORLG00000001901	pou3f3b	chr2:12562236-12568317	medial	apical	NOTEST	0	0		0	0	1	1	no
ENSORLG00000001902	ENSORLG00000001902	vamp4	chr4:3872116-3882621	medial	apical	NOTEST	0.0351135	0		#NAME?	0	1	1	no
ENSORLG00000001903	ENSORLG00000001903	lrrc4ba	chr8:3434945-3651489	medial	apical	NOTEST	0.320852	0.0554262		-2.53327	0	1	1	no
ENSORLG00000001904	ENSORLG00000001904	wdr61	chr6:10453661-10459588	medial	apical	NOTEST	0.211435	0.164626		-0.361022	0	1	1	no
ENSORLG00000001906	ENSORLG00000001906	lin54	chr12:2871515-2885810	medial	apical	NOTEST	1.79694	2.30951		0.362043	0	1	1	no
ENSORLG00000001907	ENSORLG00000001907	slc44a4	chr11:5401234-5415559	medial	apical	NOTEST	0.10298	0.338295		1.71591	0	1	1	no
ENSORLG00000001908	ENSORLG00000001908	kbtbd12	chr5:4647922-4651149	medial	apical	NOTEST	0.0410253	0.0843814		1.04041	0	1	1	no
ENSORLG00000001910	ENSORLG00000001910	myoc	chr4:3884831-3922281	medial	apical	NOTEST	0.148006	0.101722		-0.541028	0	1	1	no
ENSORLG00000001911	ENSORLG00000001911	slc25a44a	chr6:10463208-10468029	medial	apical	NOTEST	0.271127	0		#NAME?	0	1	1	no
ENSORLG00000001912	ENSORLG00000001912	paqr5a	chr3:11955014-11974772	medial	apical	OK	3.5129	4.60453		0.390393	0.660014	0.2517	0.680277	no
ENSORLG00000001913	ENSORLG00000001913	dlg3	chr10:11282629-11368124	medial	apical	NOTEST	2.88071	1.20562		-1.25665	0	1	1	no
ENSORLG00000001914	ENSORLG00000001914	osbpl11	chr2:13038431-13067164	medial	apical	OK	4.11146	4.68037		0.18697	0.320465	0.5789	0.891461	no
ENSORLG00000001915	ENSORLG00000001915	ehmt2	chr11:5416208-5434643	medial	apical	NOTEST	1.3686	1.8938		0.468584	0	1	1	no
ENSORLG00000001916	ENSORLG00000001916	-	chr1:5015730-5148464	medial	apical	OK	12.8328	13.4119		0.0636736	0.0883969	0.87615	0.971377	no
ENSORLG00000001917	ENSORLG00000001917	slc26a6l	chr5:4652040-4679321	medial	apical	OK	6.17537	6.26317		0.0203672	0.0125107	0.982	0.993596	no
ENSORLG00000001918	ENSORLG00000001918	-	chr17:1299913-1314789	medial	apical	NOTEST	0.042545	0.0501678		0.237773	0	1	1	no
ENSORLG00000001922	ENSORLG00000001922	med25	chr8:3434945-3651489	medial	apical	NOTEST	0	0		0	0	1	1	no
ENSORLG00000001923	ENSORLG00000001923	ibtk	chr16:4287053-4318633	medial	apical	NOTEST	0.157867	0.165678		0.0696723	0	1	1	no
ENSORLG00000001924	ENSORLG00000001924	cops4	chr12:2887130-2902236	medial	apical	NOTEST	2.07658	3.41548		0.717877	0	1	1	no
ENSORLG00000001925	ENSORLG00000001925	ITGA2	chr9:5758871-5784791	medial	apical	NOTEST	0.994882	2.03527		1.03263	0	1	1	no
ENSORLG00000001926	ENSORLG00000001926	EML6	chr15:10076388-10126027	medial	apical	NOTEST	1.82396	1.13515		-0.684193	0	1	1	no
ENSORLG00000001927	ENSORLG00000001927	p4htm	chr5:4652040-4679321	medial	apical	OK	61.8561	66.3556		0.101302	0.343687	0.54755	0.873227	no
ENSORLG00000001929	ENSORLG00000001929	prrc2c	chr4:3884831-3922281	medial	apical	NOTEST	0.492245	0.382703		-0.363149	0	1	1	no
ENSORLG00000001930	ENSORLG00000001930	tpbgb	chr16:4326046-4327174	medial	apical	NOTEST	0	0.301312		inf	0	1	1	no
ENSORLG00000001933	ENSORLG00000001933	tex11	chr10:11370496-11390339	medial	apical	NOTEST	0	0		0	0	1	1	no
ENSORLG00000001934	ENSORLG00000001934	paip1	chr9:5798647-5805374	medial	apical	NOTEST	0.0414221	0.0851977		1.04041	0	1	1	no
ENSORLG00000001935	ENSORLG00000001935	syt3	chr8:3434945-3651489	medial	apical	OK	56.2601	43.424		-0.373619	-0.890914	0.1205	0.511719	no
ENSORLG00000001936	ENSORLG00000001936	ube3d	chr16:4369191-4401801	medial	apical	NOTEST	0.0218551	0.0532892		1.28587	0	1	1	no
ENSORLG00000001937	ENSORLG00000001937	si:dkeyp-117h8.2	chr4:3952367-3957927	medial	apical	NOTEST	0.39329	0.172315		-1.19054	0	1	1	no
ENSORLG00000001939	ENSORLG00000001939	gpd1c	chr2:13038431-13067164	medial	apical	NOTEST	0	0		0	0	1	1	no
ENSORLG00000001940	ENSORLG00000001940	kdrl	chr10:11397278-11441454	medial	apical	OK	2.43444	4.07747		0.744082	1.66479	0.0051	0.079454	no
ENSORLG00000001941	ENSORLG00000001941	myo7aa	chr13:4608971-4645946	medial	apical	NOTEST	0.016626	0		#NAME?	0	1	1	no
ENSORLG00000001943	ENSORLG00000001943	ireb2	chr6:10469273-10488014	medial	apical	NOTEST	1.52315	1.93573		0.345825	0	1	1	no
ENSORLG00000001944	ENSORLG00000001944	kif23 (1 of many)	chr3:11977542-12004295	medial	apical	OK	8.47732	9.30733		0.134759	0.361434	0.53155	0.867784	no
ENSORLG00000001945	ENSORLG00000001945	AXIN2	chr1:5153693-5210179	medial	apical	NOTEST	0.473471	0.226621		-1.063	0	1	1	no
ENSORLG00000001946	ENSORLG00000001946	-	chr7:4543878-4579293	medial	apical	OK	44.0416	37.9699		-0.214011	-0.581119	0.31445	0.745899	no
ENSORLG00000001947	ENSORLG00000001947	aasdh	chr4:3959962-3967934	medial	apical	NOTEST	0	0		0	0	1	1	no
ENSORLG00000001948	ENSORLG00000001948	nelfe	chr11:5436846-5493405	medial	apical	NOTEST	0.620536	0.899623		0.535805	0	1	1	no
ENSORLG00000001949	ENSORLG00000001949	EPC1	chr17:1258718-1286332	medial	apical	NOTEST	2.33558	1.71219		-0.447938	0	1	1	no
ENSORLG00000001951	ENSORLG00000001951	dpp3	chr14:7869441-7891391	medial	apical	OK	23.3136	14.5403		-0.681115	-1.72665	0.0033	0.0589089	no
ENSORLG00000001952	ENSORLG00000001952	-	chr13:4668263-4686888	medial	apical	NOTEST	0.029908	0		#NAME?	0	1	1	no
ENSORLG00000001953	ENSORLG00000001953	NCKAP5	chr2:13076343-13241956	medial	apical	NOTEST	0.538952	0.817722		0.601455	0	1	1	no
ENSORLG00000001955	ENSORLG00000001955	-	chr14:7891921-7895877	medial	apical	NOTEST	0	0		0	0	1	1	no
ENSORLG00000001957	ENSORLG00000001957	-	chr7:4580377-4590850	medial	apical	NOTEST	0.391276	0.0688666		-2.50631	0	1	1	no
ENSORLG00000001958	ENSORLG00000001958	adamts12	chr9:5823388-5845476	medial	apical	NOTEST	0.0147001	0.0228537		0.636597	0	1	1	no
ENSORLG00000001959	ENSORLG00000001959	fam222bb	chr13:4688129-4706232	medial	apical	NOTEST	0.0512282	0.0208449		-1.29724	0	1	1	no
ENSORLG00000001960	ENSORLG00000001960	si:ch211-51c14.1	chr8:3657557-3679335	medial	apical	OK	5.55797	5.83721		0.0707197	0.108288	0.84365	0.966357	no
ENSORLG00000001963	ENSORLG00000001963	cdx4	chr10:11448442-11451966	medial	apical	OK	11.0751	16.221		0.550543	1.26176	0.02975	0.247148	no
ENSORLG00000001964	ENSORLG00000001964	ACTR3	chr2:13259316-13271151	medial	apical	OK	4.17979	4.905		0.230822	0.422406	0.4613	0.834583	no
ENSORLG00000001965	ENSORLG00000001965	ppat	chr4:3968471-3989993	medial	apical	NOTEST	0.0118269	0		#NAME?	0	1	1	no
ENSORLG00000001966	ENSORLG00000001966	chic1	chr10:11452366-11458539	medial	apical	OK	5.6786	7.6959		0.438556	0.892222	0.12185	0.513964	no
ENSORLG00000001967	ENSORLG00000001967	-	chr1:5397079-5410339	medial	apical	NOTEST	0	0		0	0	1	1	no
ENSORLG00000001968	ENSORLG00000001968	COL8A1 (1 of many)	chr2:13297724-13300034	medial	apical	NOTEST	0.784388	0.656137		-0.257572	0	1	1	no
ENSORLG00000001969	ENSORLG00000001969	TLE3 (1 of many)	chr3:12138223-12169913	medial	apical	OK	52.6289	61.7711		0.231078	0.790099	0.1615	0.568806	no
ENSORLG00000001970	ENSORLG00000001970	snx1a	chr6:10489314-10501622	medial	apical	OK	4.33958	4.90039		0.175341	0.386972	0.49415	0.854199	no
ENSORLG00000001971	ENSORLG00000001971	adamts6	chr12:2920350-2991017	medial	apical	NOTEST	2.21542	2.19116		-0.0158849	0	1	1	no
ENSORLG00000001972	ENSORLG00000001972	lnx2b	chr10:11458564-11483380	medial	apical	OK	134.659	145.149		0.108231	0.383105	0.506	0.857341	no
ENSORLG00000001973	ENSORLG00000001973	-	chr2:13312290-13367194	medial	apical	NOTEST	0	0		0	0	1	1	no
ENSORLG00000001974	ENSORLG00000001974	sv2	chr6:10504167-10512309	medial	apical	OK	42.3748	46.8066		0.143506	0.3908	0.49595	0.854199	no
ENSORLG00000001975	ENSORLG00000001975	slc25a43	chr10:11497809-11503710	medial	apical	NOTEST	0	0		0	0	1	1	no
ENSORLG00000001976	ENSORLG00000001976	-	chr2:13373545-13422929	medial	apical	NOTEST	0	0		0	0	1	1	no
ENSORLG00000001977	ENSORLG00000001977	ITGB1 (1 of many)	chr17:1222975-1253785	medial	apical	NOTEST	0	0		0	0	1	1	no
ENSORLG00000001978	ENSORLG00000001978	agpat9l	chr9:5848378-5854864	medial	apical	NOTEST	0	0		0	0	1	1	no
ENSORLG00000001979	ENSORLG00000001979	paics	chr4:3968471-3989993	medial	apical	NOTEST	0	0.0438559		inf	0	1	1	no
ENSORLG00000001982	ENSORLG00000001982	flna	chr7:4625325-4670275	medial	apical	OK	11.127	11.1655		0.00498324	0.0156824	0.97845	0.992566	no
ENSORLG00000001983	ENSORLG00000001983	arr3	chr14:7960890-7991920	medial	apical	NOTEST	0	0		0	0	1	1	no
ENSORLG00000001986	ENSORLG00000001986	shank1	chr8:3685841-3736401	medial	apical	OK	7.32334	6.80289		-0.106354	-0.292811	0.60805	0.905658	no
ENSORLG00000001987	ENSORLG00000001987	-	chr13:4817206-4869734	medial	apical	NOTEST	0	0		0	0	1	1	no
ENSORLG00000001989	ENSORLG00000001989	exosc9	chr1:5410858-5414987	medial	apical	NOTEST	0	0		0	0	1	1	no
ENSORLG00000001990	ENSORLG00000001990	mrpl11	chr10:11534005-11598100	medial	apical	NOTEST	0.449624	1.63809		1.86522	0	1	1	no
ENSORLG00000001991	ENSORLG00000001991	cwc27	chr12:3002991-3048006	medial	apical	OK	2.99564	7.30359		1.28574	0.990139	0.0926	0.450458	no
ENSORLG00000001992	ENSORLG00000001992	uacab	chr3:12326358-12384371	medial	apical	OK	15.285	14.6322		-0.0629727	-0.197551	0.7317	0.941183	no
ENSORLG00000001993	ENSORLG00000001993	myl7	chr9:5858989-5871774	medial	apical	NOTEST	0	0		0	0	1	1	no
ENSORLG00000001995	ENSORLG00000001995	MRPL49	chr7:4701214-4712360	medial	apical	OK	103.979	216.795		1.06004	1.27234	0.03745	0.280081	no
ENSORLG00000001996	ENSORLG00000001996	prox1b	chr2:13608413-13647209	medial	apical	NOTEST	0.0773444	0.0650812		-0.249055	0	1	1	no
ENSORLG00000001998	ENSORLG00000001998	-	chr4:3991706-4001325	medial	apical	NOTEST	0	0		0	0	1	1	no
ENSORLG00000001999	ENSORLG00000001999	npas4a	chr10:11599798-11605345	medial	apical	NOTEST	0.0637328	0.0379957		-0.746199	0	1	1	no
ENSORLG00000002001	ENSORLG00000002001	-	chr16:4408073-4435072	medial	apical	NOTEST	0	0		0	0	1	1	no
ENSORLG00000002002	ENSORLG00000002002	ppwd1	chr12:3048546-3052330	medial	apical	OK	27.6892	27.6428		-0.00241887	-0.00661677	0.9935	0.996358	no
ENSORLG00000002003	ENSORLG00000002003	nrl	chr4:4001350-4008483	medial	apical	NOTEST	0	0		0	0	1	1	no
ENSORLG00000002004	ENSORLG00000002004	hif1al	chr13:4886574-4985940	medial	apical	NOTEST	0.666301	0.606968		-0.134554	0	1	1	no
ENSORLG00000002005	ENSORLG00000002005	NRP1 (1 of many)	chr17:1142610-1217295	medial	apical	NOTEST	0.173653	0.179385		0.0468517	0	1	1	no
ENSORLG00000002006	ENSORLG00000002006	SPTBN1	chr15:10140655-10204785	medial	apical	NOTEST	0.596878	0.204815		-1.54311	0	1	1	no
ENSORLG00000002007	ENSORLG00000002007	efemp2a	chr10:11627188-11650050	medial	apical	NOTEST	0.107145	0.144245		0.428955	0	1	1	no
ENSORLG00000002008	ENSORLG00000002008	ppp1caa	chr8:3791284-3802148	medial	apical	OK	3.93954	4.50633		0.193925	0.388762	0.49845	0.854199	no
ENSORLG00000002009	ENSORLG00000002009	haus7	chr7:4701214-4712360	medial	apical	OK	118.066	116.779		-0.0158188	-0.0436216	0.93875	0.983473	no
ENSORLG00000002010	ENSORLG00000002010	gck	chr9:5858989-5871774	medial	apical	OK	7.17969	4.15688		-0.788422	-1.54668	0.00655	0.0944397	no
ENSORLG00000002011	ENSORLG00000002011	clgn	chr1:5415696-5460589	medial	apical	NOTEST	0.616418	0.72533		0.234728	0	1	1	no
ENSORLG00000002013	ENSORLG00000002013	cldni	chr8:3809786-3815712	medial	apical	NOTEST	0	0		0	0	1	1	no
ENSORLG00000002014	ENSORLG00000002014	las1l	chr7:4701214-4712360	medial	apical	OK	7.23071	7.42838		0.0389118	0.0310087	0.96045	0.987619	no
ENSORLG00000002015	ENSORLG00000002015	scoca	chr1:5415696-5460589	medial	apical	NOTEST	0	0		0	0	1	1	no
ENSORLG00000002016	ENSORLG00000002016	trim23	chr12:3054199-3066197	medial	apical	NOTEST	0.927361	0.9326		0.00812751	0	1	1	no
ENSORLG00000002018	ENSORLG00000002018	-	chr15:10272305-10275670	medial	apical	NOTEST	2.40345	2.24396		-0.0990587	0	1	1	no
ENSORLG00000002019	ENSORLG00000002019	-	chr17:9462139-9464872	medial	apical	NOTEST	0	0		0	0	1	1	no
ENSORLG00000002020	ENSORLG00000002020	-	chr4:4021686-4058017	medial	apical	NOTEST	0.448953	0.255167		-0.815125	0	1	1	no
ENSORLG00000002021	ENSORLG00000002021	skiv2l	chr11:5436846-5493405	medial	apical	OK	3.5885	4.32812		0.27036	0.233704	0.67535	0.925445	no
ENSORLG00000002023	ENSORLG00000002023	AP3B2	chr6:10513487-10584471	medial	apical	OK	21.5087	27.9888		0.379929	1.18505	0.03895	0.282152	no
ENSORLG00000002024	ENSORLG00000002024	-	chr4:4077971-4079260	medial	apical	NOTEST	0	0		0	0	1	1	no
ENSORLG00000002026	ENSORLG00000002026	mcf2b	chr14:7960890-7991920	medial	apical	NOTEST	0	0.0519804		inf	0	1	1	no
ENSORLG00000002027	ENSORLG00000002027	-	chr4:4118511-4125437	medial	apical	NOTEST	0.148022	0.304454		1.04041	0	1	1	no
ENSORLG00000002028	ENSORLG00000002028	ykt6	chr9:5873060-5879350	medial	apical	NOTEST	0.025331	0		#NAME?	0	1	1	no
ENSORLG00000002030	ENSORLG00000002030	mzt2b	chr12:3054199-3066197	medial	apical	NOTEST	2.67544	1.1969		-1.16047	0	1	1	no
ENSORLG00000002031	ENSORLG00000002031	-	chr4:4081545-4084926	medial	apical	NOTEST	0	0		0	0	1	1	no
ENSORLG00000002032	ENSORLG00000002032	fibpa	chr10:11627188-11650050	medial	apical	NOTEST	0	0		0	0	1	1	no
ENSORLG00000002034	ENSORLG00000002034	prrt1	chr11:5436846-5493405	medial	apical	OK	100.405	99.9053		-0.00719266	-0.0205709	0.9732	0.991096	no
ENSORLG00000002035	ENSORLG00000002035	ccdc85b	chr10:11653696-11659718	medial	apical	NOTEST	0	0		0	0	1	1	no
ENSORLG00000002036	ENSORLG00000002036	cyp26c1	chr15:10393937-10403343	medial	apical	NOTEST	0.104414	0		#NAME?	0	1	1	no
ENSORLG00000002037	ENSORLG00000002037	-	chr6:10598688-10600299	medial	apical	NOTEST	0.115446	0		#NAME?	0	1	1	no
ENSORLG00000002038	ENSORLG00000002038	cul5a	chr13:4886574-4985940	medial	apical	OK	41.0586	42.4694		0.0487396	0.15177	0.786	0.955365	no
ENSORLG00000002039	ENSORLG00000002039	-	chr9:5884420-5895631	medial	apical	NOTEST	0.0158764	0		#NAME?	0	1	1	no
ENSORLG00000002041	ENSORLG00000002041	dtymk	chr4:4141164-4152324	medial	apical	NOTEST	0.115254	0		#NAME?	0	1	1	no
ENSORLG00000002042	ENSORLG00000002042	atp2b3b	chr7:4720312-4772090	medial	apical	OK	48.2389	50.6112		0.0692611	0.234973	0.6762	0.925781	no
ENSORLG00000002043	ENSORLG00000002043	-	chr11:5436846-5493405	medial	apical	NOTEST	1.88342	1.23691		-0.606621	0	1	1	no
ENSORLG00000002044	ENSORLG00000002044	lhx5	chr12:3168874-3188090	medial	apical	NOTEST	0.556756	0.264735		-1.0725	0	1	1	no
ENSORLG00000002046	ENSORLG00000002046	coro1a	chr8:3809786-3815712	medial	apical	NOTEST	0	0		0	0	1	1	no
ENSORLG00000002047	ENSORLG00000002047	-	chr2:13742684-13756775	medial	apical	NOTEST	1.17022	2.37889		1.02351	0	1	1	no
ENSORLG00000002048	ENSORLG00000002048	-	chr3:12384391-12410031	medial	apical	NOTEST	0.286912	1.12086		1.96593	0	1	1	no
ENSORLG00000002049	ENSORLG00000002049	si:dkeyp-87d8.8	chr12:3232713-3234018	medial	apical	OK	16.1242	20.7284		0.362379	0.807407	0.16225	0.569441	no
ENSORLG00000002051	ENSORLG00000002051	-	chr15:10489655-10511552	medial	apical	NOTEST	0.0371511	0.0453895		0.288954	0	1	1	no
ENSORLG00000002052	ENSORLG00000002052	ccnq	chr7:4784818-4812152	medial	apical	NOTEST	2.50591	3.22285		0.363004	0	1	1	no
ENSORLG00000002054	ENSORLG00000002054	rxfp3.3a3	chr3:12418828-12423216	medial	apical	NOTEST	2.16145	1.58911		-0.443782	0	1	1	no
ENSORLG00000002055	ENSORLG00000002055	bmt2	chr6:10655120-10665310	medial	apical	OK	181.031	100.052	281.083	-0.855487	-2.85423	5e-05	0.00225489	yes
ENSORLG00000002056	ENSORLG00000002056	dcun1d5	chr13:4886574-4985940	medial	apical	NOTEST	2.88454	3.20569		0.152296	0	1	1	no
ENSORLG00000002057	ENSORLG00000002057	neu1	chr11:5495722-5503325	medial	apical	NOTEST	0.0511299	0.0674076		0.398745	0	1	1	no
ENSORLG00000002060	ENSORLG00000002060	hmgcrb	chr12:3246022-3257856	medial	apical	NOTEST	1.35594	1.16509		-0.218852	0	1	1	no
ENSORLG00000002061	ENSORLG00000002061	fgf13b	chr14:7993912-8021302	medial	apical	NOTEST	0.77961	0.291231		-1.42059	0	1	1	no
ENSORLG00000002062	ENSORLG00000002062	-	chr8:3837669-3872550	medial	apical	OK	109.051	113.448		0.0570219	0.190171	0.7378	0.943365	no
ENSORLG00000002063	ENSORLG00000002063	NAA15	chr1:5608773-5620471	medial	apical	NOTEST	0.13569	0.0845203		-0.682945	0	1	1	no
ENSORLG00000002065	ENSORLG00000002065	yif1a	chr10:11661602-11673960	medial	apical	NOTEST	0.137458	0.0961352		-0.515854	0	1	1	no
ENSORLG00000002066	ENSORLG00000002066	tmem168b	chr6:10665688-10668404	medial	apical	OK	55.1517	8.61604	63.7677	-2.67831	-6.5493	5e-05	0.00225489	yes
ENSORLG00000002067	ENSORLG00000002067	-	chr8:3872660-3879922	medial	apical	OK	9.02322	10.9276		0.276257	0.586715	0.308	0.742638	no
ENSORLG00000002068	ENSORLG00000002068	si:ch211-145o7.3	chr10:11661602-11673960	medial	apical	NOTEST	0.115597	0.0980916		-0.2369	0	1	1	no
ENSORLG00000002069	ENSORLG00000002069	-	chr16:4438583-4464345	medial	apical	NOTEST	0	0		0	0	1	1	no
ENSORLG00000002071	ENSORLG00000002071	-	chr1:5626777-5630215	medial	apical	NOTEST	0	0		0	0	1	1	no
ENSORLG00000002072	ENSORLG00000002072	prrc2a	chr11:5504147-5522507	medial	apical	NOTEST	0.0212747	0		#NAME?	0	1	1	no
ENSORLG00000002073	ENSORLG00000002073	slc22a15	chr15:10515558-10585820	medial	apical	NOTEST	0	0		0	0	1	1	no
ENSORLG00000002076	ENSORLG00000002076	kif11	chr15:10604274-10624819	medial	apical	NOTEST	0.614165	0.114264		-2.42625	0	1	1	no
ENSORLG00000002077	ENSORLG00000002077	pias1a	chr3:12429683-12504584	medial	apical	OK	5.0293	4.43242		-0.182264	-0.313234	0.5688	0.885226	no
ENSORLG00000002078	ENSORLG00000002078	ptdss2	chr6:10671610-10689971	medial	apical	OK	85.3967	106.674		0.320958	0.984654	0.0858	0.435388	no
ENSORLG00000002080	ENSORLG00000002080	csnk2b	chr11:5525436-5531553	medial	apical	NOTEST	0.0513816	0		#NAME?	0	1	1	no
ENSORLG00000002081	ENSORLG00000002081	capn5a	chr13:4886574-4985940	medial	apical	NOTEST	1.23045	1.78013		0.532802	0	1	1	no
ENSORLG00000002083	ENSORLG00000002083	-	chr3:12510400-12524513	medial	apical	NOTEST	0	0.0567355		inf	0	1	1	no
ENSORLG00000002084	ENSORLG00000002084	prss35	chr16:4486106-4487378	medial	apical	NOTEST	0	0		0	0	1	1	no
ENSORLG00000002085	ENSORLG00000002085	cdkn1cb	chr6:10704341-10707257	medial	apical	OK	177.511	165.959		-0.097085	-0.335157	0.5626	0.881681	no
ENSORLG00000002087	ENSORLG00000002087	ap4b1	chr7:4812334-4829793	medial	apical	NOTEST	1.92388	2.39464		0.315794	0	1	1	no
ENSORLG00000002088	ENSORLG00000002088	-	chr15:10690050-10696311	medial	apical	NOTEST	0	0		0	0	1	1	no
ENSORLG00000002089	ENSORLG00000002089	-	chr8:3901610-3912143	medial	apical	NOTEST	2.88076	0.0586654		-5.61779	0	1	1	no
ENSORLG00000002091	ENSORLG00000002091	elf2b	chr1:5652221-5675189	medial	apical	NOTEST	0.300827	0		#NAME?	0	1	1	no
ENSORLG00000002092	ENSORLG00000002092	atl3	chr10:11681734-11694718	medial	apical	NOTEST	0.33195	0.553775		0.738336	0	1	1	no
ENSORLG00000002095	ENSORLG00000002095	utp15	chr9:5946119-5954618	medial	apical	OK	3.30907	4.41259		0.415198	0.728028	0.20325	0.628075	no
ENSORLG00000002098	ENSORLG00000002098	atg4b	chr4:4152782-4163792	medial	apical	NOTEST	0	0.252113		inf	0	1	1	no
ENSORLG00000002099	ENSORLG00000002099	sephs2	chr7:4830910-4840220	medial	apical	NOTEST	1.77459	1.58497		-0.163027	0	1	1	no
ENSORLG00000002100	ENSORLG00000002100	noctb	chr1:5679142-5682867	medial	apical	NOTEST	0.951194	0.10257		-3.21314	0	1	1	no
ENSORLG00000002101	ENSORLG00000002101	afap1l1b	chr14:8023052-8039999	medial	apical	NOTEST	0.199853	0.20895		0.0642203	0	1	1	no
ENSORLG00000002103	ENSORLG00000002103	cfl1	chr10:11696814-11700009	medial	apical	NOTEST	0	0		0	0	1	1	no
ENSORLG00000002104	ENSORLG00000002104	armc5	chr8:3901610-3912143	medial	apical	NOTEST	0.545664	0.0977276		-2.48118	0	1	1	no
ENSORLG00000002107	ENSORLG00000002107	-	chr6:10851026-10869300	medial	apical	NOTEST	1.18735	0.226372		-2.39098	0	1	1	no
ENSORLG00000002108	ENSORLG00000002108	slc30a6	chr15:10777560-10856148	medial	apical	NOTEST	0.457154	0.549387		0.265143	0	1	1	no
ENSORLG00000002109	ENSORLG00000002109	-	chr9:5955444-5964998	medial	apical	OK	82.3151	87.5733		0.0893336	0.292083	0.60835	0.905798	no
ENSORLG00000002110	ENSORLG00000002110	elob	chr8:3915059-3916917	medial	apical	OK	156.922	164.067		0.064232	0.213603	0.712	0.934481	no
ENSORLG00000002111	ENSORLG00000002111	-	chr11:5621519-5624336	medial	apical	NOTEST	0.555931	0		#NAME?	0	1	1	no
ENSORLG00000002112	ENSORLG00000002112	prss23	chr10:11703042-11704212	medial	apical	NOTEST	0	0		0	0	1	1	no
ENSORLG00000002115	ENSORLG00000002115	-	chr9:5955444-5964998	medial	apical	OK	8.68289	5.50358		-0.657805	-0.283875	0.6581	0.921972	no
ENSORLG00000002116	ENSORLG00000002116	slc43a3a	chr1:5693176-5734542	medial	apical	NOTEST	0	0.0871362		inf	0	1	1	no
ENSORLG00000002117	ENSORLG00000002117	-	chr13:4886574-4985940	medial	apical	NOTEST	1.48615	3.05793		1.04098	0	1	1	no
ENSORLG00000002119	ENSORLG00000002119	ikbkg	chr7:4841237-4853517	medial	apical	NOTEST	0.841254	0.847576		0.0108017	0	1	1	no
ENSORLG00000002121	ENSORLG00000002121	me1	chr16:4510150-4591301	medial	apical	NOTEST	0.0619398	0		#NAME?	0	1	1	no
ENSORLG00000002122	ENSORLG00000002122	-	chr2:24101643-24111634	medial	apical	NOTEST	1.79844	2.17996		0.277557	0	1	1	no
ENSORLG00000002125	ENSORLG00000002125	pard3ab	chr17:491117-828483	medial	apical	OK	4.08844	5.57952		0.44859	0.95246	0.0869	0.437637	no
ENSORLG00000002126	ENSORLG00000002126	v1ar2	chr6:10988891-10994320	medial	apical	OK	45.1736	50.1732		0.151438	0.509422	0.3736	0.785437	no
ENSORLG00000002127	ENSORLG00000002127	dctd	chr1:5693176-5734542	medial	apical	NOTEST	0.18178	0		#NAME?	0	1	1	no
ENSORLG00000002128	ENSORLG00000002128	zgc:162613	chr8:3926907-3933735	medial	apical	OK	9.10315	7.59008		-0.26225	-0.584035	0.31175	0.743557	no
ENSORLG00000002129	ENSORLG00000002129	prdm13	chr16:4658959-4665428	medial	apical	NOTEST	0.120101	0.109406		-0.134557	0	1	1	no
ENSORLG00000002130	ENSORLG00000002130	tmed4	chr7:4855308-4859037	medial	apical	NOTEST	1.25832	0.821872		-0.614518	0	1	1	no
ENSORLG00000002131	ENSORLG00000002131	hic2	chr9:5996775-5998530	medial	apical	NOTEST	0	0		0	0	1	1	no
ENSORLG00000002135	ENSORLG00000002135	obsl1a	chr2:13803741-13818725	medial	apical	NOTEST	0	0		0	0	1	1	no
ENSORLG00000002136	ENSORLG00000002136	-	chr18:457368-479895	medial	apical	NOTEST	0	0		0	0	1	1	no
ENSORLG00000002138	ENSORLG00000002138	thumpd2	chr15:10871372-10879435	medial	apical	OK	4.76264	4.3361		-0.135363	-0.252656	0.66385	0.9231	no
ENSORLG00000002139	ENSORLG00000002139	clic1	chr11:5634137-5657844	medial	apical	OK	225.962	232.122		0.0388004	0.110049	0.84795	0.967199	no
ENSORLG00000002140	ENSORLG00000002140	-	chr13:4987148-4998922	medial	apical	OK	3.58504	4.80366		0.422144	0.570802	0.31605	0.746444	no
ENSORLG00000002141	ENSORLG00000002141	-	chr17:436862-440544	medial	apical	NOTEST	0.0561527	0.0618988		0.140555	0	1	1	no
ENSORLG00000002143	ENSORLG00000002143	zgc:172323	chr16:4669736-4681241	medial	apical	NOTEST	0.0535779	0		#NAME?	0	1	1	no
ENSORLG00000002145	ENSORLG00000002145	-	chr11:5634137-5657844	medial	apical	OK	343.035	211.592		-0.697075	-0.438502	0.437	0.821952	no
ENSORLG00000002146	ENSORLG00000002146	ppm1h	chr6:11011336-11048752	medial	apical	OK	11.3676	11.0883		-0.0358966	-0.0906659	0.8771	0.971532	no
ENSORLG00000002147	ENSORLG00000002147	-	chr17:316234-318512	medial	apical	NOTEST	0	0		0	0	1	1	no
ENSORLG00000002148	ENSORLG00000002148	plpbp	chr7:4860831-4866189	medial	apical	OK	19.6063	17.967		-0.125969	-0.335312	0.551	0.87457	no
ENSORLG00000002149	ENSORLG00000002149	col4a3bpb	chr12:3258547-3277419	medial	apical	NOTEST	3.49781	2.58735		-0.434975	0	1	1	no
ENSORLG00000002151	ENSORLG00000002151	CTDSP1	chr2:13823259-13839348	medial	apical	NOTEST	0.112902	0		#NAME?	0	1	1	no
ENSORLG00000002153	ENSORLG00000002153	cd2bp2	chr8:3948150-3951328	medial	apical	OK	61.6397	57.39		-0.10306	-0.306668	0.58825	0.894608	no
ENSORLG00000002154	ENSORLG00000002154	farp2	chr4:4180774-4224363	medial	apical	OK	9.91613	12.2856		0.309118	0.915727	0.11105	0.495963	no
ENSORLG00000002156	ENSORLG00000002156	bckdha	chr13:5006493-5014391	medial	apical	NOTEST	2.29268	3.35946		0.551197	0	1	1	no
ENSORLG00000002157	ENSORLG00000002157	zgc:153733	chr8:3952128-3956036	medial	apical	OK	93.7265	90.0279		-0.0580845	-0.193588	0.73775	0.943365	no
ENSORLG00000002158	ENSORLG00000002158	map2k5	chr3:12540962-12599981	medial	apical	OK	3.81382	2.78304		-0.454578	-0.700921	0.2039	0.628465	no
ENSORLG00000002159	ENSORLG00000002159	ubl3b	chr10:11746287-11755252	medial	apical	NOTEST	0	0		0	0	1	1	no
ENSORLG00000002160	ENSORLG00000002160	-	chr18:20361030-20362916	medial	apical	OK	4.49303	6.86565		0.611707	1.00272	0.08055	0.424814	no
ENSORLG00000002161	ENSORLG00000002161	ddah2	chr11:5634137-5657844	medial	apical	OK	81.5472	78.266		-0.0592502	-0.117086	0.83405	0.964765	no
ENSORLG00000002162	ENSORLG00000002162	b3gnt2l	chr13:5006493-5014391	medial	apical	NOTEST	0.079444	0.000227408		-8.44851	0	1	1	no
ENSORLG00000002164	ENSORLG00000002164	cacna2d2b	chr5:4767437-4807809	medial	apical	NOTEST	0.0508904	0		#NAME?	0	1	1	no
ENSORLG00000002165	ENSORLG00000002165	-	chr1:5738794-5979825	medial	apical	NOTEST	0.066918	0.077701		0.215539	0	1	1	no
ENSORLG00000002168	ENSORLG00000002168	mylpfa	chr8:3958535-3964141	medial	apical	OK	27.012	24.414		-0.145891	-0.397517	0.49245	0.854199	no
ENSORLG00000002170	ENSORLG00000002170	usp45	chr16:4683692-4713736	medial	apical	NOTEST	0.0137355	0		#NAME?	0	1	1	no
ENSORLG00000002171	ENSORLG00000002171	-	chr17:12409941-12412250	medial	apical	NOTEST	0	0		0	0	1	1	no
ENSORLG00000002172	ENSORLG00000002172	tbc1d10b	chr8:3965844-4066104	medial	apical	OK	10.0338	8.2523		-0.282001	-0.558112	0.32995	0.758456	no
ENSORLG00000002173	ENSORLG00000002173	mon2	chr6:11054388-11097148	medial	apical	OK	7.66062	7.24901		-0.0796763	-0.232919	0.6782	0.927672	no
ENSORLG00000002175	ENSORLG00000002175	SV2C (1 of many)	chr12:3309654-3357735	medial	apical	OK	168.149	208.26		0.30865	1.08992	0.0569	0.35988	no
ENSORLG00000002176	ENSORLG00000002176	si:zfos-80g12.1	chr10:11767722-11779703	medial	apical	OK	26.9969	24.1051		-0.163457	-0.336776	0.5646	0.883274	no
ENSORLG00000002177	ENSORLG00000002177	spega	chr2:13845615-13916751	medial	apical	OK	35.8047	36.196		0.0156815	0.0541409	0.92295	0.981704	no
ENSORLG00000002178	ENSORLG00000002178	rap2c	chr10:11792314-11796960	medial	apical	NOTEST	0.3986	0.85388		1.09909	0	1	1	no
ENSORLG00000002179	ENSORLG00000002179	olgc8	chr18:457368-479895	medial	apical	NOTEST	0	0		0	0	1	1	no
ENSORLG00000002180	ENSORLG00000002180	vegfc	chr1:6564175-6646799	medial	apical	NOTEST	0.598484	0.459194		-0.382209	0	1	1	no
ENSORLG00000002183	ENSORLG00000002183	mbnl3	chr10:11806176-11820793	medial	apical	OK	34.5509	40.2142		0.218982	0.707615	0.21545	0.6426	no
ENSORLG00000002184	ENSORLG00000002184	inha	chr2:13922680-13927271	medial	apical	OK	15.3894	14.1652		-0.119585	-0.277746	0.6236	0.910651	no
ENSORLG00000002188	ENSORLG00000002188	hs6st2	chr10:11826172-11830169	medial	apical	NOTEST	0.0278138	0.0933283		1.74652	0	1	1	no
ENSORLG00000002190	ENSORLG00000002190	hsd3b7 (1 of many)	chr8:3965844-4066104	medial	apical	OK	22.436	20.9997		-0.0954432	-0.153868	0.79185	0.955563	no
ENSORLG00000002191	ENSORLG00000002191	-	chr1:6671095-6678099	medial	apical	NOTEST	0.0193902	0		#NAME?	0	1	1	no
ENSORLG00000002192	ENSORLG00000002192	pnisr	chr16:4718966-4727828	medial	apical	OK	49.8555	53.7773		0.109245	0.345495	0.54	0.870056	no
ENSORLG00000002194	ENSORLG00000002194	ABLIM3 (1 of many)	chr14:8046259-8096965	medial	apical	NOTEST	0	0		0	0	1	1	no
ENSORLG00000002195	ENSORLG00000002195	zgc:153018	chr10:11833092-11837635	medial	apical	OK	36.6648	38.9564		0.0874668	0.265213	0.63735	0.914826	no
ENSORLG00000002196	ENSORLG00000002196	map4k3b	chr15:10880158-10932935	medial	apical	OK	25.0689	25.9813		0.0515712	0.154899	0.78975	0.955563	no
ENSORLG00000002198	ENSORLG00000002198	f2rl1.2	chr12:3386324-3390339	medial	apical	NOTEST	3.03396	3.04283		0.00421042	0	1	1	no
ENSORLG00000002199	ENSORLG00000002199	-	chr17:1754591-1821805	medial	apical	NOTEST	0.0399564	0.0561056		0.489719	0	1	1	no
ENSORLG00000002200	ENSORLG00000002200	prelid1b	chr18:526398-527003	medial	apical	OK	7.52533	8.80053		0.225836	0.184558	0.73435	0.942369	no
ENSORLG00000002201	ENSORLG00000002201	napab	chr13:5018858-5031560	medial	apical	OK	20.3907	19.7715		-0.0444905	-0.119365	0.8327	0.964382	no
ENSORLG00000002202	ENSORLG00000002202	-	chr2:13927486-13935346	medial	apical	OK	10.0346	9.04983		-0.149018	-0.366061	0.5245	0.865884	no
ENSORLG00000002203	ENSORLG00000002203	tbc1d22b	chr7:4873807-4893244	medial	apical	OK	12.2299	13.9126		0.185978	0.327037	0.56785	0.884896	no
ENSORLG00000002204	ENSORLG00000002204	nudt22	chr10:11837666-11850666	medial	apical	OK	16.1441	20.9586		0.376533	1.08069	0.05595	0.357389	no
ENSORLG00000002205	ENSORLG00000002205	ch25hl2	chr12:3393211-3394069	medial	apical	OK	2.01192	4.08591		1.02209	0.938668	0.09015	0.445037	no
ENSORLG00000002206	ENSORLG00000002206	cratb	chr11:5671377-5684999	medial	apical	OK	24.5122	26.5863		0.117183	0.347257	0.5444	0.87306	no
ENSORLG00000002207	ENSORLG00000002207	smad3a	chr3:12624205-12652748	medial	apical	NOTEST	0.0478718	0.0898637		0.908563	0	1	1	no
ENSORLG00000002208	ENSORLG00000002208	faxcb	chr16:4745212-4764393	medial	apical	NOTEST	0.498623	0.553076		0.149528	0	1	1	no
ENSORLG00000002209	ENSORLG00000002209	btr01	chr1:6712459-6722395	medial	apical	NOTEST	0.195277	0.0967928		-1.01255	0	1	1	no
ENSORLG00000002210	ENSORLG00000002210	-	chr18:530001-533959	medial	apical	OK	4.53277	2.9435		-0.622864	-0.655023	0.24215	0.67335	no
ENSORLG00000002213	ENSORLG00000002213	setd1a	chr8:3965844-4066104	medial	apical	NOTEST	0.11162	0.121918		0.127306	0	1	1	no
ENSORLG00000002214	ENSORLG00000002214	adrb2b	chr14:8112994-8122146	medial	apical	OK	10.2064	18.1623	28.3687	0.831482	1.85408	0.0016	0.035809	yes
ENSORLG00000002216	ENSORLG00000002216	dnajc4	chr10:11851029-11858484	medial	apical	OK	47.672	42.7918		-0.155807	-0.505195	0.3771	0.786729	no
ENSORLG00000002217	ENSORLG00000002217	PI4KA	chr9:6053897-6077648	medial	apical	NOTEST	0.72869	1.17891		0.694079	0	1	1	no
ENSORLG00000002219	ENSORLG00000002219	acy1	chr5:4813645-4827196	medial	apical	NOTEST	1.88104	1.57723		-0.254138	0	1	1	no
ENSORLG00000002220	ENSORLG00000002220	fbxl4	chr16:4784541-4803617	medial	apical	NOTEST	0	0.0553731		inf	0	1	1	no
ENSORLG00000002222	ENSORLG00000002222	bicra	chr13:5037322-5047575	medial	apical	NOTEST	1.1001	0.8843		-0.31503	0	1	1	no
ENSORLG00000002225	ENSORLG00000002225	stk11ip	chr2:13941878-13984643	medial	apical	OK	5.46169	5.73112		0.0694709	0.167441	0.7721	0.952041	no
ENSORLG00000002226	ENSORLG00000002226	hdlbpa	chr4:4233113-4248539	medial	apical	NOTEST	0.990173	1.19		0.265214	0	1	1	no
ENSORLG00000002227	ENSORLG00000002227	smad6a	chr3:12673785-12696518	medial	apical	NOTEST	0	0		0	0	1	1	no
ENSORLG00000002228	ENSORLG00000002228	crhbp	chr12:3426636-3508126	medial	apical	OK	9.61485	9.13106		-0.0744822	-0.161641	0.77665	0.952138	no
ENSORLG00000002231	ENSORLG00000002231	-	chr11:5706365-5722067	medial	apical	NOTEST	1.47312	1.41749		-0.0555279	0	1	1	no
ENSORLG00000002233	ENSORLG00000002233	-	chr16:4821409-5027651	medial	apical	OK	5.76981	5.8611		0.0226474	0.0402781	0.94125	0.983473	no
ENSORLG00000002234	ENSORLG00000002234	zgc:77041	chr3:12709811-12717445	medial	apical	OK	34.383	33.3483		-0.0440812	-0.142379	0.801	0.95637	no
ENSORLG00000002235	ENSORLG00000002235	HYAL2 (1 of many)	chr5:4834567-4839959	medial	apical	NOTEST	1.26451	1.78368		0.496282	0	1	1	no
ENSORLG00000002237	ENSORLG00000002237	slc17a5	chr15:10966812-10981019	medial	apical	OK	36.0354	31.9854		-0.172	-0.416982	0.4727	0.841532	no
ENSORLG00000002238	ENSORLG00000002238	il12bb	chr14:8168481-8178095	medial	apical	NOTEST	0.398173	0.159845		-1.31672	0	1	1	no
ENSORLG00000002241	ENSORLG00000002241	rassf1 (1 of many)	chr5:4850842-4857949	medial	apical	NOTEST	0.474717	1.2089		1.34855	0	1	1	no
ENSORLG00000002242	ENSORLG00000002242	cyp17a2	chr18:551863-558794	medial	apical	OK	23.849	27.5018		0.205596	0.520855	0.3725	0.784095	no
ENSORLG00000002243	ENSORLG00000002243	igfbp5a	chr2:14021135-14026349	medial	apical	NOTEST	0	0.153623		inf	0	1	1	no
ENSORLG00000002244	ENSORLG00000002244	ehd2b	chr13:5050690-5058323	medial	apical	NOTEST	0.220357	0.546767		1.31108	0	1	1	no
ENSORLG00000002245	ENSORLG00000002245	cyb561d2	chr5:4862883-4867743	medial	apical	NOTEST	0	0		0	0	1	1	no
ENSORLG00000002246	ENSORLG00000002246	ccdc47	chr8:3965844-4066104	medial	apical	NOTEST	0.111182	0		#NAME?	0	1	1	no
ENSORLG00000002247	ENSORLG00000002247	serpind1	chr9:6053897-6077648	medial	apical	NOTEST	0.0818266	0		#NAME?	0	1	1	no
ENSORLG00000002248	ENSORLG00000002248	nup88	chr13:5058922-5066861	medial	apical	NOTEST	0.552076	0.879448		0.671731	0	1	1	no
ENSORLG00000002249	ENSORLG00000002249	-	chr1:6729559-6770009	medial	apical	NOTEST	0.138111	0.234245		0.762196	0	1	1	no
ENSORLG00000002250	ENSORLG00000002250	hs2st1b	chr4:4532212-4551525	medial	apical	OK	13.1137	0.631531	13.7452	-4.37608	-4.85344	5e-05	0.00225489	yes
ENSORLG00000002251	ENSORLG00000002251	exosc7	chr11:5722087-5731054	medial	apical	OK	47.3282	49.2878		0.0585311	0.180192	0.7579	0.948838	no
ENSORLG00000002252	ENSORLG00000002252	myt1b	chr7:4896172-5024166	medial	apical	OK	70.4828	68.0225		-0.0512604	-0.145975	0.7964	0.95637	no
ENSORLG00000002253	ENSORLG00000002253	si:ch73-290k24.5	chr18:571918-578082	medial	apical	NOTEST	0.120179	0		#NAME?	0	1	1	no
ENSORLG00000002254	ENSORLG00000002254	mms22l	chr16:5054144-5110091	medial	apical	OK	7.7074	8.56536		0.15227	0.405239	0.48275	0.847887	no
ENSORLG00000002255	ENSORLG00000002255	tmem42b	chr11:5744956-5747157	medial	apical	OK	204.782	243.806		0.251646	0.712218	0.21105	0.638819	no
ENSORLG00000002256	ENSORLG00000002256	stx5a	chr10:11889984-11898464	medial	apical	OK	9.74951	13.4458		0.463751	1.23313	0.03095	0.251542	no
ENSORLG00000002257	ENSORLG00000002257	rlbp1a	chr3:12729795-12731859	medial	apical	NOTEST	1.38002	0.239575		-2.52613	0	1	1	no
ENSORLG00000002258	ENSORLG00000002258	EEF1A1	chr15:10982345-11013027	medial	apical	NOTEST	2.11086	3.05513		0.533398	0	1	1	no
ENSORLG00000002261	ENSORLG00000002261	ublcp1	chr14:8168481-8178095	medial	apical	OK	5.70389	6.30036		0.143489	0.31112	0.55345	0.875809	no
ENSORLG00000002262	ENSORLG00000002262	zgc:162144	chr10:11899702-11900752	medial	apical	NOTEST	1.6346	3.0243		0.887665	0	1	1	no
ENSORLG00000002265	ENSORLG00000002265	snap29	chr9:6082137-6085273	medial	apical	NOTEST	0.122163	0		#NAME?	0	1	1	no
ENSORLG00000002267	ENSORLG00000002267	ddx43	chr15:11013090-11035867	medial	apical	NOTEST	0.0350937	0.342557		3.28706	0	1	1	no
ENSORLG00000002268	ENSORLG00000002268	-	chr18:589009-690222	medial	apical	NOTEST	0.757781	1.01002		0.414533	0	1	1	no
ENSORLG00000002269	ENSORLG00000002269	dcaf7	chr8:4066635-4073527	medial	apical	NOTEST	0.020718	0		#NAME?	0	1	1	no
ENSORLG00000002270	ENSORLG00000002270	si:dkey-178e17.3	chr9:6090893-6106717	medial	apical	NOTEST	0	0		0	0	1	1	no
ENSORLG00000002272	ENSORLG00000002272	RPS6KB2	chr1:6773857-6784407	medial	apical	NOTEST	0.0639571	0.127689		0.997456	0	1	1	no
ENSORLG00000002273	ENSORLG00000002273	pde8b	chr12:3426636-3508126	medial	apical	NOTEST	1.76473	2.52173		0.514966	0	1	1	no
ENSORLG00000002274	ENSORLG00000002274	OSBPL10	chr11:5759189-5914027	medial	apical	OK	1.05439	4.8191	5.87349	2.19235	2.22947	0.0013	0.0306984	yes
ENSORLG00000002275	ENSORLG00000002275	lrrc8c	chr4:4844196-4858623	medial	apical	NOTEST	0.278775	0.469708		0.752661	0	1	1	no
ENSORLG00000002276	ENSORLG00000002276	rad54l2	chr5:4869559-4897301	medial	apical	NOTEST	0.757926	1.55857		1.04009	0	1	1	no
ENSORLG00000002277	ENSORLG00000002277	kcnk4a	chr10:11930932-11941027	medial	apical	OK	67.8601	65.9039		-0.0422015	-0.143032	0.80075	0.95637	no
ENSORLG00000002279	ENSORLG00000002279	kcnq5a	chr15:11036286-11162711	medial	apical	NOTEST	0.110627	0		#NAME?	0	1	1	no
ENSORLG00000002280	ENSORLG00000002280	PCMTD2	chr7:5028176-5047498	medial	apical	OK	3.15445	4.42075		0.486902	0.257394	0.6998	0.930807	no
ENSORLG00000002282	ENSORLG00000002282	rnf145b	chr14:8187583-8195508	medial	apical	NOTEST	0.0774956	0.0639384		-0.277431	0	1	1	no
ENSORLG00000002284	ENSORLG00000002284	-	chr18:707234-708449	medial	apical	OK	34.287	28.6298		-0.260145	-0.644085	0.261	0.689942	no
ENSORLG00000002285	ENSORLG00000002285	psmd8	chr13:5058922-5066861	medial	apical	NOTEST	2.61954	2.8439		0.118559	0	1	1	no
ENSORLG00000002286	ENSORLG00000002286	lrrc8db	chr4:4864408-4866952	medial	apical	NOTEST	1.02694	1.06219		0.0486953	0	1	1	no
ENSORLG00000002287	ENSORLG00000002287	abhd2a	chr3:12733130-12763501	medial	apical	OK	46.763	56.325		0.268407	0.807396	0.15525	0.563674	no
ENSORLG00000002289	ENSORLG00000002289	-	chr18:715289-721756	medial	apical	NOTEST	0.158403	0.384112		1.27793	0	1	1	no
ENSORLG00000002291	ENSORLG00000002291	spred3	chr13:5067894-5104021	medial	apical	NOTEST	1.43365	3.01391		1.07194	0	1	1	no
ENSORLG00000002292	ENSORLG00000002292	si:dkey-178e17.1	chr9:6111610-6128670	medial	apical	NOTEST	0.728151	0.730105		0.00386682	0	1	1	no
ENSORLG00000002293	ENSORLG00000002293	bap1	chr5:4869559-4897301	medial	apical	NOTEST	1.31878	2.182		0.726447	0	1	1	no
ENSORLG00000002295	ENSORLG00000002295	barhl2	chr4:5056641-5059833	medial	apical	NOTEST	0	0		0	0	1	1	no
ENSORLG00000002296	ENSORLG00000002296	kif5ba	chr17:1825306-1848949	medial	apical	NOTEST	0.158649	0.107589		-0.560306	0	1	1	no
ENSORLG00000002297	ENSORLG00000002297	-	chr1:28964728-28990181	medial	apical	NOTEST	0.148952	0		#NAME?	0	1	1	no
ENSORLG00000002298	ENSORLG00000002298	zgc:101853	chr18:725268-727024	medial	apical	OK	11.2595	4.62339		-1.28412	-1.87594	0.0029	0.0531933	no
ENSORLG00000002299	ENSORLG00000002299	wdr41	chr12:3426636-3508126	medial	apical	NOTEST	0.762956	0.892525		0.226292	0	1	1	no
ENSORLG00000002300	ENSORLG00000002300	STT3B	chr11:5759189-5914027	medial	apical	NOTEST	0.043787	0.210351		2.26422	0	1	1	no
ENSORLG00000002301	ENSORLG00000002301	-	chr2:14075703-14087112	medial	apical	NOTEST	1.53086	1.5199		-0.010366	0	1	1	no
ENSORLG00000002302	ENSORLG00000002302	mfge8a	chr3:12733130-12763501	medial	apical	OK	35.6795	30.7996		-0.212181	-0.350618	0.54385	0.87306	no
ENSORLG00000002305	ENSORLG00000002305	kif3b	chr7:5028176-5047498	medial	apical	OK	23.2234	27.1127		0.223392	0.711566	0.21255	0.640641	no
ENSORLG00000002306	ENSORLG00000002306	-	chr11:5989533-6347342	medial	apical	OK	5.28538	4.11082		-0.362581	-0.451077	0.41065	0.810223	no
ENSORLG00000002307	ENSORLG00000002307	-	chr4:5172461-5190225	medial	apical	NOTEST	0.684763	1.39645		1.02809	0	1	1	no
ENSORLG00000002308	ENSORLG00000002308	dhx34	chr13:5067894-5104021	medial	apical	NOTEST	2.19485	1.56606		-0.486989	0	1	1	no
ENSORLG00000002312	ENSORLG00000002312	bsnb	chr5:4899737-4987462	medial	apical	NOTEST	1.11564	1.8074		0.696046	0	1	1	no
ENSORLG00000002313	ENSORLG00000002313	klhl32	chr16:5054144-5110091	medial	apical	OK	5.83594	6.98066		0.258399	0.255733	0.6582	0.921972	no
ENSORLG00000002315	ENSORLG00000002315	-	chr18:766508-787630	medial	apical	OK	13.9006	17.9005		0.364854	0.497263	0.3307	0.758456	no
ENSORLG00000002316	ENSORLG00000002316	neurl1aa	chr1:7671810-7732284	medial	apical	NOTEST	0	0		0	0	1	1	no
ENSORLG00000002317	ENSORLG00000002317	kcnh6a	chr8:4073671-4102383	medial	apical	NOTEST	0.0294196	0		#NAME?	0	1	1	no
ENSORLG00000002318	ENSORLG00000002318	-	chr6:11097331-11122445	medial	apical	NOTEST	0.0611513	0.0240386		-1.34703	0	1	1	no
ENSORLG00000002319	ENSORLG00000002319	-	chr2:14212764-14219702	medial	apical	NOTEST	2.75334	3.5058		0.348563	0	1	1	no
ENSORLG00000002320	ENSORLG00000002320	eomesa	chr11:6420172-6424054	medial	apical	OK	3.89884	4.11996		0.0795852	0.145573	0.80295	0.95637	no
ENSORLG00000002321	ENSORLG00000002321	fzd6	chr16:5112633-5129039	medial	apical	NOTEST	0.107895	0.261385		1.27655	0	1	1	no
ENSORLG00000002322	ENSORLG00000002322	pold3	chr17:1859063-1864853	medial	apical	NOTEST	0	0.318649		inf	0	1	1	no
ENSORLG00000002323	ENSORLG00000002323	frmpd2	chr19:1803496-1814916	medial	apical	NOTEST	0.52191	1.36117		1.38297	0	1	1	no
ENSORLG00000002324	ENSORLG00000002324	SECISBP2L	chr3:12786400-12806910	medial	apical	OK	4.12061	10.1266	14.2472	1.29721	3.26405	5e-05	0.00225489	yes
ENSORLG00000002325	ENSORLG00000002325	cltcl1	chr9:6131289-6151535	medial	apical	NOTEST	0.946123	0.76097		-0.314189	0	1	1	no
ENSORLG00000002328	ENSORLG00000002328	sgta	chr4:5204245-5215918	medial	apical	NOTEST	1.35776	1.74772		0.364237	0	1	1	no
ENSORLG00000002329	ENSORLG00000002329	pofut1	chr7:5048010-5061103	medial	apical	NOTEST	0	0		0	0	1	1	no
ENSORLG00000002330	ENSORLG00000002330	cthrc1a	chr16:5130710-5136610	medial	apical	NOTEST	0	0		0	0	1	1	no
ENSORLG00000002331	ENSORLG00000002331	mettl21a	chr2:14220342-14223601	medial	apical	NOTEST	1.79346	2.8954		0.691017	0	1	1	no
ENSORLG00000002332	ENSORLG00000002332	-	chr17:2052320-2127546	medial	apical	NOTEST	0	0		0	0	1	1	no
ENSORLG00000002333	ENSORLG00000002333	SLC39A3	chr4:5215938-5220334	medial	apical	NOTEST	0.10456	0.480985		2.20166	0	1	1	no
ENSORLG00000002334	ENSORLG00000002334	st14a	chr13:5067894-5104021	medial	apical	NOTEST	0.0633274	0.168528		1.41209	0	1	1	no
ENSORLG00000002335	ENSORLG00000002335	-	chr17:2162365-2260173	medial	apical	NOTEST	0	0.418258		inf	0	1	1	no
ENSORLG00000002336	ENSORLG00000002336	tgfb2l	chr10:11945125-11956758	medial	apical	OK	13.2451	8.16784		-0.697428	-1.77495	0.0027	0.0510871	no
ENSORLG00000002337	ENSORLG00000002337	sh3pxd2aa	chr1:7744358-7841654	medial	apical	NOTEST	0	0		0	0	1	1	no
ENSORLG00000002338	ENSORLG00000002338	plagl2	chr7:5073485-5124090	medial	apical	NOTEST	0.592502	0.331951		-0.835852	0	1	1	no
ENSORLG00000002339	ENSORLG00000002339	slc1a8a	chr4:5228569-5247405	medial	apical	NOTEST	0	0		0	0	1	1	no
ENSORLG00000002341	ENSORLG00000002341	erc2	chr5:5014324-5068180	medial	apical	OK	32.7154	44.2951		0.437179	1.33759	0.02015	0.194166	no
ENSORLG00000002342	ENSORLG00000002342	EBF1 (1 of many)	chr14:8201560-8292782	medial	apical	NOTEST	0.0637343	0.360889		2.50141	0	1	1	no
ENSORLG00000002343	ENSORLG00000002343	ppp3r1a	chr15:11172640-11199814	medial	apical	OK	9.8808	9.67073		-0.0310036	-0.0538412	0.92655	0.982228	no
ENSORLG00000002345	ENSORLG00000002345	slc25a32b	chr16:5137470-5142538	medial	apical	NOTEST	0	0		0	0	1	1	no
ENSORLG00000002346	ENSORLG00000002346	gfap	chr8:4105765-4113603	medial	apical	NOTEST	0	0		0	0	1	1	no
ENSORLG00000002348	ENSORLG00000002348	tm9sf4	chr7:5128997-5148939	medial	apical	NOTEST	0.0161421	0.181549		3.49146	0	1	1	no
ENSORLG00000002349	ENSORLG00000002349	-	chr20:2466200-2492560	medial	apical	NOTEST	0.0980829	0.152485		0.636597	0	1	1	no
ENSORLG00000002350	ENSORLG00000002350	trmt112	chr10:11959134-11965090	medial	apical	NOTEST	1.51163	0		#NAME?	0	1	1	no
ENSORLG00000002351	ENSORLG00000002351	cops2	chr3:12807002-12816835	medial	apical	OK	9.36257	15.7235		0.747943	1.70257	0.0029	0.0531933	no
ENSORLG00000002353	ENSORLG00000002353	stn1	chr1:7744358-7841654	medial	apical	NOTEST	0	0		0	0	1	1	no
ENSORLG00000002354	ENSORLG00000002354	zgc:113223	chr4:5260501-5268003	medial	apical	NOTEST	1.1545	0		#NAME?	0	1	1	no
ENSORLG00000002355	ENSORLG00000002355	plat	chr9:6172548-6192066	medial	apical	NOTEST	0.0180874	0		#NAME?	0	1	1	no
ENSORLG00000002356	ENSORLG00000002356	htatsf1	chr14:8351548-8362286	medial	apical	OK	77.6175	79.4765		0.0341453	0.0887734	0.8777	0.971703	no
ENSORLG00000002357	ENSORLG00000002357	map3k3	chr8:4119364-4135500	medial	apical	NOTEST	0	0		0	0	1	1	no
ENSORLG00000002359	ENSORLG00000002359	creb1b (1 of many)	chr2:14225960-14229983	medial	apical	NOTEST	0	0		0	0	1	1	no
ENSORLG00000002360	ENSORLG00000002360	fgf7	chr3:12857176-12861156	medial	apical	NOTEST	0	0		0	0	1	1	no
ENSORLG00000002361	ENSORLG00000002361	card19	chr5:5141137-5152627	medial	apical	NOTEST	0	0		0	0	1	1	no
ENSORLG00000002363	ENSORLG00000002363	dcaf13	chr16:5143491-5331256	medial	apical	NOTEST	0	0		0	0	1	1	no
ENSORLG00000002364	ENSORLG00000002364	-	chr18:766508-787630	medial	apical	NOTEST	2.8783	0.9371		-1.61894	0	1	1	no
ENSORLG00000002365	ENSORLG00000002365	ap3b1a	chr12:3593394-3695963	medial	apical	OK	100.497	95.2446		-0.0774406	-0.269809	0.6366	0.914826	no
ENSORLG00000002367	ENSORLG00000002367	bicd2	chr5:5153599-5165796	medial	apical	NOTEST	0.697165	0.688427		-0.0181956	0	1	1	no
ENSORLG00000002368	ENSORLG00000002368	hck	chr7:5150641-5174725	medial	apical	NOTEST	0	0.0388216		inf	0	1	1	no
ENSORLG00000002369	ENSORLG00000002369	bnip1b	chr14:8351548-8362286	medial	apical	NOTEST	1.72705	0.720151		-1.26194	0	1	1	no
ENSORLG00000002370	ENSORLG00000002370	mapk8b	chr19:1818698-1834595	medial	apical	OK	7.41165	9.53936		0.364097	0.731852	0.20125	0.623823	no
ENSORLG00000002371	ENSORLG00000002371	pno1	chr15:11200476-11205438	medial	apical	OK	34.5217	27.1391		-0.347131	-0.976802	0.08985	0.444782	no
ENSORLG00000002372	ENSORLG00000002372	si:ch211-93g23.2	chr2:14433051-14436690	medial	apical	NOTEST	2.00968	0.756863		-1.40886	0	1	1	no
ENSORLG00000002373	ENSORLG00000002373	dtwd1	chr3:12870653-12899397	medial	apical	NOTEST	0	0		0	0	1	1	no
ENSORLG00000002374	ENSORLG00000002374	-	chr6:11129445-11140678	medial	apical	NOTEST	0.114133	0.162576		0.510405	0	1	1	no
ENSORLG00000002376	ENSORLG00000002376	-	chr7:5182340-5231055	medial	apical	NOTEST	0.609156	0.474769		-0.359586	0	1	1	no
ENSORLG00000002377	ENSORLG00000002377	-	chr17:2329761-2338993	medial	apical	OK	1.82695	4.2172		1.20684	1.42136	0.0268	0.234324	no
ENSORLG00000002380	ENSORLG00000002380	slkb	chr1:7841674-7869234	medial	apical	NOTEST	0	0		0	0	1	1	no
ENSORLG00000002381	ENSORLG00000002381	scamp1	chr12:3593394-3695963	medial	apical	NOTEST	0.63413	1.05863		0.739355	0	1	1	no
ENSORLG00000002383	ENSORLG00000002383	-	chr7:5462045-5469185	medial	apical	NOTEST	0.0601349	0		#NAME?	0	1	1	no
ENSORLG00000002384	ENSORLG00000002384	crebrf	chr14:8372129-8390704	medial	apical	NOTEST	2.40904	2.98911		0.31126	0	1	1	no
ENSORLG00000002385	ENSORLG00000002385	-	chr11:6430995-6490615	medial	apical	NOTEST	0	0.0330859		inf	0	1	1	no
ENSORLG00000002386	ENSORLG00000002386	lhfpl2a	chr12:3695983-3721500	medial	apical	NOTEST	2.20993	2.55857		0.211334	0	1	1	no
ENSORLG00000002387	ENSORLG00000002387	si:dkey-191m6.4	chr19:1840850-1863057	medial	apical	NOTEST	0.0310392	0.03833		0.304382	0	1	1	no
ENSORLG00000002389	ENSORLG00000002389	si:ch73-45o6.2	chr10:11965766-11992315	medial	apical	OK	5.72241	4.79318		-0.255639	-0.666783	0.2509	0.680026	no
ENSORLG00000002390	ENSORLG00000002390	wdr55	chr18:824813-879413	medial	apical	OK	13.5128	13.2571		-0.0275601	-0.0691917	0.9038	0.978934	no
ENSORLG00000002392	ENSORLG00000002392	erbb4a	chr2:14458255-14808032	medial	apical	OK	5.56779	5.75672		0.0481412	0.108512	0.85125	0.967374	no
ENSORLG00000002393	ENSORLG00000002393	aplp2	chr13:5105853-5169465	medial	apical	NOTEST	0.0911429	0.204073		1.16288	0	1	1	no
ENSORLG00000002394	ENSORLG00000002394	lrrc18b	chr19:1864402-1869799	medial	apical	NOTEST	0.886347	1.58856		0.841776	0	1	1	no
ENSORLG00000002395	ENSORLG00000002395	ddx42	chr8:4153478-4161498	medial	apical	OK	6.624	9.35364		0.497826	1.01245	0.0738	0.405989	no
ENSORLG00000002396	ENSORLG00000002396	FBLN1	chr6:11150518-11183544	medial	apical	NOTEST	1.43612	2.19807		0.614055	0	1	1	no
ENSORLG00000002398	ENSORLG00000002398	ARSB	chr12:3744467-3767769	medial	apical	OK	12.9333	15.0828		0.221814	0.618288	0.28295	0.715788	no
ENSORLG00000002399	ENSORLG00000002399	vstm4b	chr19:1874724-1888309	medial	apical	NOTEST	0.230143	0.187052		-0.29909	0	1	1	no
ENSORLG00000002400	ENSORLG00000002400	thop1	chr4:5312633-5326829	medial	apical	NOTEST	0.227283	0.107708		-1.07736	0	1	1	no
ENSORLG00000002401	ENSORLG00000002401	-	chr18:884004-893457	medial	apical	NOTEST	0.0194333	0.017901		-0.118494	0	1	1	no
ENSORLG00000002403	ENSORLG00000002403	DIP2C (1 of many)	chr20:2511072-2573854	medial	apical	NOTEST	0.664038	0.844184		0.346293	0	1	1	no
ENSORLG00000002404	ENSORLG00000002404	pcyox1l	chr14:8394024-8401239	medial	apical	OK	31.4539	32.8986		0.0647908	0.199662	0.7267	0.939764	no
ENSORLG00000002405	ENSORLG00000002405	dmgdh	chr12:3767829-3792987	medial	apical	OK	4.6013	5.00853		0.122345	0.249014	0.6677	0.924484	no
ENSORLG00000002407	ENSORLG00000002407	slco4a1	chr7:5497443-5525643	medial	apical	NOTEST	0.010345	0		#NAME?	0	1	1	no
ENSORLG00000002408	ENSORLG00000002408	wnt7bb	chr6:11278760-11311289	medial	apical	NOTEST	0.400181	0.126402		-1.66264	0	1	1	no
ENSORLG00000002409	ENSORLG00000002409	lancl1	chr2:14913465-14925426	medial	apical	NOTEST	0	0		0	0	1	1	no
ENSORLG00000002411	ENSORLG00000002411	meis1b	chr15:11478165-11552192	medial	apical	NOTEST	0.287334	0.170449		-0.753387	0	1	1	no
ENSORLG00000002413	ENSORLG00000002413	pparab	chr6:11396335-11431942	medial	apical	OK	19.7893	21.4038		0.113144	0.291636	0.6151	0.907817	no
ENSORLG00000002415	ENSORLG00000002415	-	chr18:908300-941721	medial	apical	OK	8.75695	13.6471		0.640094	0.904107	0.1245	0.51544	no
ENSORLG00000002416	ENSORLG00000002416	prdm10	chr13:5172962-5187651	medial	apical	NOTEST	0.042207	0.0765717		0.85933	0	1	1	no
ENSORLG00000002417	ENSORLG00000002417	RIMS2	chr16:5143491-5331256	medial	apical	NOTEST	0.106404	0.0338197		-1.65361	0	1	1	no
ENSORLG00000002419	ENSORLG00000002419	ntsr1	chr7:5561808-5621701	medial	apical	OK	3.91522	4.29053		0.132065	0.229926	0.68845	0.928641	no
ENSORLG00000002420	ENSORLG00000002420	lratb.2 (1 of many)	chr18:1233823-1248536	medial	apical	NOTEST	0	0		0	0	1	1	no
ENSORLG00000002421	ENSORLG00000002421	mrtfab	chr19:1892809-1935809	medial	apical	OK	3.2798	3.74516		0.191423	0.441448	0.428	0.819035	no
ENSORLG00000002424	ENSORLG00000002424	yars2	chr6:11431962-11441210	medial	apical	NOTEST	0.0884822	0		#NAME?	0	1	1	no
ENSORLG00000002426	ENSORLG00000002426	strada	chr8:4161693-4183823	medial	apical	NOTEST	0.792595	0.134379		-2.56028	0	1	1	no
ENSORLG00000002427	ENSORLG00000002427	DCSTAMP	chr16:5333010-5334739	medial	apical	NOTEST	0	0		0	0	1	1	no
ENSORLG00000002429	ENSORLG00000002429	rbm46	chr18:1233823-1248536	medial	apical	NOTEST	0	0		0	0	1	1	no
ENSORLG00000002431	ENSORLG00000002431	bhmt	chr12:3798548-3806625	medial	apical	NOTEST	1.00144	0.344108		-1.54114	0	1	1	no
ENSORLG00000002432	ENSORLG00000002432	mylz3	chr2:14925830-14928550	medial	apical	NOTEST	0	0		0	0	1	1	no
ENSORLG00000002434	ENSORLG00000002434	nnt2	chr3:12870653-12899397	medial	apical	OK	20.874	18.3844		-0.183223	-0.310653	0.5921	0.896369	no
ENSORLG00000002435	ENSORLG00000002435	SPRED2 (1 of many)	chr15:11707436-11735536	medial	apical	OK	14.3009	13.8178		-0.0495821	-0.121989	0.83345	0.964725	no
ENSORLG00000002436	ENSORLG00000002436	xrcc6	chr19:1976070-1981819	medial	apical	OK	9.01568	8.96053		-0.00885304	-0.0201208	0.97185	0.991096	no
ENSORLG00000002438	ENSORLG00000002438	-	chr17:2352988-2395960	medial	apical	NOTEST	0.987141	1.15521		0.226822	0	1	1	no
ENSORLG00000002439	ENSORLG00000002439	TCERG1	chr14:8401340-8416797	medial	apical	OK	11.7571	14.6645		0.318794	0.882566	0.11975	0.510491	no
ENSORLG00000002440	ENSORLG00000002440	npy2rl	chr18:1324740-1378842	medial	apical	NOTEST	0	0		0	0	1	1	no
ENSORLG00000002441	ENSORLG00000002441	dtd1	chr1:7904732-7921983	medial	apical	NOTEST	0	0		0	0	1	1	no
ENSORLG00000002442	ENSORLG00000002442	rnf113a	chr8:4161693-4183823	medial	apical	NOTEST	0.0309012	0		#NAME?	0	1	1	no
ENSORLG00000002443	ENSORLG00000002443	spata5l1	chr3:12870653-12899397	medial	apical	OK	53.0397	41.5643		-0.35173	-0.943417	0.1005	0.477847	no
ENSORLG00000002444	ENSORLG00000002444	eif1axb	chr20:2731029-2738890	medial	apical	OK	7.07215	8.32446		0.235207	0.352607	0.5336	0.869018	no
ENSORLG00000002446	ENSORLG00000002446	cdon	chr13:5283247-5320504	medial	apical	NOTEST	0.145985	0.0449461		-1.69955	0	1	1	no
ENSORLG00000002447	ENSORLG00000002447	tkta	chr5:5169601-5178282	medial	apical	NOTEST	0.259547	0.0893467		-1.53851	0	1	1	no
ENSORLG00000002448	ENSORLG00000002448	JMY (1 of many)	chr12:3806645-3854221	medial	apical	NOTEST	0.127356	0.0494803		-1.36394	0	1	1	no
ENSORLG00000002449	ENSORLG00000002449	sdcbp2	chr7:5704612-5714935	medial	apical	OK	14.8127	14.0548		-0.0757712	-0.139692	0.8079	0.957626	no
ENSORLG00000002450	ENSORLG00000002450	acadl	chr2:14936916-14947259	medial	apical	NOTEST	1.18726	1.7115		0.527622	0	1	1	no
ENSORLG00000002451	ENSORLG00000002451	actr2a	chr15:11743033-11757828	medial	apical	NOTEST	1.96296	2.0805		0.083899	0	1	1	no
ENSORLG00000002453	ENSORLG00000002453	fga	chr18:1415815-1422687	medial	apical	NOTEST	0.0352091	0		#NAME?	0	1	1	no
ENSORLG00000002454	ENSORLG00000002454	SLC24A3	chr1:7925883-7984747	medial	apical	NOTEST	0	0		0	0	1	1	no
ENSORLG00000002455	ENSORLG00000002455	bcl9l	chr13:5342413-5371648	medial	apical	NOTEST	0.0411085	0		#NAME?	0	1	1	no
ENSORLG00000002456	ENSORLG00000002456	lonp1	chr4:5328615-5350978	medial	apical	OK	8.2341	6.08854		-0.435514	-0.976717	0.0901	0.445037	no
ENSORLG00000002457	ENSORLG00000002457	kcnj9	chr17:2450035-2470447	medial	apical	NOTEST	2.0059	2.29378		0.193481	0	1	1	no
ENSORLG00000002460	ENSORLG00000002460	CLINT1 (1 of many)	chr14:8417759-8430167	medial	apical	OK	40.1161	39.6153		-0.0181223	-0.0592988	0.9196	0.98169	no
ENSORLG00000002461	ENSORLG00000002461	-	chr2:15021944-15026221	medial	apical	NOTEST	0	0		0	0	1	1	no
ENSORLG00000002462	ENSORLG00000002462	zgc:153681	chr10:11992795-12006158	medial	apical	OK	8.95408	9.98517		0.157241	0.376338	0.5074	0.858101	no
ENSORLG00000002464	ENSORLG00000002464	slc30a4	chr3:12906018-12921354	medial	apical	OK	42.6473	23.9462	66.5935	-0.832656	-2.68762	5e-05	0.00225489	yes
ENSORLG00000002465	ENSORLG00000002465	ikbkb	chr9:6194135-6233517	medial	apical	OK	5.07056	3.93976		-0.364039	-0.667113	0.2333	0.661936	no
ENSORLG00000002466	ENSORLG00000002466	si:ch211-85n16.4	chr1:7984767-8014464	medial	apical	NOTEST	0	0		0	0	1	1	no
ENSORLG00000002467	ENSORLG00000002467	dpys	chr16:5336483-5352386	medial	apical	NOTEST	0.0118451	0		#NAME?	0	1	1	no
ENSORLG00000002469	ENSORLG00000002469	bloc1s6	chr3:12906018-12921354	medial	apical	NOTEST	0.189932	0		#NAME?	0	1	1	no
ENSORLG00000002470	ENSORLG00000002470	LRRC24	chr4:5328615-5350978	medial	apical	OK	4.8078	3.76176		-0.353969	-0.467602	0.4064	0.808719	no
ENSORLG00000002471	ENSORLG00000002471	-	chr14:8431543-8442591	medial	apical	OK	8.73518	9.60864		0.137494	0.202262	0.7209	0.937705	no
ENSORLG00000002472	ENSORLG00000002472	si:ch73-22a13.3	chr10:12011236-12019602	medial	apical	OK	6.40589	6.30447		-0.0230255	-0.046016	0.9374	0.982787	no
ENSORLG00000002474	ENSORLG00000002474	HOMER1 (1 of many)	chr12:3806645-3854221	medial	apical	NOTEST	0.139826	0.13383		-0.06323	0	1	1	no
ENSORLG00000002475	ENSORLG00000002475	eif3f	chr17:2471232-2504483	medial	apical	OK	10.791	7.84042		-0.460821	-1.04281	0.074	0.405989	no
ENSORLG00000002476	ENSORLG00000002476	cxcr5	chr13:5342413-5371648	medial	apical	NOTEST	0	0		0	0	1	1	no
ENSORLG00000002477	ENSORLG00000002477	PELI1 (1 of many)	chr15:11868246-11877853	medial	apical	OK	10.2005	8.76352		-0.219062	-0.557783	0.3262	0.756008	no
ENSORLG00000002480	ENSORLG00000002480	mibp2	chr3:12938597-12940880	medial	apical	NOTEST	0.859318	0.87361		0.023796	0	1	1	no
ENSORLG00000002481	ENSORLG00000002481	kcnq5b	chr1:8031286-8142740	medial	apical	NOTEST	0	0		0	0	1	1	no
ENSORLG00000002482	ENSORLG00000002482	sass6	chr4:5350998-5380209	medial	apical	NOTEST	0.871492	0.504609		-0.788322	0	1	1	no
ENSORLG00000002485	ENSORLG00000002485	-	chr17:2471232-2504483	medial	apical	NOTEST	0	0		0	0	1	1	no
ENSORLG00000002486	ENSORLG00000002486	-	chr14:8444751-8455827	medial	apical	NOTEST	1.881	1.04508		-0.847887	0	1	1	no
ENSORLG00000002487	ENSORLG00000002487	rundc3aa	chr8:4161693-4183823	medial	apical	NOTEST	0	0		0	0	1	1	no
ENSORLG00000002488	ENSORLG00000002488	ADCY3	chr16:5384694-5430446	medial	apical	NOTEST	0	0.0342125		inf	0	1	1	no
ENSORLG00000002490	ENSORLG00000002490	dtwd2	chr12:3861369-3876320	medial	apical	NOTEST	0.241451	0.0524623		-2.20238	0	1	1	no
ENSORLG00000002492	ENSORLG00000002492	fgb	chr18:1426776-1431800	medial	apical	NOTEST	0	0		0	0	1	1	no
ENSORLG00000002493	ENSORLG00000002493	vdac3	chr9:6194135-6233517	medial	apical	OK	9.48445	6.89587		-0.459832	-0.914901	0.1133	0.500564	no
ENSORLG00000002494	ENSORLG00000002494	pih1d3	chr17:2471232-2504483	medial	apical	NOTEST	0.727121	0.565212		-0.363403	0	1	1	no
ENSORLG00000002495	ENSORLG00000002495	adgrb1b	chr11:6619517-6636075	medial	apical	NOTEST	0.572237	0.901773		0.656151	0	1	1	no
ENSORLG00000002496	ENSORLG00000002496	ep300a	chr19:2010341-2037196	medial	apical	OK	3.86271	2.84406		-0.44166	-1.0786	0.0605	0.368779	no
ENSORLG00000002497	ENSORLG00000002497	-	chr16:5441345-5461740	medial	apical	NOTEST	0	0		0	0	1	1	no
ENSORLG00000002498	ENSORLG00000002498	nsfl1c	chr7:5736169-5743771	medial	apical	NOTEST	0	0		0	0	1	1	no
ENSORLG00000002499	ENSORLG00000002499	fam117aa	chr8:4185242-4191430	medial	apical	NOTEST	0.0855281	0		#NAME?	0	1	1	no
ENSORLG00000002500	ENSORLG00000002500	asl	chr14:8459645-8486025	medial	apical	OK	27.7592	22.6277		-0.294879	-0.842116	0.13965	0.539473	no
ENSORLG00000002501	ENSORLG00000002501	-	chr18:1433213-1439694	medial	apical	NOTEST	0.348256	0.138013		-1.33535	0	1	1	no
ENSORLG00000002502	ENSORLG00000002502	si:ch211-220d9.3	chr9:6233970-6241753	medial	apical	NOTEST	0.920486	0.785385		-0.228996	0	1	1	no
ENSORLG00000002506	ENSORLG00000002506	ddx6	chr13:5378897-5405472	medial	apical	NOTEST	0.0285678	0		#NAME?	0	1	1	no
ENSORLG00000002507	ENSORLG00000002507	ca4c	chr14:8459645-8486025	medial	apical	OK	4.27387	4.62581		0.114165	0.0618998	0.917	0.980878	no
ENSORLG00000002509	ENSORLG00000002509	polb	chr9:6233970-6241753	medial	apical	NOTEST	0.489119	0.646291		0.401997	0	1	1	no
ENSORLG00000002510	ENSORLG00000002510	l3mbtl2	chr19:2046140-2073346	medial	apical	NOTEST	1.21527	1.07422		-0.17798	0	1	1	no
ENSORLG00000002511	ENSORLG00000002511	dynll1	chr9:6243542-6250498	medial	apical	NOTEST	0	0		0	0	1	1	no
ENSORLG00000002512	ENSORLG00000002512	ugp2b	chr15:11879292-11900115	medial	apical	NOTEST	1.92297	2.58295		0.425685	0	1	1	no
ENSORLG00000002513	ENSORLG00000002513	FAM110A	chr7:5783824-5785201	medial	apical	NOTEST	0	0		0	0	1	1	no
ENSORLG00000002514	ENSORLG00000002514	slc35b1	chr8:4193452-4199817	medial	apical	NOTEST	0	0		0	0	1	1	no
ENSORLG00000002515	ENSORLG00000002515	hnrnpr	chr11:6654123-6659847	medial	apical	NOTEST	0	0		0	0	1	1	no
ENSORLG00000002516	ENSORLG00000002516	nfic	chr4:5350998-5380209	medial	apical	NOTEST	0.0572279	0		#NAME?	0	1	1	no
ENSORLG00000002517	ENSORLG00000002517	chadlb	chr19:2046140-2073346	medial	apical	NOTEST	2.58595	3.44752		0.414867	0	1	1	no
ENSORLG00000002519	ENSORLG00000002519	rpl6	chr9:6243542-6250498	medial	apical	NOTEST	0	0		0	0	1	1	no
ENSORLG00000002520	ENSORLG00000002520	zufsp	chr16:5465562-5473598	medial	apical	NOTEST	0	0		0	0	1	1	no
ENSORLG00000002521	ENSORLG00000002521	treh	chr13:5378897-5405472	medial	apical	NOTEST	0.209303	0.106815		-0.970482	0	1	1	no
ENSORLG00000002522	ENSORLG00000002522	-	chr8:4200386-4203743	medial	apical	NOTEST	0.039427	0.125293		1.66805	0	1	1	no
ENSORLG00000002523	ENSORLG00000002523	slc35c2	chr7:5819187-5834562	medial	apical	NOTEST	0.161452	0.0456352		-1.82289	0	1	1	no
ENSORLG00000002524	ENSORLG00000002524	mdhb	chr15:11902606-11990720	medial	apical	NOTEST	0	0		0	0	1	1	no
ENSORLG00000002526	ENSORLG00000002526	fermt3b	chr10:12027891-12206033	medial	apical	NOTEST	2.51278	1.46859		-0.774857	0	1	1	no
ENSORLG00000002527	ENSORLG00000002527	nectin1b	chr13:5801677-5902793	medial	apical	NOTEST	0.129377	0.170619		0.399195	0	1	1	no
ENSORLG00000002528	ENSORLG00000002528	aldh3a2b	chr14:8459645-8486025	medial	apical	NOTEST	0.340007	0.538076		0.662245	0	1	1	no
ENSORLG00000002529	ENSORLG00000002529	-	chr12:3876716-3892183	medial	apical	NOTEST	0.0351374	0.065338		0.894915	0	1	1	no
ENSORLG00000002530	ENSORLG00000002530	gprc6a	chr16:5487567-5503646	medial	apical	NOTEST	0.0215108	0.0442437		1.04041	0	1	1	no
ENSORLG00000002532	ENSORLG00000002532	lrrc47	chr7:5835128-5851341	medial	apical	OK	15.4138	14.6295		-0.0753451	-0.220581	0.69415	0.928641	no
ENSORLG00000002533	ENSORLG00000002533	ngfra	chr8:4536355-4565844	medial	apical	NOTEST	0	0		0	0	1	1	no
ENSORLG00000002534	ENSORLG00000002534	dnajc8	chr11:6660900-6666767	medial	apical	NOTEST	0	0		0	0	1	1	no
ENSORLG00000002535	ENSORLG00000002535	ttc36	chr13:6010348-6019483	medial	apical	NOTEST	0.0388539	0		#NAME?	0	1	1	no
ENSORLG00000002537	ENSORLG00000002537	-	chr8:4580643-4588537	medial	apical	NOTEST	0	0		0	0	1	1	no
ENSORLG00000002538	ENSORLG00000002538	-	chr7:5835128-5851341	medial	apical	NOTEST	0.955328	0.267848		-1.83458	0	1	1	no
ENSORLG00000002540	ENSORLG00000002540	-	chr18:1450641-1474532	medial	apical	NOTEST	0.0391126	4.33113e-06		-13.1406	0	1	1	no
ENSORLG00000002541	ENSORLG00000002541	lrrc40	chr4:5388679-5401994	medial	apical	NOTEST	0	0		0	0	1	1	no
ENSORLG00000002542	ENSORLG00000002542	ptpn2a	chr16:5514824-5536600	medial	apical	NOTEST	0.0841513	0.122711		0.544209	0	1	1	no
ENSORLG00000002543	ENSORLG00000002543	FBXO40	chr13:6010348-6019483	medial	apical	NOTEST	0.0622093	0.0786775		0.33882	0	1	1	no
ENSORLG00000002544	ENSORLG00000002544	flrt1b	chr10:12027891-12206033	medial	apical	NOTEST	0.0843361	0.333818		1.98484	0	1	1	no
ENSORLG00000002545	ENSORLG00000002545	si:ch211-127d4.3	chr12:3893242-3930820	medial	apical	NOTEST	0.108039	0.039803		-1.4406	0	1	1	no
ENSORLG00000002546	ENSORLG00000002546	vtnb	chr14:8491290-8503090	medial	apical	OK	7.33836	9.28495		0.339437	0.894963	0.1228	0.514679	no
ENSORLG00000002547	ENSORLG00000002547	rangap1b	chr19:2046140-2073346	medial	apical	OK	11.8488	12.0725		0.0269905	0.0675318	0.9073	0.97939	no
ENSORLG00000002548	ENSORLG00000002548	-	chr7:5860564-5870367	medial	apical	NOTEST	2.09947	1.5733		-0.41623	0	1	1	no
ENSORLG00000002549	ENSORLG00000002549	lig1	chr17:2525693-2601347	medial	apical	NOTEST	0.371504	0		#NAME?	0	1	1	no
ENSORLG00000002551	ENSORLG00000002551	rnf175	chr18:1450641-1474532	medial	apical	NOTEST	9.34112e-07	0.0910634		16.5729	0	1	1	no
ENSORLG00000002553	ENSORLG00000002553	-	chr6:11669389-11705230	medial	apical	NOTEST	0.0874629	0.0601588		-0.539896	0	1	1	no
ENSORLG00000002554	ENSORLG00000002554	-	chr7:5884959-5961613	medial	apical	OK	63.443	50.0827		-0.341149	-0.562948	0.3202	0.750219	no
ENSORLG00000002556	ENSORLG00000002556	rps6ka3b	chr20:2752125-2803873	medial	apical	NOTEST	0	0		0	0	1	1	no
ENSORLG00000002557	ENSORLG00000002557	slc4a1a	chr8:4596807-4603783	medial	apical	NOTEST	0.0287471	0		#NAME?	0	1	1	no
ENSORLG00000002558	ENSORLG00000002558	cep76	chr16:5538032-5555057	medial	apical	NOTEST	0	0		0	0	1	1	no
ENSORLG00000002559	ENSORLG00000002559	ccdc88b	chr10:12226527-12295884	medial	apical	OK	567.464	691.439		0.285073	0.919056	0.1043	0.482237	no
ENSORLG00000002561	ENSORLG00000002561	mpz	chr17:2616420-2629820	medial	apical	OK	14.7027	13.2218		-0.15317	-0.246637	0.6639	0.9231	no
ENSORLG00000002562	ENSORLG00000002562	ehbp1	chr15:12005225-12154109	medial	apical	OK	17.1078	15.3821		-0.153405	-0.472384	0.4075	0.808719	no
ENSORLG00000002563	ENSORLG00000002563	clk2a	chr11:6666840-6677979	medial	apical	NOTEST	0.0330463	0.105011		1.66798	0	1	1	no
ENSORLG00000002564	ENSORLG00000002564	acaa2	chr9:6250600-6261466	medial	apical	OK	47.173	8.7315		-2.43366	-1.33844	0.25835	0.688704	no
ENSORLG00000002565	ENSORLG00000002565	b3gnt2b	chr15:12171226-12172420	medial	apical	OK	1.32502	4.08577		1.6246	1.57263	0.0152	0.163386	no
ENSORLG00000002566	ENSORLG00000002566	slc13a2	chr14:8504305-8516284	medial	apical	OK	4.28728	4.55476		0.0873109	0.16242	0.7788	0.952138	no
ENSORLG00000002567	ENSORLG00000002567	id4	chr16:5727769-5730257	medial	apical	NOTEST	0.550949	0.279724		-0.977917	0	1	1	no
ENSORLG00000002568	ENSORLG00000002568	zc3h7bb	chr19:2074692-2096925	medial	apical	OK	7.6058	8.03528		0.0792471	0.166452	0.76885	0.951539	no
ENSORLG00000002570	ENSORLG00000002570	-	chr15:12194960-12234393	medial	apical	OK	254.224	291.831		0.199033	0.689098	0.23155	0.660407	no
ENSORLG00000002571	ENSORLG00000002571	-	chr1:8151213-8160445	medial	apical	NOTEST	0	0		0	0	1	1	no
ENSORLG00000002572	ENSORLG00000002572	rom1b	chr10:12297564-12301339	medial	apical	NOTEST	1.17865	1.17771		-0.00114625	0	1	1	no
ENSORLG00000002573	ENSORLG00000002573	trim2b	chr18:1484799-1493175	medial	apical	NOTEST	0	0		0	0	1	1	no
ENSORLG00000002574	ENSORLG00000002574	mrpl40	chr9:6250600-6261466	medial	apical	OK	249.912	271.148		0.117661	0.23548	0.68095	0.928197	no
ENSORLG00000002575	ENSORLG00000002575	casp9	chr7:5963697-5967795	medial	apical	NOTEST	0.561892	0.457019		-0.298041	0	1	1	no
ENSORLG00000002577	ENSORLG00000002577	unc119b	chr14:8519483-8536399	medial	apical	OK	7.31828	7.49981		0.0353481	0.0472632	0.95215	0.985844	no
ENSORLG00000002580	ENSORLG00000002580	si:ch211-51h9.6	chr9:6250600-6261466	medial	apical	OK	792.548	969.464		0.29069	0.386755	0.49665	0.854199	no
ENSORLG00000002582	ENSORLG00000002582	tefa	chr19:2074692-2096925	medial	apical	NOTEST	0.464222	0.569621		0.295187	0	1	1	no
ENSORLG00000002583	ENSORLG00000002583	cacna1da	chr5:5201816-5279945	medial	apical	OK	4.78766	5.32974		0.154744	0.288331	0.61565	0.908166	no
ENSORLG00000002584	ENSORLG00000002584	unm_sa808	chr12:4053444-4071426	medial	apical	NOTEST	0.0178814	0		#NAME?	0	1	1	no
ENSORLG00000002585	ENSORLG00000002585	-	chr18:1788747-1794969	medial	apical	OK	15.8508	15.4786		-0.0342786	-0.0895044	0.8781	0.971703	no
ENSORLG00000002587	ENSORLG00000002587	-	chr6:11714981-11756749	medial	apical	OK	7.39876	5.48541		-0.431684	-1.01331	0.07535	0.41049	no
ENSORLG00000002588	ENSORLG00000002588	pdha1b	chr20:2803893-2834744	medial	apical	OK	36.9502	39.3113		0.0893598	0.205701	0.7186	0.937253	no
ENSORLG00000002589	ENSORLG00000002589	ncalda	chr16:5795011-5868378	medial	apical	OK	286.657	261.606		-0.131925	-0.469259	0.41495	0.812176	no
ENSORLG00000002590	ENSORLG00000002590	dnajc16	chr7:5968578-5976796	medial	apical	NOTEST	0.520449	0.314116		-0.728459	0	1	1	no
ENSORLG00000002591	ENSORLG00000002591	phf5a	chr19:2074692-2096925	medial	apical	NOTEST	0	0.578314		inf	0	1	1	no
ENSORLG00000002592	ENSORLG00000002592	-	chr14:8540857-8557347	medial	apical	OK	8.42435	8.73759		0.0526693	0.118096	0.8245	0.960005	no
ENSORLG00000002593	ENSORLG00000002593	ubtf	chr8:4604988-4611553	medial	apical	NOTEST	0.104995	0.168129		0.679254	0	1	1	no
ENSORLG00000002594	ENSORLG00000002594	krt97	chr1:8233659-8238442	medial	apical	NOTEST	0	0		0	0	1	1	no
ENSORLG00000002595	ENSORLG00000002595	-	chr18:1888400-1890910	medial	apical	NOTEST	0.155744	0		#NAME?	0	1	1	no
ENSORLG00000002596	ENSORLG00000002596	bmpr1aa	chr15:12289791-12369944	medial	apical	NOTEST	0	0		0	0	1	1	no
ENSORLG00000002597	ENSORLG00000002597	adck2	chr6:11760563-11768219	medial	apical	OK	23.225	23.4051		0.0111486	0.0322737	0.9588	0.987107	no
ENSORLG00000002600	ENSORLG00000002600	-	chr18:1845287-1878173	medial	apical	NOTEST	0.418794	0		#NAME?	0	1	1	no
ENSORLG00000002601	ENSORLG00000002601	aifm5	chr14:8570965-8592200	medial	apical	OK	4.16121	0		#NAME?	#NAME?	0.12805	0.521891	no
ENSORLG00000002602	ENSORLG00000002602	cers2a	chr11:6697510-6714496	medial	apical	NOTEST	0.15547	0.270279		0.79781	0	1	1	no
ENSORLG00000002603	ENSORLG00000002603	krt222	chr1:8256254-8298253	medial	apical	NOTEST	0	0		0	0	1	1	no
ENSORLG00000002605	ENSORLG00000002605	-	chr8:4615435-4619375	medial	apical	NOTEST	0	0		0	0	1	1	no
ENSORLG00000002606	ENSORLG00000002606	parapinopsinb	chr5:5201816-5279945	medial	apical	OK	6.68871	6.61385		-0.0162367	-0.0323119	0.9533	0.986354	no
ENSORLG00000002608	ENSORLG00000002608	soga1	chr7:5984169-6058810	medial	apical	NOTEST	0.177768	0.41505		1.22329	0	1	1	no
ENSORLG00000002609	ENSORLG00000002609	-	chr18:1825492-1827706	medial	apical	OK	19.6152	27.3837		0.481344	1.0585	0.0675	0.388919	no
ENSORLG00000002610	ENSORLG00000002610	fbxo40.1	chr14:8570965-8592200	medial	apical	OK	9.27176	0.14198		-6.02908	-3.17829	0.22785	0.657041	no
ENSORLG00000002611	ENSORLG00000002611	ufd1l	chr9:6261584-6281529	medial	apical	OK	3.43802	3.77739		0.135812	0.136576	0.80415	0.95705	no
ENSORLG00000002612	ENSORLG00000002612	tmub2	chr8:4620562-4625168	medial	apical	NOTEST	0	0		0	0	1	1	no
ENSORLG00000002613	ENSORLG00000002613	GRHL2	chr16:5870906-5886348	medial	apical	OK	19.1952	17.6526		-0.120864	-0.357817	0.53365	0.869018	no
ENSORLG00000002614	ENSORLG00000002614	FBN1	chr3:12964576-13034727	medial	apical	NOTEST	1.28604	1.36276		0.0836	0	1	1	no
ENSORLG00000002615	ENSORLG00000002615	-	chr18:1967865-2280305	medial	apical	NOTEST	2.67807	2.63056		-0.0258205	0	1	1	no
ENSORLG00000002616	ENSORLG00000002616	cntn5	chr13:6116985-6294968	medial	apical	OK	3.89963	4.91185		0.332931	0.69372	0.22205	0.649369	no
ENSORLG00000002617	ENSORLG00000002617	-	chr18:1967865-2280305	medial	apical	NOTEST	0.161392	0		#NAME?	0	1	1	no
ENSORLG00000002618	ENSORLG00000002618	aco2	chr19:2097648-2109374	medial	apical	NOTEST	0.0862367	0.0378195		-1.18917	0	1	1	no
ENSORLG00000002620	ENSORLG00000002620	asb16	chr8:4630504-4634013	medial	apical	NOTEST	0.100707	0		#NAME?	0	1	1	no
ENSORLG00000002621	ENSORLG00000002621	ZNF706	chr16:5886548-5890554	medial	apical	NOTEST	0.0600447	0		#NAME?	0	1	1	no
ENSORLG00000002622	ENSORLG00000002622	ldb3a	chr15:12289791-12369944	medial	apical	NOTEST	0	0		0	0	1	1	no
ENSORLG00000002623	ENSORLG00000002623	ccr7	chr1:8299357-8317420	medial	apical	NOTEST	0	0		0	0	1	1	no
ENSORLG00000002624	ENSORLG00000002624	SCYL1	chr10:12323341-12335694	medial	apical	OK	58.3816	64.6855		0.147928	0.477743	0.40475	0.808719	no
ENSORLG00000002625	ENSORLG00000002625	SRPK2	chr6:11769531-11841999	medial	apical	OK	202.295	237.114		0.22912	0.811438	0.16015	0.56691	no
ENSORLG00000002626	ENSORLG00000002626	-	chr8:4653286-4653904	medial	apical	NOTEST	0	0		0	0	1	1	no
ENSORLG00000002627	ENSORLG00000002627	zmp:0000000846	chr12:4083089-4141889	medial	apical	NOTEST	0.0357621	0.106431		1.57342	0	1	1	no
ENSORLG00000002628	ENSORLG00000002628	-	chr14:8592705-8598848	medial	apical	NOTEST	0.109273	0		#NAME?	0	1	1	no
ENSORLG00000002630	ENSORLG00000002630	celf3a	chr11:6724147-6750779	medial	apical	NOTEST	0	0		0	0	1	1	no
ENSORLG00000002632	ENSORLG00000002632	-	chr18:1967865-2280305	medial	apical	NOTEST	0	0		0	0	1	1	no
ENSORLG00000002633	ENSORLG00000002633	opn4a	chr15:12381020-12396974	medial	apical	NOTEST	0	0		0	0	1	1	no
ENSORLG00000002634	ENSORLG00000002634	-	chr18:1967865-2280305	medial	apical	NOTEST	1.18475	0.286618		-2.04738	0	1	1	no
ENSORLG00000002635	ENSORLG00000002635	dhx37	chr9:6261584-6281529	medial	apical	OK	8.63819	8.18205		-0.0782663	-0.177851	0.75405	0.947162	no
ENSORLG00000002637	ENSORLG00000002637	acot9.2	chr20:2803893-2834744	medial	apical	OK	7.86221	6.93296		-0.181462	-0.143113	0.80875	0.957626	no
ENSORLG00000002639	ENSORLG00000002639	atp1a2a	chr17:2633441-2690461	medial	apical	NOTEST	0.0189967	0.182539		3.26438	0	1	1	no
ENSORLG00000002642	ENSORLG00000002642	-	chr11:6757110-6770718	medial	apical	NOTEST	0.0248317	0		#NAME?	0	1	1	no
ENSORLG00000002644	ENSORLG00000002644	arhgap42b	chr13:6342526-6452484	medial	apical	NOTEST	1.1425	1.67847		0.554955	0	1	1	no
ENSORLG00000002645	ENSORLG00000002645	rarres3l	chr10:12341584-12343888	medial	apical	NOTEST	0	0		0	0	1	1	no
ENSORLG00000002646	ENSORLG00000002646	-	chr16:5894515-5902958	medial	apical	NOTEST	0	0		0	0	1	1	no
ENSORLG00000002648	ENSORLG00000002648	osbpl2b	chr7:6063664-6090584	medial	apical	NOTEST	0.759261	1.29208		0.767032	0	1	1	no
ENSORLG00000002649	ENSORLG00000002649	-	chr18:3519108-3523327	medial	apical	NOTEST	0	0.0718215		inf	0	1	1	no
ENSORLG00000002650	ENSORLG00000002650	ciarta	chr11:6771013-6776388	medial	apical	NOTEST	0.817322	0.314654		-1.37714	0	1	1	no
ENSORLG00000002651	ENSORLG00000002651	pgr	chr13:6453898-6461021	medial	apical	NOTEST	1.14322	0.923734		-0.307557	0	1	1	no
ENSORLG00000002652	ENSORLG00000002652	-	chr19:2153229-2155290	medial	apical	OK	15.9265	13.8846		-0.197947	-0.477451	0.40345	0.80827	no
ENSORLG00000002653	ENSORLG00000002653	-	chr18:23407875-23415018	medial	apical	NOTEST	0	0		0	0	1	1	no
ENSORLG00000002654	ENSORLG00000002654	SMARCE1 (1 of many)	chr1:8299357-8317420	medial	apical	NOTEST	0	0		0	0	1	1	no
ENSORLG00000002656	ENSORLG00000002656	pus7	chr6:11845055-11858024	medial	apical	NOTEST	1.88188	2.49279		0.405588	0	1	1	no
ENSORLG00000002658	ENSORLG00000002658	dcxr	chr19:23028136-23036693	medial	apical	NOTEST	0	0		0	0	1	1	no
ENSORLG00000002659	ENSORLG00000002659	ints5	chr10:12346612-12367126	medial	apical	NOTEST	0	0.0952026		inf	0	1	1	no
ENSORLG00000002661	ENSORLG00000002661	IGFBP4	chr1:8333521-8351371	medial	apical	NOTEST	0	0		0	0	1	1	no
ENSORLG00000002662	ENSORLG00000002662	alx1	chr6:2002022-2005673	medial	apical	OK	12.3906	14.9769		0.273495	0.482527	0.40275	0.807755	no
ENSORLG00000002663	ENSORLG00000002663	zgc:172339	chr6:11845055-11858024	medial	apical	NOTEST	0	0.160253		inf	0	1	1	no
ENSORLG00000002664	ENSORLG00000002664	sat1b	chr20:2836816-2840898	medial	apical	OK	3.0557	3.86907		0.340481	0.592318	0.2995	0.733225	no
ENSORLG00000002665	ENSORLG00000002665	-	chr18:3002501-3004193	medial	apical	NOTEST	0	0		0	0	1	1	no
ENSORLG00000002666	ENSORLG00000002666	aplnr2	chr6:11859979-11861398	medial	apical	OK	15.0977	28.895	43.9927	0.936496	2.1526	0.00035	0.0111665	yes
ENSORLG00000002669	ENSORLG00000002669	zgc:63587	chr9:6323551-6343551	medial	apical	OK	14.1187	16.849		0.255055	0.495403	0.38265	0.791153	no
ENSORLG00000002670	ENSORLG00000002670	pik3r1	chr12:4183757-4200078	medial	apical	NOTEST	0.0346534	0		#NAME?	0	1	1	no
ENSORLG00000002671	ENSORLG00000002671	lmnb2	chr4:5402025-5411100	medial	apical	NOTEST	0.0164252	0.0255356		0.636597	0	1	1	no
ENSORLG00000002672	ENSORLG00000002672	rnf150b	chr18:3009805-3017832	medial	apical	NOTEST	0.086385	0.194638		1.17194	0	1	1	no
ENSORLG00000002673	ENSORLG00000002673	sdhc	chr17:2694187-2700733	medial	apical	NOTEST	0	0.167917		inf	0	1	1	no
ENSORLG00000002674	ENSORLG00000002674	-	chr1:8366324-8377133	medial	apical	NOTEST	0	0		0	0	1	1	no
ENSORLG00000002677	ENSORLG00000002677	rac3b	chr19:23040128-23043488	medial	apical	OK	7.14303	6.61355		-0.111111	-0.129225	0.826	0.960005	no
ENSORLG00000002678	ENSORLG00000002678	-	chr15:12441116-12447071	medial	apical	NOTEST	0	0		0	0	1	1	no
ENSORLG00000002679	ENSORLG00000002679	cluhb	chr14:8608546-8624322	medial	apical	NOTEST	0.781211	0.518178		-0.592265	0	1	1	no
ENSORLG00000002680	ENSORLG00000002680	-	chr11:6813973-6815631	medial	apical	NOTEST	0	0		0	0	1	1	no
ENSORLG00000002681	ENSORLG00000002681	cacna2d3	chr5:5285535-5321048	medial	apical	OK	35.4035	33.6787		-0.0720553	-0.225566	0.6916	0.928641	no
ENSORLG00000002682	ENSORLG00000002682	slc12a1	chr3:13034922-13047709	medial	apical	OK	47.791	40.067		-0.254323	-0.843899	0.14035	0.540513	no
ENSORLG00000002683	ENSORLG00000002683	-	chr20:2895867-2900561	medial	apical	OK	4.01557	6.81071		0.762202	1.51684	0.0102	0.125884	no
ENSORLG00000002686	ENSORLG00000002686	-	chr7:6100544-6214422	medial	apical	OK	20.3138	22.821		0.167902	0.574014	0.3091	0.743557	no
ENSORLG00000002687	ENSORLG00000002687	-	chr15:12491224-12501311	medial	apical	NOTEST	0.114115	0		#NAME?	0	1	1	no
ENSORLG00000002688	ENSORLG00000002688	-	chr11:6846871-6925450	medial	apical	NOTEST	0.435619	0.687168		0.657595	0	1	1	no
ENSORLG00000002690	ENSORLG00000002690	trpc6b	chr13:6466258-6476274	medial	apical	NOTEST	0.0660042	0.069444		0.073293	0	1	1	no
ENSORLG00000002691	ENSORLG00000002691	pabpc1a	chr16:5906817-5912751	medial	apical	NOTEST	0.702531	0.594768		-0.240236	0	1	1	no
ENSORLG00000002692	ENSORLG00000002692	APOO	chr20:2965522-2972146	medial	apical	NOTEST	1.07802	1.48828		0.465264	0	1	1	no
ENSORLG00000002693	ENSORLG00000002693	rpl36	chr4:5426124-5434262	medial	apical	NOTEST	0	0		0	0	1	1	no
ENSORLG00000002696	ENSORLG00000002696	lrrc45	chr19:23052698-23062329	medial	apical	OK	7.62452	10.9344		0.520152	1.27038	0.0296	0.247074	no
ENSORLG00000002697	ENSORLG00000002697	-	chr11:6796562-6799729	medial	apical	NOTEST	0	0		0	0	1	1	no
ENSORLG00000002699	ENSORLG00000002699	kirrel1b	chr17:2887390-2927447	medial	apical	NOTEST	1.02864	1.40372		0.44852	0	1	1	no
ENSORLG00000002700	ENSORLG00000002700	-	chr12:4271459-4292493	medial	apical	NOTEST	0.989322	1.57622		0.671952	0	1	1	no
ENSORLG00000002701	ENSORLG00000002701	si:ch211-149b19.3	chr18:3031488-3037303	medial	apical	NOTEST	0	0		0	0	1	1	no
ENSORLG00000002702	ENSORLG00000002702	MLLT6	chr1:8380076-8402408	medial	apical	NOTEST	0	0		0	0	1	1	no
ENSORLG00000002703	ENSORLG00000002703	-	chr11:6800447-6801521	medial	apical	NOTEST	0	0		0	0	1	1	no
ENSORLG00000002705	ENSORLG00000002705	tmcc1b	chr5:5378226-5397903	medial	apical	OK	2.70951	4.91787		0.860002	1.678	0.00455	0.0737592	no
ENSORLG00000002707	ENSORLG00000002707	rnf19a	chr16:5914760-5935463	medial	apical	NOTEST	0.653316	0.941649		0.527408	0	1	1	no
ENSORLG00000002708	ENSORLG00000002708	yap1	chr13:6489829-6520721	medial	apical	OK	31.5185	33.7324		0.0979354	0.311997	0.5788	0.891461	no
ENSORLG00000002711	ENSORLG00000002711	-	chr12:4422084-4495396	medial	apical	NOTEST	3.52697	0.701106		-2.33073	0	1	1	no
ENSORLG00000002713	ENSORLG00000002713	olgc6	chr19:2276345-2386362	medial	apical	NOTEST	0	0		0	0	1	1	no
ENSORLG00000002714	ENSORLG00000002714	-	chr7:6236880-6283430	medial	apical	NOTEST	0.102474	0.136027		0.408635	0	1	1	no
ENSORLG00000002715	ENSORLG00000002715	parvb	chr6:11867284-11882323	medial	apical	NOTEST	0.366469	0.785645		1.10019	0	1	1	no
ENSORLG00000002716	ENSORLG00000002716	eif2s3	chr20:2983823-3005956	medial	apical	OK	81.9042	86.1586		0.0730574	0.100125	0.856	0.968002	no
ENSORLG00000002717	ENSORLG00000002717	KCNJ10	chr17:2999930-3007869	medial	apical	OK	5.61103	7.95735		0.504021	0.823251	0.15045	0.557063	no
ENSORLG00000002718	ENSORLG00000002718	pafah1b1b	chr14:8637721-8644012	medial	apical	OK	59.7046	57.5722		-0.0524682	-0.172159	0.7657	0.950583	no
ENSORLG00000002720	ENSORLG00000002720	-	chr5:5400290-5405320	medial	apical	NOTEST	0.480216	0.399192		-0.266601	0	1	1	no
ENSORLG00000002721	ENSORLG00000002721	ganab	chr10:12346612-12367126	medial	apical	NOTEST	0	0		0	0	1	1	no
ENSORLG00000002722	ENSORLG00000002722	LRRC31	chr20:2983823-3005956	medial	apical	OK	26.4748	27.2421		0.0412204	0.0307219	0.9564	0.98699	no
ENSORLG00000002724	ENSORLG00000002724	cdc45	chr9:6357253-6364920	medial	apical	NOTEST	0.524491	0.700282		0.417017	0	1	1	no
ENSORLG00000002726	ENSORLG00000002726	shisal1b	chr6:11911701-11933003	medial	apical	NOTEST	0.27216	0.331803		0.285873	0	1	1	no
ENSORLG00000002727	ENSORLG00000002727	ninl	chr15:12507552-12526938	medial	apical	NOTEST	0.0780623	0.290138		1.89404	0	1	1	no
ENSORLG00000002728	ENSORLG00000002728	tmem115	chr7:6284741-6291945	medial	apical	NOTEST	0.0456772	0		#NAME?	0	1	1	no
ENSORLG00000002730	ENSORLG00000002730	myef2	chr3:13060426-13079918	medial	apical	NOTEST	0.0591664	0.0202386		-1.54767	0	1	1	no
ENSORLG00000002731	ENSORLG00000002731	erbin	chr12:4422084-4495396	medial	apical	OK	15.6036	18.4776		0.2439	0.754056	0.18635	0.604965	no
ENSORLG00000002734	ENSORLG00000002734	mntb	chr14:8646622-8684097	medial	apical	OK	65.4669	57.3751		-0.190341	-0.526445	0.3511	0.767722	no
ENSORLG00000002735	ENSORLG00000002735	abcg2a	chr18:3043218-3060178	medial	apical	NOTEST	0	0.0466462		inf	0	1	1	no
ENSORLG00000002736	ENSORLG00000002736	-	chr2:15119808-15133091	medial	apical	NOTEST	0.324767	0.533394		0.715798	0	1	1	no
ENSORLG00000002737	ENSORLG00000002737	pnp5b	chr17:3023791-3032150	medial	apical	NOTEST	1.39832	1.70658		0.28741	0	1	1	no
ENSORLG00000002738	ENSORLG00000002738	gab2	chr13:6584001-6627180	medial	apical	NOTEST	1.72241	1.4292		-0.269216	0	1	1	no
ENSORLG00000002740	ENSORLG00000002740	qrich1	chr5:5411760-5427546	medial	apical	NOTEST	0	0		0	0	1	1	no
ENSORLG00000002741	ENSORLG00000002741	lrrc34	chr20:2983823-3005956	medial	apical	OK	157.055	227.483		0.534493	1.66346	0.0037	0.0641405	no
ENSORLG00000002742	ENSORLG00000002742	-	chr7:13129633-13144809	medial	apical	NOTEST	0	0		0	0	1	1	no
ENSORLG00000002743	ENSORLG00000002743	-	chr16:5940333-5956235	medial	apical	NOTEST	0.362032	0		#NAME?	0	1	1	no
ENSORLG00000002744	ENSORLG00000002744	si:ch211-114c17.1	chr10:12368030-12375557	medial	apical	NOTEST	0	0		0	0	1	1	no
ENSORLG00000002745	ENSORLG00000002745	si:ch73-139e5.2	chr19:2276345-2386362	medial	apical	OK	57.9402	52.5799		-0.140052	-0.355433	0.5399	0.870056	no
ENSORLG00000002746	ENSORLG00000002746	-	chr17:3036605-3065929	medial	apical	OK	33.5391	29.6168		-0.179424	-0.501662	0.3556	0.771326	no
ENSORLG00000002747	ENSORLG00000002747	plpp5	chr9:6366418-6372432	medial	apical	NOTEST	0.664117	0.660611		-0.00763819	0	1	1	no
ENSORLG00000002748	ENSORLG00000002748	txk	chr18:3074362-3114212	medial	apical	NOTEST	0	0		0	0	1	1	no
ENSORLG00000002750	ENSORLG00000002750	rpusd4	chr5:5411760-5427546	medial	apical	NOTEST	0	0		0	0	1	1	no
ENSORLG00000002751	ENSORLG00000002751	-	chr17:3080982-3083144	medial	apical	NOTEST	0	0		0	0	1	1	no
ENSORLG00000002753	ENSORLG00000002753	phb2b	chr4:5434960-5441902	medial	apical	NOTEST	0.321658	0.365812		0.185574	0	1	1	no
ENSORLG00000002756	ENSORLG00000002756	gins1	chr15:12527888-12530393	medial	apical	NOTEST	0.256372	0.282606		0.140555	0	1	1	no
ENSORLG00000002759	ENSORLG00000002759	FBXO43	chr16:5964011-5968768	medial	apical	NOTEST	1.25786	0.884942		-0.507322	0	1	1	no
ENSORLG00000002760	ENSORLG00000002760	slc24a5	chr3:13060426-13079918	medial	apical	OK	7.52694	8.36743		0.152722	0.307541	0.58465	0.893587	no
ENSORLG00000002763	ENSORLG00000002763	-	chr16:5977926-5981572	medial	apical	OK	53.7147	61.3753		0.192342	0.538364	0.3446	0.764108	no
ENSORLG00000002764	ENSORLG00000002764	si:dkeyp-86f7.4	chr3:13060426-13079918	medial	apical	NOTEST	1.718	1.64207		-0.0652192	0	1	1	no
ENSORLG00000002766	ENSORLG00000002766	sept4a	chr14:8646622-8684097	medial	apical	OK	9.67521	12.9549		0.421128	0.291005	0.6123	0.907452	no
ENSORLG00000002768	ENSORLG00000002768	asic2	chr8:4844475-4967555	medial	apical	NOTEST	0.106412	0		#NAME?	0	1	1	no
ENSORLG00000002769	ENSORLG00000002769	tesk2	chr17:3091171-3143993	medial	apical	OK	5.72754	4.58268		-0.321724	-0.228899	0.6929	0.928641	no
ENSORLG00000002770	ENSORLG00000002770	nln	chr12:4496228-4529064	medial	apical	OK	27.8347	35.8556		0.365315	0.846558	0.1449	0.547832	no
ENSORLG00000002778	ENSORLG00000002778	nars2	chr13:6627200-6637946	medial	apical	NOTEST	0.0662731	0.104414		0.655822	0	1	1	no
ENSORLG00000002779	ENSORLG00000002779	ubxn1	chr10:12375914-12384052	medial	apical	NOTEST	0.613469	0		#NAME?	0	1	1	no
ENSORLG00000002780	ENSORLG00000002780	abhd12	chr15:12537250-12551445	medial	apical	NOTEST	0.200818	0.398461		0.988553	0	1	1	no
ENSORLG00000002782	ENSORLG00000002782	GCG (1 of many)	chr2:15135487-15137771	medial	apical	OK	8.00445	14.773		0.884088	1.24768	0.0348	0.268291	no
ENSORLG00000002783	ENSORLG00000002783	-	chr11:7021458-7022964	medial	apical	NOTEST	0	0		0	0	1	1	no
ENSORLG00000002784	ENSORLG00000002784	commd2	chr4:5441978-5482068	medial	apical	NOTEST	0	0		0	0	1	1	no
ENSORLG00000002785	ENSORLG00000002785	si:ch211-141o9.10	chr19:2276345-2386362	medial	apical	NOTEST	0	0		0	0	1	1	no
ENSORLG00000002788	ENSORLG00000002788	tec	chr18:3074362-3114212	medial	apical	OK	46.2711	42.9436		-0.107667	-0.351161	0.54115	0.871127	no
ENSORLG00000002789	ENSORLG00000002789	limk1b	chr14:8646622-8684097	medial	apical	OK	32.0643	36.5829		0.190201	0.209834	0.70475	0.931585	no
ENSORLG00000002792	ENSORLG00000002792	pld1b	chr20:3030839-3072913	medial	apical	NOTEST	1.69496	1.49713		-0.179051	0	1	1	no
ENSORLG00000002793	ENSORLG00000002793	mpp3a	chr8:4997858-5020601	medial	apical	OK	8.11046	6.88864		-0.235565	-0.44099	0.4288	0.819035	no
ENSORLG00000002794	ENSORLG00000002794	-	chr19:2276345-2386362	medial	apical	NOTEST	0.0139737	0		#NAME?	0	1	1	no
ENSORLG00000002795	ENSORLG00000002795	mrps17	chr14:8719241-8721114	medial	apical	NOTEST	0	0		0	0	1	1	no
ENSORLG00000002796	ENSORLG00000002796	spag1a	chr11:7024509-7036185	medial	apical	NOTEST	0.340196	0		#NAME?	0	1	1	no
ENSORLG00000002797	ENSORLG00000002797	osr2	chr16:6304802-6311361	medial	apical	OK	257.181	252.24		-0.0279877	-0.0972324	0.86665	0.969742	no
ENSORLG00000002799	ENSORLG00000002799	znf281a	chr8:5054954-5064575	medial	apical	NOTEST	0.0509825	0.0915459		0.844493	0	1	1	no
[truncated: 22,366 more rows]
