# Supplementary material for: Stem cell topography splits growth and homeostatic functions in the fish gill
Source: eLife. 2019 May 16;8:e43747. doi: 10.7554/eLife.43747 (PMC6534379; doi:10.7554/eLife.43747)
Supplement: Supplementary file 2. — The table represents simulated values of recombination (0 = unlabelled; 1 = labelled) in five gills, according to the ‘stem cell’ model described in M and M. The labelling efficiency was calculated from real data from 5 GaudíUbiq.iCre GaudíRSG recombined gills. [file elife-43747-supp2.xlsx]

## Sheet: Sheet 1 - Simulation    Stem Ce
Simulation Stem Cells
Gill 1
0.	0.	0.	0.	0.	0.
0.	0.	0.	0.	0.	0.
0.	0.	0.	0.	0.	0.
1.	1.	1.	1.	1.	1.
0.	0.	0.	0.	0.	0.
0.	0.	0.	0.	0.	0.
0.	0.	0.	0.	0.	0.
0.	0.	0.	0.	0.	0.
0.	0.	0.	0.	0.	0.
1.	1.	1.	1.	1.	1.
0.	0.	0.	0.	0.	0.
0.	0.	0.	0.	0.	0.
0.	0.	0.	0.	0.	0.
0.	0.	0.	0.	0.	0.
0.	0.	0.	0.	0.	0.
0.	0.	0.	0.	0.	0.
0.	0.	0.	0.	0.	0.
1.	1.	1.	1.	1.	1.
0.	0.	0.	0.	0.	0.
0.	0.	0.	0.	0.	0.
0.	0.	0.	0.	0.	0.
1.	1.	1.	1.	1.	1.
0.	0.	0.	0.	0.	0.
0.	0.	0.	0.	0.	0.
0.	0.	0.	0.	0.	0.
0.	0.	0.	0.	0.	0.
0.	0.	0.	0.	0.	0.
0.	0.	0.	0.	0.	0.
0.	0.	0.	0.	0.	0.
0.	0.	0.	0.	0.	0.
0.	0.	0.	0.	0.	0.
0.	0.	0.	0.	0.	0.
1.	1.	1.	1.	1.	1.
1.	1.	1.	1.	1.	1.
0.	0.	0.	0.	0.	0.
0.	0.	0.	0.	0.	0.
1.	1.	1.	1.	1.	1.
0.	0.	0.	0.	0.	0.
0.	0.	0.	0.	0.	0.
0.	0.	0.	0.	0.	0.
0.	0.	0.	0.	0.	0.
1.	1.	1.	1.	1.	1.
0.	0.	0.	0.	0.	0.
0.	0.	0.	0.	0.	0.
0.	0.	0.	0.	0.	0.
0.	0.	0.	0.	0.	0.
0.	0.	0.	0.	0.	0.
0.	0.	0.	0.	0.	0.
0.	0.	0.	0.	0.	0.
0.	0.	0.	0.	0.	0.
1.	1.	1.	1.	1.	1.
0.	0.	0.	0.	0.	0.
1.	1.	1.	1.	1.	1.
0.	0.	0.	0.	0.	0.
0.	0.	0.	0.	0.	0.
0.	0.	0.	0.	0.	0.
0.	0.	0.	0.	0.	0.
0.	0.	0.	0.	0.	0.
0.	0.	0.	0.	0.	0.
1.	1.	1.	1.	1.	1.
1.	1.	1.	1.	1.	1.
0.	0.	0.	0.	0.	0.
0.	0.	0.	0.	0.	0.
0.	0.	0.	0.	0.	0.
0.	0.	0.	0.	0.	0.
1.	1.	1.	1.	1.	1.
0.	0.	0.	0.	0.	0.
1.	1.	1.	1.	1.	1.
0.	0.	0.	0.	0.	0.
1.	1.	1.	1.	1.	1.
0.	0.	0.	0.	0.	0.
0.	0.	0.	0.	0.	0.
0.	0.	0.	0.	0.	0.
1.	1.	1.	1.	1.	1.
0.	0.	0.	0.	0.	0.
0.	0.	0.	0.	0.	0.
0.	0.	0.	0.	0.	0.
0.	0.	0.	0.	0.	0.
0.	0.	0.	0.	0.	0.
1.	1.	1.	1.	1.	1.
0.	0.	0.	0.	0.	0.
0.	0.	0.	0.	0.	0.
1.	1.	1.	1.	1.	1.
0.	0.	0.	0.	0.	0.
1.	1.	1.	1.	1.	1.
1.	1.	1.	1.	1.	1.
0.	0.	0.	0.	0.	0.
1.	1.	1.	1.	1.	1.
0.	0.	0.	0.	0.	0.
0.	0.	0.	0.	0.	0.
0.	0.	0.	0.	0.	0.
0.	0.	0.	0.	0.	0.
0.	0.	0.	0.	0.	0.
1.	1.	1.	1.	1.	1.
1.	1.	1.	1.	1.	1.
0.	0.	0.	0.	0.	0.
0.	0.	0.	0.	0.	0.
0.	0.	0.	0.	0.	0.
0.	0.	0.	0.	0.	0.
0.	0.	0.	0.	0.	0.
Gill 2
1.	1.	1.	1.	1.	1.
0.	0.	0.	0.	0.	0.
1.	1.	1.	1.	1.	1.
1.	1.	1.	1.	1.	1.
1.	1.	1.	1.	1.	1.
0.	0.	0.	0.	0.	0.
0.	0.	0.	0.	0.	0.
0.	0.	0.	0.	0.	0.
1.	1.	1.	1.	1.	1.
0.	0.	0.	0.	0.	0.
0.	0.	0.	0.	0.	0.
0.	0.	0.	0.	0.	0.
1.	1.	1.	1.	1.	1.
1.	1.	1.	1.	1.	1.
0.	0.	0.	0.	0.	0.
0.	0.	0.	0.	0.	0.
0.	0.	0.	0.	0.	0.
0.	0.	0.	0.	0.	0.
0.	0.	0.	0.	0.	0.
0.	0.	0.	0.	0.	0.
1.	1.	1.	1.	1.	1.
0.	0.	0.	0.	0.	0.
1.	1.	1.	1.	1.	1.
1.	1.	1.	1.	1.	1.
0.	0.	0.	0.	0.	0.
0.	0.	0.	0.	0.	0.
1.	1.	1.	1.	1.	1.
0.	0.	0.	0.	0.	0.
0.	0.	0.	0.	0.	0.
0.	0.	0.	0.	0.	0.
0.	0.	0.	0.	0.	0.
0.	0.	0.	0.	0.	0.
1.	1.	1.	1.	1.	1.
1.	1.	1.	1.	1.	1.
0.	0.	0.	0.	0.	0.
0.	0.	0.	0.	0.	0.
0.	0.	0.	0.	0.	0.
1.	1.	1.	1.	1.	1.
0.	0.	0.	0.	0.	0.
1.	1.	1.	1.	1.	1.
1.	1.	1.	1.	1.	1.
0.	0.	0.	0.	0.	0.
1.	1.	1.	1.	1.	1.
1.	1.	1.	1.	1.	1.
0.	0.	0.	0.	0.	0.
0.	0.	0.	0.	0.	0.
1.	1.	1.	1.	1.	1.
1.	1.	1.	1.	1.	1.
0.	0.	0.	0.	0.	0.
0.	0.	0.	0.	0.	0.
0.	0.	0.	0.	0.	0.
0.	0.	0.	0.	0.	0.
0.	0.	0.	0.	0.	0.
0.	0.	0.	0.	0.	0.
0.	0.	0.	0.	0.	0.
0.	0.	0.	0.	0.	0.
0.	0.	0.	0.	0.	0.
0.	0.	0.	0.	0.	0.
0.	0.	0.	0.	0.	0.
0.	0.	0.	0.	0.	0.
1.	1.	1.	1.	1.	1.
0.	0.	0.	0.	0.	0.
1.	1.	1.	1.	1.	1.
0.	0.	0.	0.	0.	0.
0.	0.	0.	0.	0.	0.
1.	1.	1.	1.	1.	1.
0.	0.	0.	0.	0.	0.
0.	0.	0.	0.	0.	0.
1.	1.	1.	1.	1.	1.
0.	0.	0.	0.	0.	0.
1.	1.	1.	1.	1.	1.
0.	0.	0.	0.	0.	0.
0.	0.	0.	0.	0.	0.
1.	1.	1.	1.	1.	1.
0.	0.	0.	0.	0.	0.
0.	0.	0.	0.	0.	0.
0.	0.	0.	0.	0.	0.
0.	0.	0.	0.	0.	0.
0.	0.	0.	0.	0.	0.
0.	0.	0.	0.	0.	0.
1.	1.	1.	1.	1.	1.
1.	1.	1.	1.	1.	1.
0.	0.	0.	0.	0.	0.
0.	0.	0.	0.	0.	0.
0.	0.	0.	0.	0.	0.
1.	1.	1.	1.	1.	1.
0.	0.	0.	0.	0.	0.
1.	1.	1.	1.	1.	1.
0.	0.	0.	0.	0.	0.
0.	0.	0.	0.	0.	0.
0.	0.	0.	0.	0.	0.
0.	0.	0.	0.	0.	0.
0.	0.	0.	0.	0.	0.
0.	0.	0.	0.	0.	0.
1.	1.	1.	1.	1.	1.
0.	0.	0.	0.	0.	0.
0.	0.	0.	0.	0.	0.
0.	0.	0.	0.	0.	0.
0.	0.	0.	0.	0.	0.
1.	1.	1.	1.	1.	1.
Gill 5
0.	0.	0.	0.	0.	0.
1.	1.	1.	1.	1.	1.
1.	1.	1.	1.	1.	1.
0.	0.	0.	0.	0.	0.
0.	0.	0.	0.	0.	0.
1.	1.	1.	1.	1.	1.
1.	1.	1.	1.	1.	1.
0.	0.	0.	0.	0.	0.
0.	0.	0.	0.	0.	0.
1.	1.	1.	1.	1.	1.
0.	0.	0.	0.	0.	0.
0.	0.	0.	0.	0.	0.
0.	0.	0.	0.	0.	0.
1.	1.	1.	1.	1.	1.
1.	1.	1.	1.	1.	1.
0.	0.	0.	0.	0.	0.
0.	0.	0.	0.	0.	0.
1.	1.	1.	1.	1.	1.
0.	0.	0.	0.	0.	0.
1.	1.	1.	1.	1.	1.
0.	0.	0.	0.	0.	0.
1.	1.	1.	1.	1.	1.
0.	0.	0.	0.	0.	0.
0.	0.	0.	0.	0.	0.
0.	0.	0.	0.	0.	0.
1.	1.	1.	1.	1.	1.
0.	0.	0.	0.	0.	0.
0.	0.	0.	0.	0.	0.
0.	0.	0.	0.	0.	0.
1.	1.	1.	1.	1.	1.
0.	0.	0.	0.	0.	0.
0.	0.	0.	0.	0.	0.
1.	1.	1.	1.	1.	1.
1.	1.	1.	1.	1.	1.
0.	0.	0.	0.	0.	0.
0.	0.	0.	0.	0.	0.
0.	0.	0.	0.	0.	0.
1.	1.	1.	1.	1.	1.
1.	1.	1.	1.	1.	1.
1.	1.	1.	1.	1.	1.
1.	1.	1.	1.	1.	1.
0.	0.	0.	0.	0.	0.
0.	0.	0.	0.	0.	0.
0.	0.	0.	0.	0.	0.
0.	0.	0.	0.	0.	0.
1.	1.	1.	1.	1.	1.
0.	0.	0.	0.	0.	0.
0.	0.	0.	0.	0.	0.
0.	0.	0.	0.	0.	0.
0.	0.	0.	0.	0.	0.
0.	0.	0.	0.	0.	0.
1.	1.	1.	1.	1.	1.
0.	0.	0.	0.	0.	0.
1.	1.	1.	1.	1.	1.
0.	0.	0.	0.	0.	0.
1.	1.	1.	1.	1.	1.
0.	0.	0.	0.	0.	0.
1.	1.	1.	1.	1.	1.
0.	0.	0.	0.	0.	0.
0.	0.	0.	0.	0.	0.
0.	0.	0.	0.	0.	0.
0.	0.	0.	0.	0.	0.
1.	1.	1.	1.	1.	1.
0.	0.	0.	0.	0.	0.
0.	0.	0.	0.	0.	0.
1.	1.	1.	1.	1.	1.
0.	0.	0.	0.	0.	0.
0.	0.	0.	0.	0.	0.
0.	0.	0.	0.	0.	0.
1.	1.	1.	1.	1.	1.
1.	1.	1.	1.	1.	1.
0.	0.	0.	0.	0.	0.
0.	0.	0.	0.	0.	0.
1.	1.	1.	1.	1.	1.
1.	1.	1.	1.	1.	1.
1.	1.	1.	1.	1.	1.
0.	0.	0.	0.	0.	0.
0.	0.	0.	0.	0.	0.
1.	1.	1.	1.	1.	1.
1.	1.	1.	1.	1.	1.
0.	0.	0.	0.	0.	0.
0.	0.	0.	0.	0.	0.
0.	0.	0.	0.	0.	0.
0.	0.	0.	0.	0.	0.
0.	0.	0.	0.	0.	0.
0.	0.	0.	0.	0.	0.
0.	0.	0.	0.	0.	0.
0.	0.	0.	0.	0.	0.
0.	0.	0.	0.	0.	0.
1.	1.	1.	1.	1.	1.
0.	0.	0.	0.	0.	0.
0.	0.	0.	0.	0.	0.
1.	1.	1.	1.	1.	1.
0.	0.	0.	0.	0.	0.
0.	0.	0.	0.	0.	0.
1.	1.	1.	1.	1.	1.
0.	0.	0.	0.	0.	0.
0.	0.	0.	0.	0.	0.
1.	1.	1.	1.	1.	1.
0.	0.	0.	0.	0.	0.
Gill 13
0.	0.	0.	0.	0.	0.
0.	0.	0.	0.	0.	0.
1.	1.	1.	1.	1.	1.
0.	0.	0.	0.	0.	0.
0.	0.	0.	0.	0.	0.
0.	0.	0.	0.	0.	0.
0.	0.	0.	0.	0.	0.
0.	0.	0.	0.	0.	0.
0.	0.	0.	0.	0.	0.
0.	0.	0.	0.	0.	0.
0.	0.	0.	0.	0.	0.
0.	0.	0.	0.	0.	0.
0.	0.	0.	0.	0.	0.
0.	0.	0.	0.	0.	0.
1.	1.	1.	1.	1.	1.
0.	0.	0.	0.	0.	0.
0.	0.	0.	0.	0.	0.
0.	0.	0.	0.	0.	0.
0.	0.	0.	0.	0.	0.
0.	0.	0.	0.	0.	0.
0.	0.	0.	0.	0.	0.
0.	0.	0.	0.	0.	0.
0.	0.	0.	0.	0.	0.
0.	0.	0.	0.	0.	0.
1.	1.	1.	1.	1.	1.
0.	0.	0.	0.	0.	0.
1.	1.	1.	1.	1.	1.
0.	0.	0.	0.	0.	0.
0.	0.	0.	0.	0.	0.
0.	0.	0.	0.	0.	0.
0.	0.	0.	0.	0.	0.
0.	0.	0.	0.	0.	0.
1.	1.	1.	1.	1.	1.
0.	0.	0.	0.	0.	0.
0.	0.	0.	0.	0.	0.
1.	1.	1.	1.	1.	1.
1.	1.	1.	1.	1.	1.
0.	0.	0.	0.	0.	0.
1.	1.	1.	1.	1.	1.
0.	0.	0.	0.	0.	0.
1.	1.	1.	1.	1.	1.
0.	0.	0.	0.	0.	0.
0.	0.	0.	0.	0.	0.
1.	1.	1.	1.	1.	1.
0.	0.	0.	0.	0.	0.
1.	1.	1.	1.	1.	1.
1.	1.	1.	1.	1.	1.
1.	1.	1.	1.	1.	1.
0.	0.	0.	0.	0.	0.
0.	0.	0.	0.	0.	0.
0.	0.	0.	0.	0.	0.
0.	0.	0.	0.	0.	0.
0.	0.	0.	0.	0.	0.
0.	0.	0.	0.	0.	0.
0.	0.	0.	0.	0.	0.
0.	0.	0.	0.	0.	0.
1.	1.	1.	1.	1.	1.
0.	0.	0.	0.	0.	0.
0.	0.	0.	0.	0.	0.
0.	0.	0.	0.	0.	0.
0.	0.	0.	0.	0.	0.
0.	0.	0.	0.	0.	0.
0.	0.	0.	0.	0.	0.
0.	0.	0.	0.	0.	0.
0.	0.	0.	0.	0.	0.
0.	0.	0.	0.	0.	0.
0.	0.	0.	0.	0.	0.
1.	1.	1.	1.	1.	1.
0.	0.	0.	0.	0.	0.
1.	1.	1.	1.	1.	1.
1.	1.	1.	1.	1.	1.
0.	0.	0.	0.	0.	0.
1.	1.	1.	1.	1.	1.
1.	1.	1.	1.	1.	1.
0.	0.	0.	0.	0.	0.
1.	1.	1.	1.	1.	1.
1.	1.	1.	1.	1.	1.
0.	0.	0.	0.	0.	0.
0.	0.	0.	0.	0.	0.
0.	0.	0.	0.	0.	0.
0.	0.	0.	0.	0.	0.
0.	0.	0.	0.	0.	0.
0.	0.	0.	0.	0.	0.
1.	1.	1.	1.	1.	1.
0.	0.	0.	0.	0.	0.
1.	1.	1.	1.	1.	1.
0.	0.	0.	0.	0.	0.
1.	1.	1.	1.	1.	1.
0.	0.	0.	0.	0.	0.
0.	0.	0.	0.	0.	0.
0.	0.	0.	0.	0.	0.
0.	0.	0.	0.	0.	0.
0.	0.	0.	0.	0.	0.
0.	0.	0.	0.	0.	0.
1.	1.	1.	1.	1.	1.
0.	0.	0.	0.	0.	0.
0.	0.	0.	0.	0.	0.
0.	0.	0.	0.	0.	0.
1.	1.	1.	1.	1.	1.
1.	1.	1.	1.	1.	1.
Gill 14
0.	0.	0.	0.	0.	0.
1.	1.	1.	1.	1.	1.
0.	0.	0.	0.	0.	0.
0.	0.	0.	0.	0.	0.
0.	0.	0.	0.	0.	0.
1.	1.	1.	1.	1.	1.
1.	1.	1.	1.	1.	1.
0.	0.	0.	0.	0.	0.
0.	0.	0.	0.	0.	0.
1.	1.	1.	1.	1.	1.
1.	1.	1.	1.	1.	1.
0.	0.	0.	0.	0.	0.
0.	0.	0.	0.	0.	0.
0.	0.	0.	0.	0.	0.
0.	0.	0.	0.	0.	0.
0.	0.	0.	0.	0.	0.
1.	1.	1.	1.	1.	1.
1.	1.	1.	1.	1.	1.
0.	0.	0.	0.	0.	0.
0.	0.	0.	0.	0.	0.
0.	0.	0.	0.	0.	0.
0.	0.	0.	0.	0.	0.
1.	1.	1.	1.	1.	1.
1.	1.	1.	1.	1.	1.
0.	0.	0.	0.	0.	0.
0.	0.	0.	0.	0.	0.
0.	0.	0.	0.	0.	0.
0.	0.	0.	0.	0.	0.
0.	0.	0.	0.	0.	0.
0.	0.	0.	0.	0.	0.
0.	0.	0.	0.	0.	0.
0.	0.	0.	0.	0.	0.
1.	1.	1.	1.	1.	1.
0.	0.	0.	0.	0.	0.
1.	1.	1.	1.	1.	1.
1.	1.	1.	1.	1.	1.
1.	1.	1.	1.	1.	1.
1.	1.	1.	1.	1.	1.
0.	0.	0.	0.	0.	0.
1.	1.	1.	1.	1.	1.
1.	1.	1.	1.	1.	1.
1.	1.	1.	1.	1.	1.
1.	1.	1.	1.	1.	1.
1.	1.	1.	1.	1.	1.
0.	0.	0.	0.	0.	0.
0.	0.	0.	0.	0.	0.
0.	0.	0.	0.	0.	0.
0.	0.	0.	0.	0.	0.
1.	1.	1.	1.	1.	1.
0.	0.	0.	0.	0.	0.
1.	1.	1.	1.	1.	1.
1.	1.	1.	1.	1.	1.
0.	0.	0.	0.	0.	0.
1.	1.	1.	1.	1.	1.
1.	1.	1.	1.	1.	1.
1.	1.	1.	1.	1.	1.
0.	0.	0.	0.	0.	0.
0.	0.	0.	0.	0.	0.
0.	0.	0.	0.	0.	0.
0.	0.	0.	0.	0.	0.
1.	1.	1.	1.	1.	1.
0.	0.	0.	0.	0.	0.
1.	1.	1.	1.	1.	1.
0.	0.	0.	0.	0.	0.
0.	0.	0.	0.	0.	0.
1.	1.	1.	1.	1.	1.
0.	0.	0.	0.	0.	0.
1.	1.	1.	1.	1.	1.
1.	1.	1.	1.	1.	1.
1.	1.	1.	1.	1.	1.
0.	0.	0.	0.	0.	0.
0.	0.	0.	0.	0.	0.
1.	1.	1.	1.	1.	1.
1.	1.	1.	1.	1.	1.
0.	0.	0.	0.	0.	0.
1.	1.	1.	1.	1.	1.
0.	0.	0.	0.	0.	0.
0.	0.	0.	0.	0.	0.
1.	1.	1.	1.	1.	1.
0.	0.	0.	0.	0.	0.
1.	1.	1.	1.	1.	1.
1.	1.	1.	1.	1.	1.
1.	1.	1.	1.	1.	1.
1.	1.	1.	1.	1.	1.
1.	1.	1.	1.	1.	1.
0.	0.	0.	0.	0.	0.
1.	1.	1.	1.	1.	1.
0.	0.	0.	0.	0.	0.
0.	0.	0.	0.	0.	0.
1.	1.	1.	1.	1.	1.
1.	1.	1.	1.	1.	1.
0.	0.	0.	0.	0.	0.
1.	1.	1.	1.	1.	1.
1.	1.	1.	1.	1.	1.
1.	1.	1.	1.	1.	1.
0.	0.	0.	0.	0.	0.
1.	1.	1.	1.	1.	1.
1.	1.	1.	1.	1.	1.
1.	1.	1.	1.	1.	1.
1.	1.	1.	1.	1.	1.
