# Supplementary material for: Stem cell topography splits growth and homeostatic functions in the fish gill
Source: eLife. 2019 May 16;8:e43747. doi: 10.7554/eLife.43747 (PMC6534379; doi:10.7554/eLife.43747)
Supplement: Supplementary file 3. — The table includes values for recombination (0 = unlabelled; 1 = labelled) in five gills enucleated from adult GaudíUbiq.iCre GaudíRSG fish that were induced for recombination at late embryonic stages. [file elife-43747-supp3.xlsx]

## Sheet: Sheet 1 - Experimental Data
Experimental Data
Gill 1
1.	1.	1.	1.	1.	1.
0.	0.	0.	0.	0.	0.
1.	1.	1.	1.	1.	1.
0.	0.	1.	1.	0.	0.
0.	0.	0.	0.	0.	0.
0.	0.	0.	0.	0.	0.
0.	0.	0.	0.	0.	0.
0.	0.	0.	0.	0.	0.
0.	0.	0.	0.	0.	0.
0.	0.	0.	0.	0.	0.
0.	0.	0.	0.	0.	0.
0.	0.	0.	0.	0.	0.
1.	1.	1.	1.	1.	1.
0.	0.	0.	0.	0.	0.
1.	1.	0.	0.	0.	0.
0.	0.	0.	0.	0.	0.
0.	0.	0.	0.	0.	0.
0.	0.	0.	0.	0.	0.
0.	0.	0.	0.	0.	0.
0.	1.	0.	0.	0.	0.
0.	0.	0.	0.	0.	0.
0.	0.	0.	0.	0.	0.
Gill 2
0.	0.	0.	0.	0.	0.
0.	0.	0.	0.	0.	0.
1.	1.	1.	1.	1.	1.
0.	0.	0.	0.	0.	0.
0.	0.	0.	0.	0.	0.
0.	0.	0.	0.	0.	0.
0.	0.	0.	0.	0.	0.
0.	0.	0.	0.	0.	0.
0.	0.	0.	0.	0.	0.
0.	0.	0.	0.	0.	0.
0.	0.	0.	0.	0.	0.
0.	0.	0.	0.	0.	0.
0.	0.	0.	0.	0.	0.
1.	1.	1.	1.	1.	1.
0.	0.	0.	0.	0.	0.
0.	0.	0.	0.	0.	0.
0.	0.	0.	0.	0.	0.
0.	0.	0.	0.	0.	0.
0.	0.	0.	0.	0.	0.
0.	0.	0.	0.	0.	0.
0.	0.	0.	0.	0.	0.
1.	1.	1.	1.	1.	1.
0.	0.	0.	0.	0.	0.
0.	0.	0.	0.	0.	0.
0.	0.	0.	0.	0.	0.
0.	0.	0.	0.	0.	0.
Gill 5
0.	0.	0.	0.	0.	0.
0.	0.	0.	0.	0.	0.
1.	1.	1.	0.	1.	1.
0.	0.	0.	0.	0.	0.
0.	0.	0.	0.	0.	0.
0.	0.	0.	0.	0.	0.
1.	1.	1.	0.	0.	0.
0.	0.	0.	0.	0.	0.
0.	0.	0.	0.	0.	0.
0.	0.	0.	0.	0.	0.
0.	0.	0.	0.	0.	0.
1.	1.	1.	1.	1.	1.
0.	0.	0.	0.	0.	0.
1.	1.	1.	1.	1.	1.
0.	0.	0.	0.	0.	0.
1.	1.	1.	1.	1.	1.
0.	0.	0.	0.	0.	0.
0.	0.	0.	0.	0.	0.
0.	0.	0.	0.	0.	0.
0.	0.	0.	0.	0.	0.
0.	0.	0.	0.	0.	0.
1.	1.	1.	1.	1.	1.
0.	0.	0.	0.	0.	0.
0.	0.	0.	0.	0.	0.
0.	0.	0.	0.	0.	0.
1.	1.	1.	1.	1.	1.
0.	0.	0.	0.	0.	0.
0.	0.	0.	0.	0.	0.
0.	0.	0.	0.	0.	0.
0.	0.	0.	0.	0.	0.
Gill 13
0.	0.	0.	0.	0.	0.
0.	0.	0.	0.	0.	0.
0.	0.	0.	0.	0.	0.
0.	0.	0.	0.	0.	0.
0.	0.	0.	0.	0.	0.
0.	0.	0.	0.	0.	0.
0.	0.	0.	0.	0.	0.
0.	0.	0.	0.	0.	1.
0.	0.	0.	0.	0.	0.
0.	0.	0.	0.	0.	0.
0.	0.	0.	0.	0.	0.
1.	1.	1.	1.	1.	1.
0.	0.	0.	0.	0.	0.
1.	1.	1.	1.	1.	1.
1.	0.	0.	1.	0.	1.
0.	0.	0.	0.	0.	0.
0.	0.	0.	0.	0.	0.
1.	0.	0.	0.	0.	0.
0.	0.	0.	0.	0.	0.
1.	1.	1.	1.	1.	1.
0.	0.	0.	0.	0.	0.
0.	0.	0.	0.	0.	0.
1.	0.	0.	0.	0.	0.
1.	1.	1.	1.	1.	1.
Gill 14
1.	1.	1.	1.	1.	1.
0.	0.	0.	0.	0.	1.
0.	0.	0.	0.	0.	0.
1.	1.	1.	1.	1.	1.
0.	0.	1.	0.	1.	1.
0.	0.	0.	0.	0.	0.
0.	0.	0.	0.	0.	0.
1.	1.	1.	1.	1.	1.
0.	0.	0.	1.	0.	0.
0.	0.	0.	0.	0.	1.
1.	1.	1.	1.	1.	1.
1.	1.	1.	1.	1.	1.
0.	0.	0.	0.	0.	1.
0.	0.	0.	0.	0.	0.
0.	0.	1.	1.	1.	1.
0.	0.	0.	0.	0.	0.
0.	0.	0.	0.	0.	0.
1.	1.	1.	1.	1.	1.
0.	0.	0.	0.	0.	0.
0.	0.	0.	0.	0.	0.
0.	1.	0.	0.	0.	0.
1.	1.	1.	1.	1.	1.
1.	1.	1.	1.	1.	1.
0.	0.	0.	0.	0.	0.
0.	0.	0.	0.	0.	0.
0.	1.	1.	1.	1.	1.
0.	0.	0.	0.	0.	0.
1.	1.	1.	1.	1.	1.
1.	1.	1.	1.	1.	1.
1.	1.	1.	1.	1.	1.
