# Supplementary material for: Stem cell topography splits growth and homeostatic functions in the fish gill
Source: eLife. 2019 May 16;8:e43747. doi: 10.7554/eLife.43747 (PMC6534379; doi:10.7554/eLife.43747)
Supplement: Supplementary file 5. — Representation of transcripts obtained from the apical and the medial domain of gill filaments, ordered according to their differential expression. [file elife-43747-supp5.xlsx]

## Sheet: DEGs (Gene Description +Zebrafi
Gene Zebrafish	ID Zebrafish	ID Medaka	Gene Medaka	Medial (v1)	Apical (v2)	v1+v2	log2(fold_change)	test_stat	p_value	q_value	significant
slain2	ENSDARG00000032114	ENSORLG00000004999	txnl4b	17.345	0	17.345	#NAME?	#NAME?	5e-05	0.00225489	yes
npy8ar	ENSDARG00000017234	ENSORLG00000013938	rab11bb (1 of many)	22.5172	0	22.5172	#NAME?	#NAME?	5e-05	0.00225489	yes
nitr22	ENSDARG00000075288	ENSORLG00000021219	ola-mir-17	1274.3	0	1274.3	#NAME?	#NAME?	0.00135	0.031507	yes
pkn1a	ENSDARG00000060184	ENSORLG00000027675	arfgap3	10.5761	0	10.5761	#NAME?	#NAME?	5e-05	0.00225489	yes
		ENSORLG00000025645		0	41.403	41.403	inf	#NAME?	5e-05	0.00225489	yes
		ENSORLG00000006134	clcn1a	0.41639	97.5859	98.0023	7.87259	11.4941	5e-05	0.00225489	yes
btaf1	ENSDARG00000060089	ENSORLG00000009408	gtpbp10	9.05578	70.6211	79.6769	2.96319	5.76848	5e-05	0.00225489	yes
tmem161a	ENSDARG00000012790	ENSORLG00000003608	si:busm1-52i16.2	1.82485	9.05826	10.8831	2.31146	3.28539	5e-05	0.00225489	yes
apip	ENSDARG00000003132	ENSORLG00000002842	prcp	1.89016	8.93388	10.824	2.24078	3.2825	0.0002	0.00685486	yes
rbm34	ENSDARG00000101877	ENSORLG00000022273		8.02207	33.5778	41.5999	2.06546	3.38254	0.00075	0.0198172	yes
		ENSORLG00000026723		5.21117	21.7119	26.9231	2.05881	3.40346	5e-05	0.00225489	yes
vps45	ENSDARG00000061180	ENSORLG00000024146	pdgfc	2.23187	8.52121	10.7531	1.93281	2.20373	0.00025	0.00823901	yes
tyw1	ENSDARG00000062987	ENSORLG00000016797		33.7042	128.339	162.043	1.92896	4.74579	5e-05	0.00225489	yes
hsd17b12a	ENSDARG00000015709	ENSORLG00000015819	scnm1	4.32638	16.4276	20.754	1.92489	3.11875	0.0002	0.00685486	yes
gss	ENSDARG00000037706	ENSORLG00000022295		3.25642	11.7034	14.9598	1.84557	2.48487	0.0003	0.00977935	yes
PITPNM2 (1 of many)	ENSDARG00000111528	ENSORLG00000010775	fzd4	5.01502	17.5894	22.6044	1.81038	4.09088	5e-05	0.00225489	yes
birc6	ENSDARG00000074166	ENSORLG00000027183		4.62673	14.892	19.5187	1.68647	2.88686	0.00015	0.0055882	yes
bmt2	ENSDARG00000062181	ENSORLG00000030372		17.3325	53.0345	70.367	1.61345	3.46745	5e-05	0.00225489	yes
tmem168b	ENSDARG00000062168	ENSORLG00000022880	glcci1a	13.4244	39.7279	53.1523	1.56529	2.74738	5e-05	0.00225489	yes
adrb2b	ENSDARG00000054510	ENSORLG00000014556	asna1	22.3915	66.0022	88.3937	1.55956	4.57309	5e-05	0.00225489	yes
hs2st1b	ENSDARG00000062008	ENSORLG00000015646		16.146	44.9066	61.0526	1.47575	2.79992	5e-05	0.00225489	yes
SECISBP2L	ENSDARG00000100084	ENSORLG00000005119	smfn	8.76144	24.1317	32.8931	1.46169	3.06804	5e-05	0.00225489	yes
slc30a4	ENSDARG00000007180	ENSORLG00000027068	si:ch1073-70f20.1	59.1842	161.627	220.811	1.44939	3.87583	5e-05	0.00225489	yes
aplnr2	ENSDARG00000004447	ENSORLG00000009915		3.16316	8.42208	11.5852	1.41281	2.94111	5e-05	0.00225489	yes
slc4a10a	ENSDARG00000063133	ENSORLG00000029427		5.01633	13.0796	18.0959	1.38261	2.15598	0.0009	0.0230692	yes
prcp	ENSDARG00000037883	ENSORLG00000007224	cyp7b1	51.5041	134.221	185.725	1.38185	3.13214	5e-05	0.00225489	yes
cldnh (1 of many)	ENSDARG00000069503	ENSORLG00000025659		11.7499	30.5491	42.299	1.37849	2.50971	5e-05	0.00225489	yes
pex19	ENSDARG00000004891	ENSORLG00000025885	tmem240a	2.88256	7.47428	10.3568	1.37458	1.97406	0.00145	0.0333222	yes
fndc3a	ENSDARG00000105503	ENSORLG00000026284		9.38399	24.295	33.679	1.37239	2.12638	0.0002	0.00685486	yes
nell2a	ENSDARG00000090690	ENSORLG00000001633	gss	4.32046	11.0495	15.37	1.35473	2.46952	5e-05	0.00225489	yes
stoml3a	ENSDARG00000079914	ENSORLG00000017337	cep350	3.23277	8.18029	11.4131	1.33938	2.27772	5e-05	0.00225489	yes
tnpo1	ENSDARG00000035390	ENSORLG00000027556		17.5992	44.1726	61.7718	1.32764	3.43776	5e-05	0.00225489	yes
ADAMTS20		ENSORLG00000015269		3.84304	9.5474	13.3904	1.31286	2.24927	5e-05	0.00225489	yes
spef2	ENSDARG00000098330	ENSORLG00000002324	SECISBP2L	4.12061	10.1266	14.2472	1.29721	3.26405	5e-05	0.00225489	yes
rprml	ENSDARG00000056768	ENSORLG00000006939	c4b	4.05132	9.79295	13.8443	1.27335	2.68978	0.00015	0.0055882	yes
		ENSORLG00000003479	DHRS9 (1 of many)	21.23	48.2201	69.4501	1.18353	2.54888	0.00045	0.013701	yes
DHRS9 (1 of many)		ENSORLG00000000665		4.05124	8.98475	13.036	1.14912	2.50398	5e-05	0.00225489	yes
si:busm1-52i16.2	ENSDARG00000058930	ENSORLG00000023257		77.8215	172.572	250.394	1.14896	4.03788	5e-05	0.00225489	yes
kif20ba	ENSDARG00000071009	ENSORLG00000005665	klhl38b	29.7552	64.5581	94.3133	1.11746	3.08788	5e-05	0.00225489	yes
epb41l3a	ENSDARG00000002255	ENSORLG00000021850	dachb	40.3659	86.007	126.373	1.09132	3.69659	5e-05	0.00225489	yes
		ENSORLG00000030037	yjefn3	4.41711	9.4029	13.82	1.09	2.4457	5e-05	0.00225489	yes
dlx5a	ENSDARG00000042296	ENSORLG00000000273	npy8ar	4.06314	8.64166	12.7048	1.08871	1.87938	0.00145	0.0333222	yes
		ENSORLG00000029773	si:ch211-81n22.1 (1 of many)	12.3528	26.2244	38.5772	1.08608	3.02519	5e-05	0.00225489	yes
znf362b	ENSDARG00000062231	ENSORLG00000022818	wrap53	7.46295	15.7056	23.1685	1.07346	2.06339	0.0006	0.0168958	yes
agfg1b	ENSDARG00000019526	ENSORLG00000010858	PPP2R3B	5.87344	12.1177	17.9911	1.04484	2.10835	0.00085	0.0220706	yes
kdm6al	ENSDARG00000059794	ENSORLG00000023904		3.99685	8.03712	12.034	1.00781	2.42681	0.0001	0.0040255	yes
txnl4b	ENSDARG00000058962	ENSORLG00000001638	PITPNM2 (1 of many)	3.3998	6.78435	10.1841	0.996759	2.12434	0.0004	0.012367	yes
smfn	ENSDARG00000009806	ENSORLG00000029996	gjd2b	9.37864	18.5287	27.9073	0.982315	2.68086	5e-05	0.00225489	yes
plce1	ENSDARG00000087921	ENSORLG00000000260	slain2	7.59044	14.9348	22.5252	0.976422	2.35878	5e-05	0.00225489	yes
ryr2b	ENSDARG00000003706	ENSORLG00000027297		45.4254	88.4141	133.84	0.960779	3.13996	5e-05	0.00225489	yes
klhl38b	ENSDARG00000040278	ENSORLG00000029822		27.1933	52.861	80.0543	0.958954	2.7882	5e-05	0.00225489	yes
LARP4B		ENSORLG00000000700	btaf1	5.72919	10.9732	16.7024	0.937589	2.45332	5e-05	0.00225489	yes
clcn1a	ENSDARG00000062084	ENSORLG00000002666	aplnr2	15.0977	28.895	43.9927	0.936496	2.1526	0.00035	0.0111665	yes
dagla	ENSDARG00000062956	ENSORLG00000028623	ensab	33.6704	63.7687	97.4391	0.92137	2.871	5e-05	0.00225489	yes
dsn1	ENSDARG00000089922	ENSORLG00000004190	epb41l3a	17.3624	32.7966	50.159	0.91758	1.81218	0.001	0.0252017	yes
cluap1	ENSDARG00000079110	ENSORLG00000009938	cdca8	20.1454	37.7507	57.8961	0.90605	2.13377	0.00015	0.0055882	yes
cdc23	ENSDARG00000044484	ENSORLG00000027590		5.11953	9.56524	14.6848	0.901791	2.10676	0.0004	0.012367	yes
acadvl	ENSDARG00000016687	ENSORLG00000001360		31.5478	58.8675	90.4153	0.899934	2.59605	5e-05	0.00225489	yes
	ENSDARG00000113064	ENSORLG00000001771	birc6	16.0462	29.8163	45.8625	0.893872	2.96337	5e-05	0.00225489	yes
c4b	ENSDARG00000038424	ENSORLG00000025312		303.14	562.319	865.459	0.891405	3.11486	5e-05	0.00225489	yes
si:dkey-202l22.6	ENSDARG00000102364	ENSORLG00000027563		1051.49	1949.96	3001.45	0.891013	3.03431	5e-05	0.00225489	yes
cyp7b1	ENSDARG00000008858	ENSORLG00000002976	fndc3a	140.143	254.431	394.574	0.860368	2.76357	5e-05	0.00225489	yes
ppp1r16a	ENSDARG00000076980	ENSORLG00000024921		6.16445	11.1608	17.3253	0.856398	1.99979	0.0006	0.0168958	yes
zgc:154058	ENSDARG00000069795	ENSORLG00000024967		10.7536	19.3572	30.1108	0.848046	2.45797	0.00015	0.0055882	yes
UHRF2		ENSORLG00000015683	smad2	4.34655	7.81928	12.1658	0.847165	1.88645	0.00155	0.0350826	yes
dlg1l	ENSDARG00000102216	ENSORLG00000007546	UHRF2	11.9748	21.4308	33.4056	0.839685	2.02227	0.0006	0.0168958	yes
erbb3b	ENSDARG00000036993	ENSORLG00000027039	cart4	10.4063	18.6222	29.0285	0.839561	1.84105	0.0022	0.0441324	yes
pa2g4b	ENSDARG00000070657	ENSORLG00000019402	TSPAN5	5.13227	9.15354	14.2858	0.834734	2.00799	0.0002	0.00685486	yes
si:dkey-192j17.1	ENSDARG00000088842	ENSORLG00000024484		8.92274	15.8842	24.8069	0.832037	2.30964	0.0001	0.0040255	yes
	ENSDARG00000013153	ENSORLG00000002214	adrb2b	10.2064	18.1623	28.3687	0.831482	1.85408	0.0016	0.035809	yes
	ENSDARG00000036462	ENSORLG00000026573	ssh2b	3.99499	7.10049	11.0955	0.829726	2.09354	0.00015	0.0055882	yes
brf2	ENSDARG00000104644	ENSORLG00000029405	pcdh2ab9	3.86917	6.83331	10.7025	0.820563	1.92352	0.00245	0.0478668	yes
srsf5a	ENSDARG00000029818	ENSORLG00000007325	ppp1r16a	4.74031	8.34093	13.0812	0.815225	1.81593	0.002	0.0422394	yes
pin1	ENSDARG00000101915	ENSORLG00000026629		56.99	97.4455	154.435	0.773887	2.35061	5e-05	0.00225489	yes
gtpbp10	ENSDARG00000040300	ENSORLG00000024675		112.868	192.466	305.334	0.769964	2.34407	5e-05	0.00225489	yes
	ENSDARG00000052497	ENSORLG00000024742	si:dkey-4e7.3 (1 of many)	37.442	63.7067	101.149	0.766785	2.15983	0.0002	0.00685486	yes
cdca8	ENSDARG00000043137	ENSORLG00000024123		11.7599	19.9247	31.6846	0.76068	2.00858	0.0007	0.0187437	yes
gyg1b	ENSDARG00000059391	ENSORLG00000024832		11.8403	19.7181	31.5584	0.735815	1.7744	0.00235	0.0463661	yes
entpd1	ENSDARG00000045066	ENSORLG00000015264	dnajc25	31.6073	52.1815	83.7888	0.723282	1.84123	0.00105	0.0260244	yes
atad5a	ENSDARG00000070568	ENSORLG00000001390	vps45	2257.14	3677.72	5934.86	0.704317	2.18607	0.00015	0.0055882	yes
itga10	ENSDARG00000002507	ENSORLG00000011381	josd2	22.1558	36.0978	58.2536	0.704227	2.06629	0.00025	0.00823901	yes
fzd4	ENSDARG00000104117	ENSORLG00000003677	kif20ba	9.9123	15.8425	25.7548	0.676505	2.02102	0.00065	0.0176412	yes
PPP2R3B		ENSORLG00000006915		17.942	28.0348	45.9768	0.643872	1.82764	0.00165	0.0365192	yes
cacna1aa	ENSDARG00000037905	ENSORLG00000011019	cacna1aa	12.51	19.5283	32.0383	0.64248	1.8321	0.0018	0.0392596	yes
bmp1a	ENSDARG00000028071	ENSORLG00000005221	ryr2b	11.6315	18.142	29.7735	0.641301	2.06255	0.0003	0.00977935	yes
tmem62	ENSDARG00000053890	ENSORLG00000006654	cluap1	15.9618	24.886	40.8478	0.640717	1.7913	0.00175	0.0383084	yes
josd2	ENSDARG00000057626	ENSORLG00000012440	auts2a	35.8599	55.9078	91.7677	0.640679	2.08804	5e-05	0.00225489	yes
oxsr1a	ENSDARG00000034189	ENSORLG00000019163	or112-1	101.261	157.339	258.6	0.63579	1.94336	0.0005	0.0147734	yes
tmem151ba	ENSDARG00000060034	ENSORLG00000024083		24.002	37.1894	61.1914	0.631734	1.93769	0.00065	0.0176412	yes
trim110	ENSDARG00000068240	ENSORLG00000002946	pex19	111.652	172.306	283.958	0.625968	1.95421	0.00085	0.0220706	yes
si:ch211-120g10.1	ENSDARG00000090930	ENSORLG00000026595		16.6676	25.5703	42.2379	0.617423	1.81087	0.0013	0.0306984	yes
auts2a	ENSDARG00000056427	ENSORLG00000003194	ADAMTS20	40.0066	60.387	100.394	0.594001	1.97026	0.00105	0.0260244	yes
	ENSDARG00000115505	ENSORLG00000010249	itga10	35.8668	54.1153	89.9821	0.593389	1.97529	0.0006	0.0168958	yes
vgll2b	ENSDARG00000053773	ENSORLG00000025275		20.7623	31.0831	51.8454	0.582164	1.69154	0.0026	0.0499833	yes
MEIS2		ENSORLG00000002912	cldnh (1 of many)	209.484	313.384	522.868	0.581094	1.77705	0.00215	0.0434199	yes
ATE1	ENSDARG00000103813	ENSORLG00000025141	plp2	51.4338	76.8743	128.308	0.579785	1.7522	0.0024	0.0471974	yes
gramd1bb	ENSDARG00000074258	ENSORLG00000027079	mtus2a	21.2426	31.7371	52.9797	0.579209	1.78565	0.0019	0.0405559	yes
rab11bb (1 of many)	ENSDARG00000090086	ENSORLG00000000385	pkn1a	20.4374	30.0594	50.4968	0.556604	1.7608	0.0015	0.0342091	yes
		ENSORLG00000025924	si:ch211-229i14.2	49.7907	72.3221	122.113	0.538562	1.86097	0.001	0.0252017	yes
slc25a36a	ENSDARG00000038731	ENSORLG00000024729		28.3573	40.6748	69.0321	0.520414	1.77808	0.00195	0.041329	yes
itga6b	ENSDARG00000069946	ENSORLG00000006819	acadvl	332.304	474.502	806.806	0.51391	1.7557	0.00205	0.0425464	yes
zc3h12a	ENSDARG00000005271	ENSORLG00000024996		1536.98	2169.96	3706.94	0.497566	1.76594	0.0021	0.0429891	yes
	ENSDARG00000029822	ENSORLG00000018113		55.7696	39.2269	94.9965	-0.507636	-1.75875	0.0021	0.0429891	yes
	ENSDARG00000062630	ENSORLG00000018128	acmsd	148.217	103.51	251.727	-0.51794	-1.72879	0.00205	0.0425464	yes
asna1	ENSDARG00000018190	ENSORLG00000013127	MEIS2	57.9987	40.182	98.1807	-0.529471	-1.74299	0.00215	0.0434199	yes
		ENSORLG00000007626	dlg1l	319.767	221.208	540.975	-0.531623	-1.85848	0.00155	0.0350826	yes
snx19b	ENSDARG00000079931	ENSORLG00000019437	acta2	185.306	127.693	312.999	-0.53723	-1.86067	0.0013	0.0306984	yes
dnajc25	ENSDARG00000067613	ENSORLG00000016627	usp44	69.99	47.296	117.286	-0.56543	-1.75446	0.00185	0.0397717	yes
		ENSORLG00000026067		26.5652	17.9386	44.5038	-0.566471	-1.78002	0.00145	0.0333222	yes
	ENSDARG00000102336	ENSORLG00000015913	herc2	33.2986	22.3756	55.6742	-0.573537	-1.98873	0.00055	0.0157842	yes
EPHA6		ENSORLG00000022704		167.164	111.127	278.291	-0.589048	-2.02774	0.0004	0.012367	yes
		ENSORLG00000029564		91.6495	60.7481	152.398	-0.593287	-2.04354	0.0005	0.0147734	yes
smad2	ENSDARG00000006389	ENSORLG00000013377	gramd1bb	86.7009	57.1081	143.809	-0.602352	-1.90565	0.00085	0.0220706	yes
	ENSDARG00000102981	ENSORLG00000012511	vgll2b	35.4233	23.2883	58.7116	-0.605093	-1.82706	0.0013	0.0306984	yes
camsap2b	ENSDARG00000059965	ENSORLG00000028121		95.925	63.014	158.939	-0.606234	-1.98088	0.00055	0.0157842	yes
tmem131	ENSDARG00000056259	ENSORLG00000015611	EPHA6	22.3982	14.7107	37.1089	-0.606516	-1.81077	0.0016	0.035809	yes
scnm1	ENSDARG00000003027	ENSORLG00000016681	galnt13	46.899	30.7723	77.6713	-0.607924	-2.04813	0.0004	0.012367	yes
herc2	ENSDARG00000073841	ENSORLG00000015563		22.9583	14.9861	37.9444	-0.615392	-1.90604	0.0007	0.0187437	yes
mrpl35	ENSDARG00000070589	ENSORLG00000016195	znf395b	67.4036	43.8218	111.225	-0.621179	-1.93995	0.00075	0.0198172	yes
VWA5B1	ENSDARG00000059705	ENSORLG00000023865	cd276	20.19	12.8349	33.0249	-0.653572	-1.86831	0.00175	0.0383084	yes
znf395b	ENSDARG00000024195	ENSORLG00000028289		200.284	127.294	327.578	-0.653885	-2.26799	5e-05	0.00225489	yes
sept7b	ENSDARG00000052673	ENSORLG00000007393	zgc:154058	25.2982	16.0624	41.3606	-0.655343	-1.83094	0.001	0.0252017	yes
usp44	ENSDARG00000089861	ENSORLG00000005200	plce1	14.1727	8.93996	23.1127	-0.664771	-1.8687	0.00135	0.031507	yes
galnt13	ENSDARG00000099227	ENSORLG00000006508	dagla	14.8113	9.29962	24.1109	-0.671457	-2.01382	0.00045	0.013701	yes
		ENSORLG00000027307		11.9019	7.44123	19.3431	-0.677576	-2.00788	0.00055	0.0157842	yes
wdfy3	ENSDARG00000078890	ENSORLG00000024195		19.7281	12.3132	32.0413	-0.680045	-1.78185	0.0023	0.0455294	yes
lpl	ENSDARG00000087697	ENSORLG00000007685	erbb3b	31.4479	19.5712	51.0191	-0.684234	-2.23045	0.0001	0.0040255	yes
stk39	ENSDARG00000087203	ENSORLG00000027029		7.15892	4.42236	11.5813	-0.694926	-1.73367	0.00245	0.0478668	yes
klhdc7a	ENSDARG00000105322	ENSORLG00000003018	nell2a	25.4182	15.6855	41.1037	-0.69643	-2.00791	0.00035	0.0111665	yes
phlpp1	ENSDARG00000078694	ENSORLG00000003151	stoml3a	34.6509	21.3181	55.969	-0.700814	-1.74847	0.00215	0.0434199	yes
cep350	ENSDARG00000058000	ENSORLG00000029910	tomm20b	30.9607	18.9911	49.9518	-0.705118	-1.96832	0.00075	0.0198172	yes
tmem214	ENSDARG00000016968	ENSORLG00000001221	rbm34	47.2794	28.9542	76.2336	-0.707441	-1.84261	0.0022	0.0441324	yes
cacnb2b	ENSDARG00000055565	ENSORLG00000023381	irs4a	28.936	17.6695	46.6055	-0.711607	-2.14365	0.0002	0.00685486	yes
ndufaf7	ENSDARG00000033134	ENSORLG00000006778	cdc23	61.5052	37.5103	99.0155	-0.713423	-2.18145	0.0001	0.0040255	yes
	ENSDARG00000020834	ENSORLG00000027928	pomt2	57.7339	35.1833	92.9172	-0.714528	-2.1248	0.0001	0.0040255	yes
acmsd	ENSDARG00000062549	ENSORLG00000028423		38.5265	23.4708	61.9973	-0.714983	-1.71955	0.0026	0.0499833	yes
		ENSORLG00000015740	tmem131	13.7209	8.34375	22.0647	-0.717605	-1.92599	0.0008	0.0210456	yes
or112-1	ENSDARG00000077211	ENSORLG00000007696	pa2g4b	133.087	80.5547	213.642	-0.724333	-2.43809	5e-05	0.00225489	yes
TSPAN5		ENSORLG00000023981	CDH3 (1 of many)	24.4387	14.758	39.1967	-0.72767	-1.92946	0.0013	0.0306984	yes
acta2	ENSDARG00000045180	ENSORLG00000028740		14.8053	8.91612	23.7214	-0.731629	-1.92924	0.00105	0.0260244	yes
slc31a1	ENSDARG00000013961	ENSORLG00000028951	cfap99	49.4836	29.3851	78.8687	-0.751867	-2.14336	5e-05	0.00225489	yes
zgc:92137	ENSDARG00000030357	ENSORLG00000004719	agfg1b	63.2187	37.3054	100.524	-0.760969	-2.44969	0.0001	0.0040255	yes
ola-mir-17	ENSDARG00000080742	ENSORLG00000011156	bmp1a	9.54102	5.62179	15.1628	-0.763112	-1.77375	0.00225	0.044985	yes
		ENSORLG00000024778	cahz	7.53801	4.43004	11.968	-0.766865	-1.80645	0.00185	0.0397717	yes
dachb	ENSDARG00000034785	ENSORLG00000017033	stk39	10.1966	5.96132	16.1579	-0.774385	-1.757	0.00205	0.0425464	yes
	ENSDARG00000074168	ENSORLG00000009989	entpd1	99.9554	57.9773	157.933	-0.785796	-2.16664	0.0002	0.00685486	yes
si:ch211-256m1.8	ENSDARG00000055172	ENSORLG00000004661		24.4201	14.1079	38.528	-0.791567	-2.30385	0.0002	0.00685486	yes
		ENSORLG00000030549		15.1717	8.60359	23.7753	-0.818371	-1.83043	0.00165	0.0365192	yes
		ENSORLG00000017203	phlpp1	6.39675	3.62198	10.0187	-0.820561	-2.18973	0.0001	0.0040255	yes
		ENSORLG00000029709		27.0924	15.3368	42.4292	-0.820888	-1.92346	0.0015	0.0342091	yes
tcf20	ENSDARG00000078348	ENSORLG00000004688	znf362b	9.10014	5.12555	14.2257	-0.828181	-1.83173	0.00115	0.0282693	yes
	ENSDARG00000075834	ENSORLG00000002464	slc30a4	42.6473	23.9462	66.5935	-0.832656	-2.68762	5e-05	0.00225489	yes
wrap53	ENSDARG00000086150	ENSORLG00000028910	lin52	95.6651	53.4559	149.121	-0.839644	-2.23317	0.0001	0.0040255	yes
	ENSDARG00000108530	ENSORLG00000026713	SHISA6	20.8569	11.5492	32.4061	-0.85273	-2.38916	0.0001	0.0040255	yes
glcci1a	ENSDARG00000008503	ENSORLG00000002809	slc4a10a	28.8603	15.9643	44.8246	-0.854233	-2.37943	5e-05	0.00225489	yes
eif4h	ENSDARG00000042252	ENSORLG00000002055	bmt2	181.031	100.052	281.083	-0.855487	-2.85423	5e-05	0.00225489	yes
	ENSDARG00000053380	ENSORLG00000001393	tyw1	22.0311	12.102	34.1331	-0.864302	-2.13106	0.0005	0.0147734	yes
	ENSDARG00000088813	ENSORLG00000000381	nitr22	42.5104	23.2417	65.7521	-0.871101	-2.1549	0.0002	0.00685486	yes
pthlha	ENSDARG00000031737	ENSORLG00000024103	setd2	59.2598	31.8944	91.1542	-0.893751	-3.13918	5e-05	0.00225489	yes
irs4a	ENSDARG00000086551	ENSORLG00000011208	tmem62	23.2712	12.4734	35.7446	-0.899691	-2.70018	5e-05	0.00225489	yes
		ENSORLG00000006080	LARP4B	14.2154	7.61213	21.8275	-0.901085	-2.15489	0.0004	0.012367	yes
cd276	ENSDARG00000003061	ENSORLG00000028216		21.6683	11.5501	33.2184	-0.907679	-2.6606	5e-05	0.00225489	yes
		ENSORLG00000027933		16.9064	9.00109	25.9075	-0.9094	-2.03518	0.00065	0.0176412	yes
CDH3 (1 of many)	ENSDARG00000104332	ENSORLG00000030590	mcts1	28.5276	14.7573	43.2849	-0.950934	-2.46313	5e-05	0.00225489	yes
hspb6	ENSDARG00000077236	ENSORLG00000004864	kdm6al	66.2421	34.2267	100.469	-0.952624	-2.91776	5e-05	0.00225489	yes
		ENSORLG00000023505		31.3222	16.1815	47.5037	-0.952838	-2.59	5e-05	0.00225489	yes
setd2	ENSDARG00000062244	ENSORLG00000017680	tmem214	8.92636	4.61144	13.5378	-0.952854	-2.13479	0.0001	0.0040255	yes
		ENSORLG00000017128	klhdc7a	24.7022	12.5951	37.2973	-0.971779	-2.32859	5e-05	0.00225489	yes
pdgfc	ENSDARG00000077588	ENSORLG00000008840		61.6045	31.3483	92.9528	-0.974648	-2.60867	5e-05	0.00225489	yes
	ENSDARG00000100486	ENSORLG00000023991	hspb6	26.6438	13.4421	40.0859	-0.987039	-3.03527	5e-05	0.00225489	yes
zgc:92162	ENSDARG00000099344	ENSORLG00000030068		107.953	54.3326	162.286	-0.990515	-2.42537	5e-05	0.00225489	yes
		ENSORLG00000011928	tmem151ba	110.366	55.2696	165.636	-0.997733	-3.21581	5e-05	0.00225489	yes
		ENSORLG00000014964		38.9795	19.3972	58.3767	-1.00687	-2.3728	5e-05	0.00225489	yes
		ENSORLG00000027179	PLXDC1 (1 of many)	8.09286	4.01074	12.1036	-1.01278	-2.38377	0.0001	0.0040255	yes
si:dkey-4e7.3 (1 of many)	ENSDARG00000042124	ENSORLG00000000433		6.76174	3.31277	10.0745	-1.02936	-1.89041	0.00135	0.031507	yes
cahz	ENSDARG00000011166	ENSORLG00000009268	srsf5a	35.5006	17.2901	52.7907	-1.03789	-2.91452	5e-05	0.00225489	yes
	ENSDARG00000116065	ENSORLG00000029880	pagr1	9.42129	4.58842	14.0097	-1.03793	-2.53441	5e-05	0.00225489	yes
		ENSORLG00000023340	pthlha	57.7636	27.7909	85.5545	-1.05555	-3.39729	5e-05	0.00225489	yes
		ENSORLG00000030288	lsm1	34.773	16.6636	51.4366	-1.06126	-3.04069	5e-05	0.00225489	yes
		ENSORLG00000016997	lpl	18.419	8.76532	27.1843	-1.07132	-2.84654	5e-05	0.00225489	yes
ndufa4	ENSDARG00000056108	ENSORLG00000015700	camsap2b	7.14953	3.39368	10.5432	-1.075	-2.6377	5e-05	0.00225489	yes
		ENSORLG00000014364	itga6b	30.6234	14.5335	45.1569	-1.07526	-2.95058	5e-05	0.00225489	yes
plp2	ENSDARG00000036630	ENSORLG00000014448	zc3h12a	19.6001	9.18816	28.7883	-1.09302	-2.83358	5e-05	0.00225489	yes
	ENSDARG00000058869	ENSORLG00000023059	eif4h	13.9033	6.24426	20.1476	-1.15482	-2.54435	5e-05	0.00225489	yes
		ENSORLG00000017898	cacnb2b	12.0289	5.34805	17.377	-1.16943	-2.08972	0.0007	0.0187437	yes
		ENSORLG00000015918	mrpl35	40.8008	18.1357	58.9365	-1.16976	-2.85684	5e-05	0.00225489	yes
		ENSORLG00000027637		365.213	159.408	524.621	-1.19602	-4.12189	5e-05	0.00225489	yes
tmem240a	ENSDARG00000087916	ENSORLG00000022313		27.7623	12.0341	39.7964	-1.206	-1.95046	0.0021	0.0429891	yes
si:ch211-229i14.2	ENSDARG00000086048	ENSORLG00000000790	tmem161a	21.242	9.19437	30.4364	-1.20809	-1.88172	0.0017	0.0374875	yes
		ENSORLG00000025112		13.802	5.94821	19.7502	-1.21435	-2.51624	0.00015	0.0055882	yes
		ENSORLG00000016882	wdfy3	13.3506	5.6955	19.0461	-1.22901	-3.55606	5e-05	0.00225489	yes
		ENSORLG00000000982	apip	21.5783	9.15601	30.7343	-1.23679	-2.97832	5e-05	0.00225489	yes
ssh2b	ENSDARG00000098955	ENSORLG00000029199		22.2734	9.39791	31.6713	-1.24491	-2.74782	5e-05	0.00225489	yes
		ENSORLG00000027760		13.3951	5.59926	18.9944	-1.2584	-3.18165	5e-05	0.00225489	yes
		ENSORLG00000004270		22.8344	9.38453	32.2189	-1.28285	-3.30169	5e-05	0.00225489	yes
SHISA6		ENSORLG00000003182	tnpo1	8.18798	3.35457	11.5425	-1.28738	-2.37158	0.00015	0.0055882	yes
	ENSDARG00000116955	ENSORLG00000018112	ndufaf7	27.4819	11.2474	38.7293	-1.28889	-2.53731	5e-05	0.00225489	yes
		ENSORLG00000019615	slc31a1	49.3689	20.111	69.4799	-1.29562	-3.10395	5e-05	0.00225489	yes
cart4	ENSDARG00000070142	ENSORLG00000023236		58.1578	23.1422	81.3	-1.32945	-3.87491	5e-05	0.00225489	yes
si:ch1073-70f20.1	ENSDARG00000074930	ENSORLG00000007148	si:dkey-202l22.6	11.5202	4.57541	16.0956	-1.33219	-3.27205	5e-05	0.00225489	yes
mtus2a	ENSDARG00000062347	ENSORLG00000008012	si:dkey-192j17.1	10.7035	4.19428	14.8978	-1.35159	-3.45595	5e-05	0.00225489	yes
PLXDC1 (1 of many)		ENSORLG00000003439		10.5476	4.05186	14.5995	-1.38026	-2.19057	0.00055	0.0157842	yes
		ENSORLG00000015968	VWA5B1	14.1656	5.32938	19.495	-1.41035	-4.03841	5e-05	0.00225489	yes
		ENSORLG00000010214	atad5a	10.6435	3.94981	14.5933	-1.43012	-3.53867	5e-05	0.00225489	yes
		ENSORLG00000012449		65.0205	24.0553	89.0758	-1.43454	-4.25802	5e-05	0.00225489	yes
		ENSORLG00000004561	dlx5a	10.9648	4.04246	15.0073	-1.43958	-2.53359	0.00015	0.0055882	yes
		ENSORLG00000011811	oxsr1a	26.9947	9.59519	36.5899	-1.49229	-4.15173	5e-05	0.00225489	yes
		ENSORLG00000009334	pin1	15.0647	5.30799	20.3727	-1.50494	-2.59696	0.00015	0.0055882	yes
		ENSORLG00000024365	zgc:92162	105.913	37.115	143.028	-1.5128	-4.64278	5e-05	0.00225489	yes
	ENSDARG00000039299	ENSORLG00000013220	ATE1	27.9665	9.76755	37.734	-1.51763	-3.84026	5e-05	0.00225489	yes
arfgap3	ENSDARG00000097583	ENSORLG00000013943		24.8898	8.63798	33.5278	-1.52679	-3.17274	5e-05	0.00225489	yes
	ENSDARG00000039096	ENSORLG00000008859	brf2	40.8904	14.01	54.9004	-1.5453	-1.96854	0.00065	0.0176412	yes
	ENSDARG00000105228	ENSORLG00000009975	gyg1b	16.3154	5.29184	21.6072	-1.62439	-3.59728	5e-05	0.00225489	yes
pomt2	ENSDARG00000055027	ENSORLG00000020006	zgc:92137	213.211	64.5089	277.72	-1.72471	-5.61884	5e-05	0.00225489	yes
		ENSORLG00000027646		41.4329	12.4343	53.8672	-1.73645	-5.20243	5e-05	0.00225489	yes
		ENSORLG00000015690		79.5371	23.0602	102.597	-1.78622	-4.86738	5e-05	0.00225489	yes
	ENSDARG00000102503	ENSORLG00000022566	tcf20	154.673	40.4486	195.122	-1.93506	-6.52218	5e-05	0.00225489	yes
		ENSORLG00000003349	spef2	10.5621	2.74648	13.3086	-1.94324	-3.82858	5e-05	0.00225489	yes
	ENSDARG00000116955	ENSORLG00000014526		11.5256	2.96988	14.4955	-1.95636	-3.41047	5e-05	0.00225489	yes
ensab	ENSDARG00000036944	ENSORLG00000014464		10.0939	2.54919	12.6431	-1.98538	-3.6269	5e-05	0.00225489	yes
	ENSDARG00000077009	ENSORLG00000022248	si:ch211-256m1.8	27.1775	6.25072	33.4282	-2.12032	-5.70953	5e-05	0.00225489	yes
lin52	ENSDARG00000070833	ENSORLG00000027807		47.3578	10.6854	58.0432	-2.14796	-2.8845	0.0002	0.00685486	yes
cfap99	ENSDARG00000097485	ENSORLG00000001421	hsd17b12a	16.3951	3.17796	19.5731	-2.36709	-4.86998	5e-05	0.00225489	yes
		ENSORLG00000022050		15.66	3.02704	18.687	-2.3711	-6.60239	5e-05	0.00225489	yes
pcdh2ab9	ENSDARG00000101318	ENSORLG00000021749		12.6532	2.16989	14.8231	-2.54381	-2.80451	0.0005	0.0147734	yes
		ENSORLG00000008599		80.3023	12.7575	93.0598	-2.65409	-8.22355	5e-05	0.00225489	yes
		ENSORLG00000012133	trim110	15.0977	2.37642	17.4741	-2.66746	-2.92602	0.00055	0.0157842	yes
	ENSDARG00000101338	ENSORLG00000002066	tmem168b	55.1517	8.61604	63.7677	-2.67831	-6.5493	5e-05	0.00225489	yes
si:ch211-81n22.1 (1 of many)	ENSDARG00000077028	ENSORLG00000015174	snx19b	10.0815	1.3624	11.4439	-2.88748	-6.29193	5e-05	0.00225489	yes
	ENSDARG00000095515	ENSORLG00000016371	sept7b	23.7911	2.45843	26.2495	-3.27462	-5.12494	5e-05	0.00225489	yes
pagr1	ENSDARG00000076966	ENSORLG00000018640		37.6597	2.98935	40.6491	-3.65512	-2.89568	0.00205	0.0425464	yes
tomm20b	ENSDARG00000103566	ENSORLG00000026504		16.5151	1.26881	17.7839	-3.70224	-7.13526	5e-05	0.00225489	yes
gjd2b	ENSDARG00000070781	ENSORLG00000012256	si:ch211-120g10.1	15.8733	0.968423	16.8417	-4.03482	-5.67494	5e-05	0.00225489	yes
yjefn3	ENSDARG00000061692	ENSORLG00000013978	slc25a36a	9.63458	0.547158	10.1817	-4.13819	-2.07515	0.00095	0.0242472	yes
	ENSDARG00000113458	ENSORLG00000002250	hs2st1b	13.1137	0.631531	13.7452	-4.37608	-4.85344	5e-05	0.00225489	yes
lsm1	ENSDARG00000043177	ENSORLG00000022851		10.0592	0.350177	10.4094	-4.84429	-0.897262	0.00125	0.0302319	yes
		ENSORLG00000006532	dsn1	48.2014	1.57026	49.7717	-4.94	-7.51869	5e-05	0.00225489	yes
	ENSDARG00000101702	ENSORLG00000025082	ndufa4	44.5013	1.08526	45.5866	-5.35774	-7.76015	5e-05	0.00225489	yes
mcts1	ENSDARG00000025972	ENSORLG00000003396	rprml	709.055	6.51009	715.565	-6.76708	-9.10742	0.00205	0.0425464	yes
