# Supplementary material for: Stem cell topography splits growth and homeostatic functions in the fish gill
Source: eLife. 2019 May 16;8:e43747. doi: 10.7554/eLife.43747 (PMC6534379; doi:10.7554/eLife.43747)
Supplement: Supplementary file 6. — The table displays values of recombination (0 = unlabelled; 1 = Pattern 1; 2 = Pattern 2; 3 = Pattern 3; 4 = Pattern 4) in gills enucleated from adult GaudíUbiq.iCre GaudíRSG fish that were induced for recombination at late embryonic stages. [file elife-43747-supp6.xlsx]

## Sheet: ExpData-Patterns
peripheral					centre
1	1	1	1	1	1
1	1	1	1	1	1
1	1	1	1	1	1
1	1	1	0	0	0
1	1	1	0	1	1
1	1	1	1	1	1
1	1	1	1	1	1
1	1	1	2	2	2
1	1	1	0	1	1
1	1	1	1	1	1
1	1	1	1	1	1
1	1	1	1	1	1
1	1	1	1	1	1
1	1	1	1	1	1
1	1	1	1	1	1
1	1	1	1	1	1
1	1	1	1	1	1
1	1	1	1	1	1
1	1	1	1	1	1
1	1	1	1	1	1
1	1	1	1	1	1
1	1	1	1	1	1
1	1	1	1	1	1
1	1	1	1	1	1
1	1	1	1	1	1
1	1	1	1	1	1
1	1	1	1	1	1
1	1	1	1	1	1
1	1	1	1	1	1
1	1	1	1	1	1
1	1	1	1	1	1
1	1	1	1	1	3
1	1	1	1	1	1
1	1	1	1	1	1
1	1	1	1	1	1
1	1	1	1	1	1
1	1	1	1	1	1
1	1	1	1	1	1
1	1	1	1	1	1
1	1	1	1	1	1
1	1	1	1	1	1
1	1	1	1	1	1
1	1	1	1	1	1
1	1	1	1	1	1
1	1	1	1	1	1
1	1	1	1	1	1
1	1	1	1	1	1
1	1	1	1	1	1
1	1	1	1	1	1
1	1	1	1	1	1
1	1	1	1	1	1
1	1	1	1	1	1
1	1	1	1	1	1
1	1	1	1	1	1
1	1	1	1	1	1
1	1	1	1	1	1
1	1	1	1	1	1
1	1	1	1	1	1
1	1	1	1	1	1
1	1	1	1	1	1
1	1	1	1	1	1
1	1	1	1	1	1
1	1	1	1	1	0
1	1	1	1	1	1
1	1	1	1	1	1
1	1	1	1	1	1
1	1	1	1	1	1
1	1	1	1	1	1
1	1	1	1	1	1
1	1	1	1	1	1
1	1	1	1	1	1
1	1	1	1	1	1
1	1	1	1	1	1
1	1	1	1	1	1
1	1	1	1	1	1
1	1	1	1	1	1
1	1	1	1	1	1
1	1	1	1	1	1
1	1	1	1	1	1
1	1	1	1	1	1
1	1	1	1	1	1
1	1	1	1	1	1
1	1	1	1	1	1
2	2	2	2	0	0
2	2	2	2	2	2
2	2	2	2	2	2
2	2	2	2	2	2
2	2	2	2	0	0
2	2	2	2	0	0
2	2	2	2	0	1
2	0	2	0	0	0
2	2	2	0	0	0
2	2	2	0	0	2
2	2	0	0	0	0
2	2	2	2	2	2.1
2	2	2	2	2	2
2	2	2	2	2	0
2	2	2	2	2	0
2	2	2	2	2	0
2	2	2	2.1	0	0
2	2	2	2	0	0
2	2.2	2.2	0	0	0
2	2	2	2	2	2
2	2	2	2	2	2
2	2	2	2	2	1
2	2	2	2	0	0
2	2	2	3	3	3
2	2	2	2	2	2
2	2	2	2	2	2
2	2	2	2	2	2
2	2	2	2	2	2
2	2	2	2	2	0
2	2	2	2	2	2
2	2	2	2	2	2
2	2	2	2	2	2
2	2	2	2	2	2
2	2	2	1.2	0	0
2	2	2	2	2	2
2	2	2	2	0	2
2	2	2	2	0	0
2	2	2	2	2	2
2	2	2	0	0	0
2	2	2	2	2	2
2	2	2	2	2	2
2	0	2	0	0	0
2	2	2	2	2	2
2	2	2	2	2	0
3	3	3	3	3	3
3	3	3	3	3	3
3	0	3	0	3	3
3	3	3	3	3	3
3	3	3	3	3	3
3	3	3	3	3	3
3	3	3	3	3	3
3	3	3	3	3	3
3	3	3	3	3	3
3	3	3	3	3	3
3	3	3	3	3	3
3	3	3	3	3	3
3	3	3	3	3	3
3	3	3	3	3	3
3	3	3	3	3	3
3	3	3	3	3	3
3	3	3	3	3	3
3	3	3	3	3	3
3	3	3	3	3	3
3	3	3	3	3	3
3	3	3	3	3	3
3	3	3	3	3	3
4	4	4	4	4	4
4	4	4	0	0	0
4	4	4	4	4	4
4	4	4	4	4	4
