# Supplementary figures and images for: Stem cell topography splits growth and homeostatic functions in the fish gill
Source: eLife journal article supplement (doi:10.7554/elife.43747), 2019-05-15

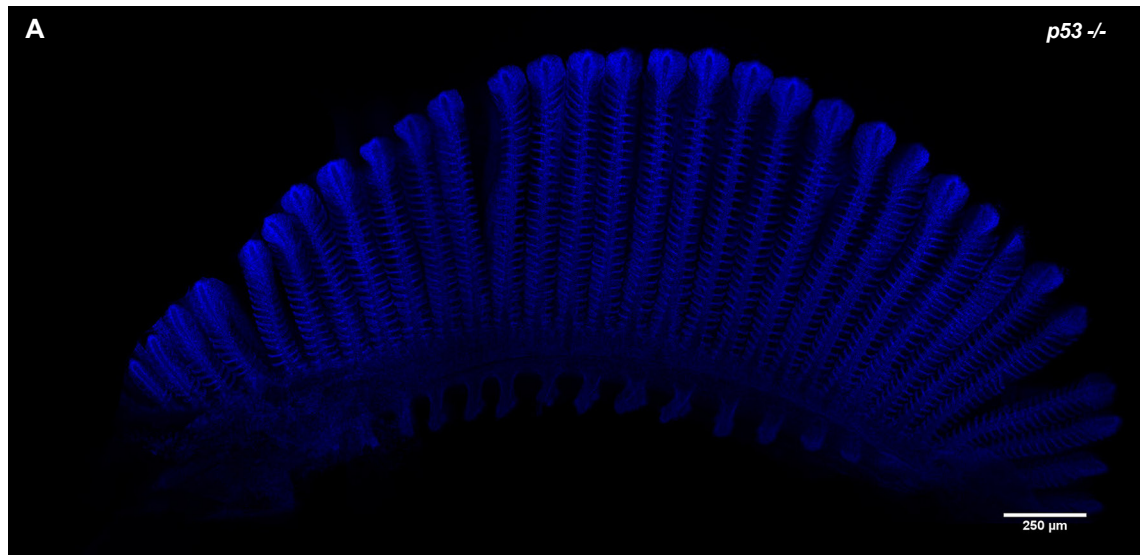

Stolper *et al*, Figure 6 - Figure Supplement 1

Supplement: supp [file elife-43747-supp-v1.zip]

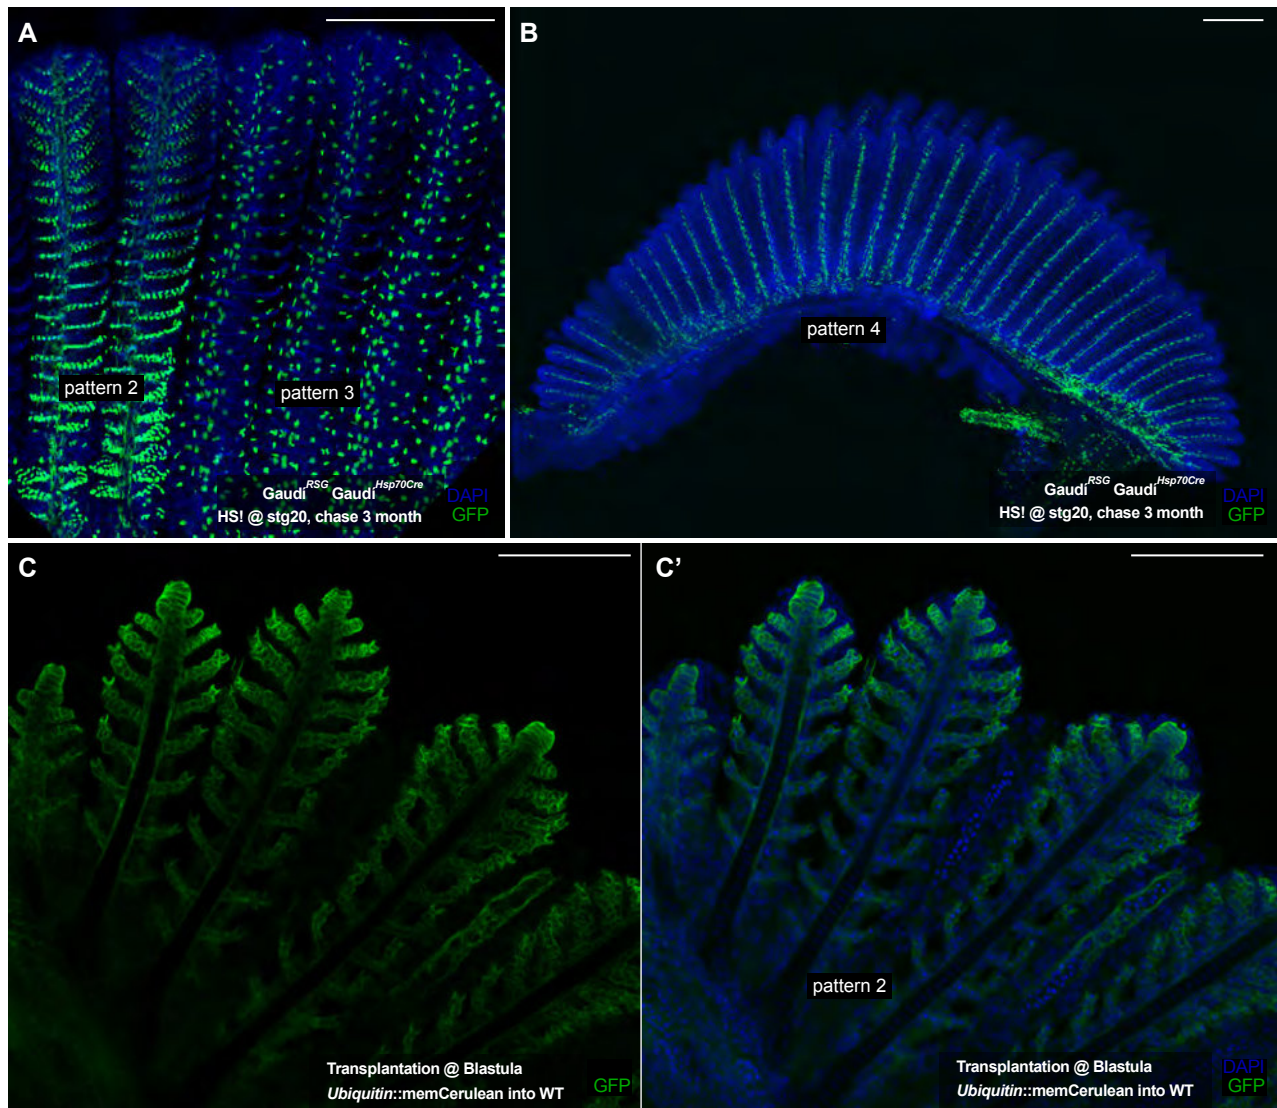

Supplement: supp [file elife-43747-supp-v1.zip]

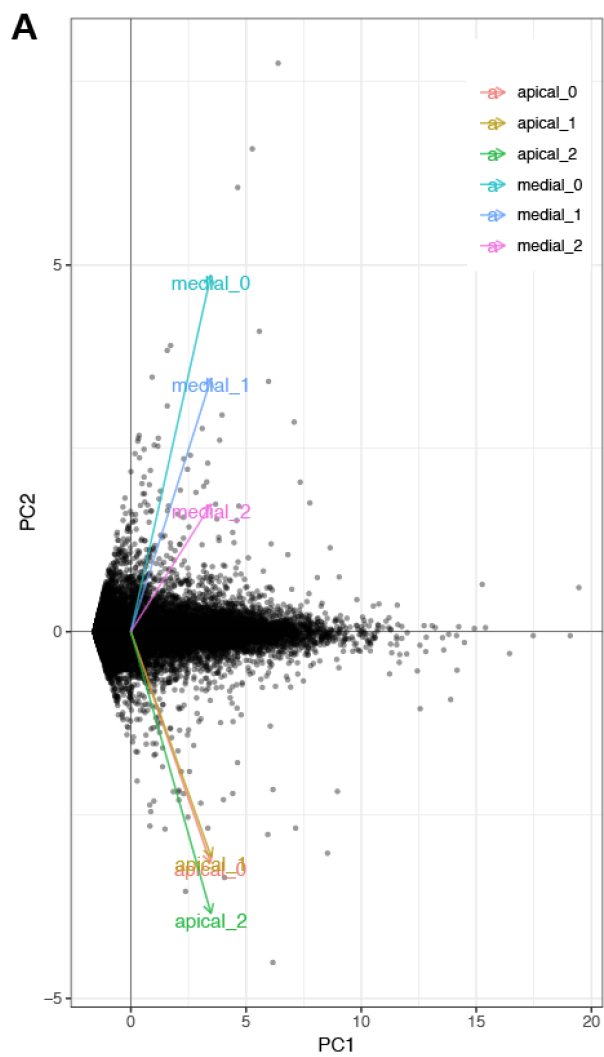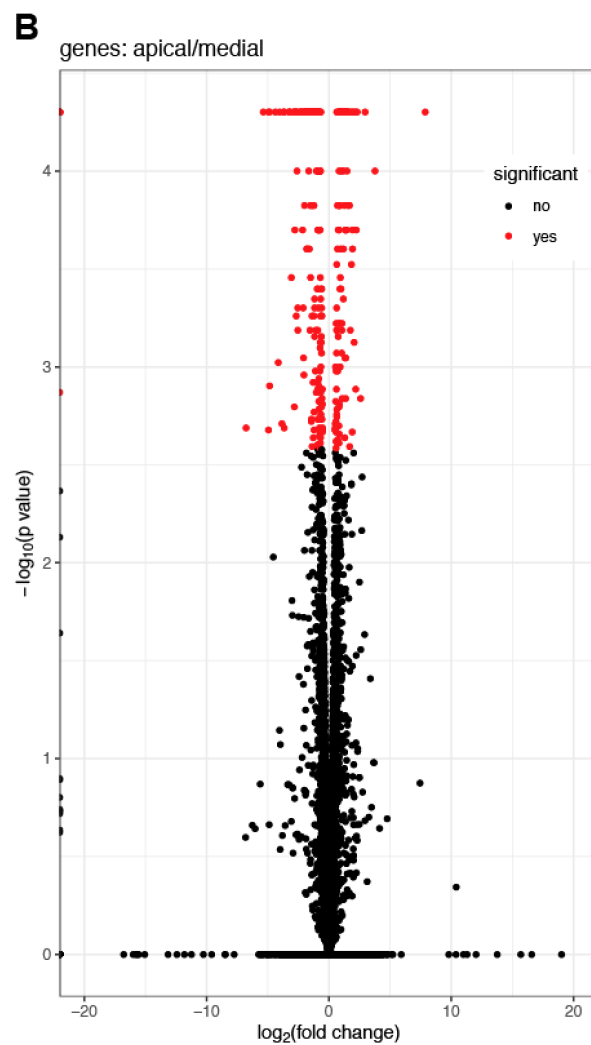

Supplement: supp [file elife-43747-supp-v1.zip]
